# Supplementary material for: Design, synthesis, docking study and anticancer evaluation of new trimethoxyphenyl pyridine derivatives as tubulin inhibitors and apoptosis inducers
Source: Royal Society of Chemistry journal article supplement (doi:10.1039/d1ra07922k), 2021-01-01

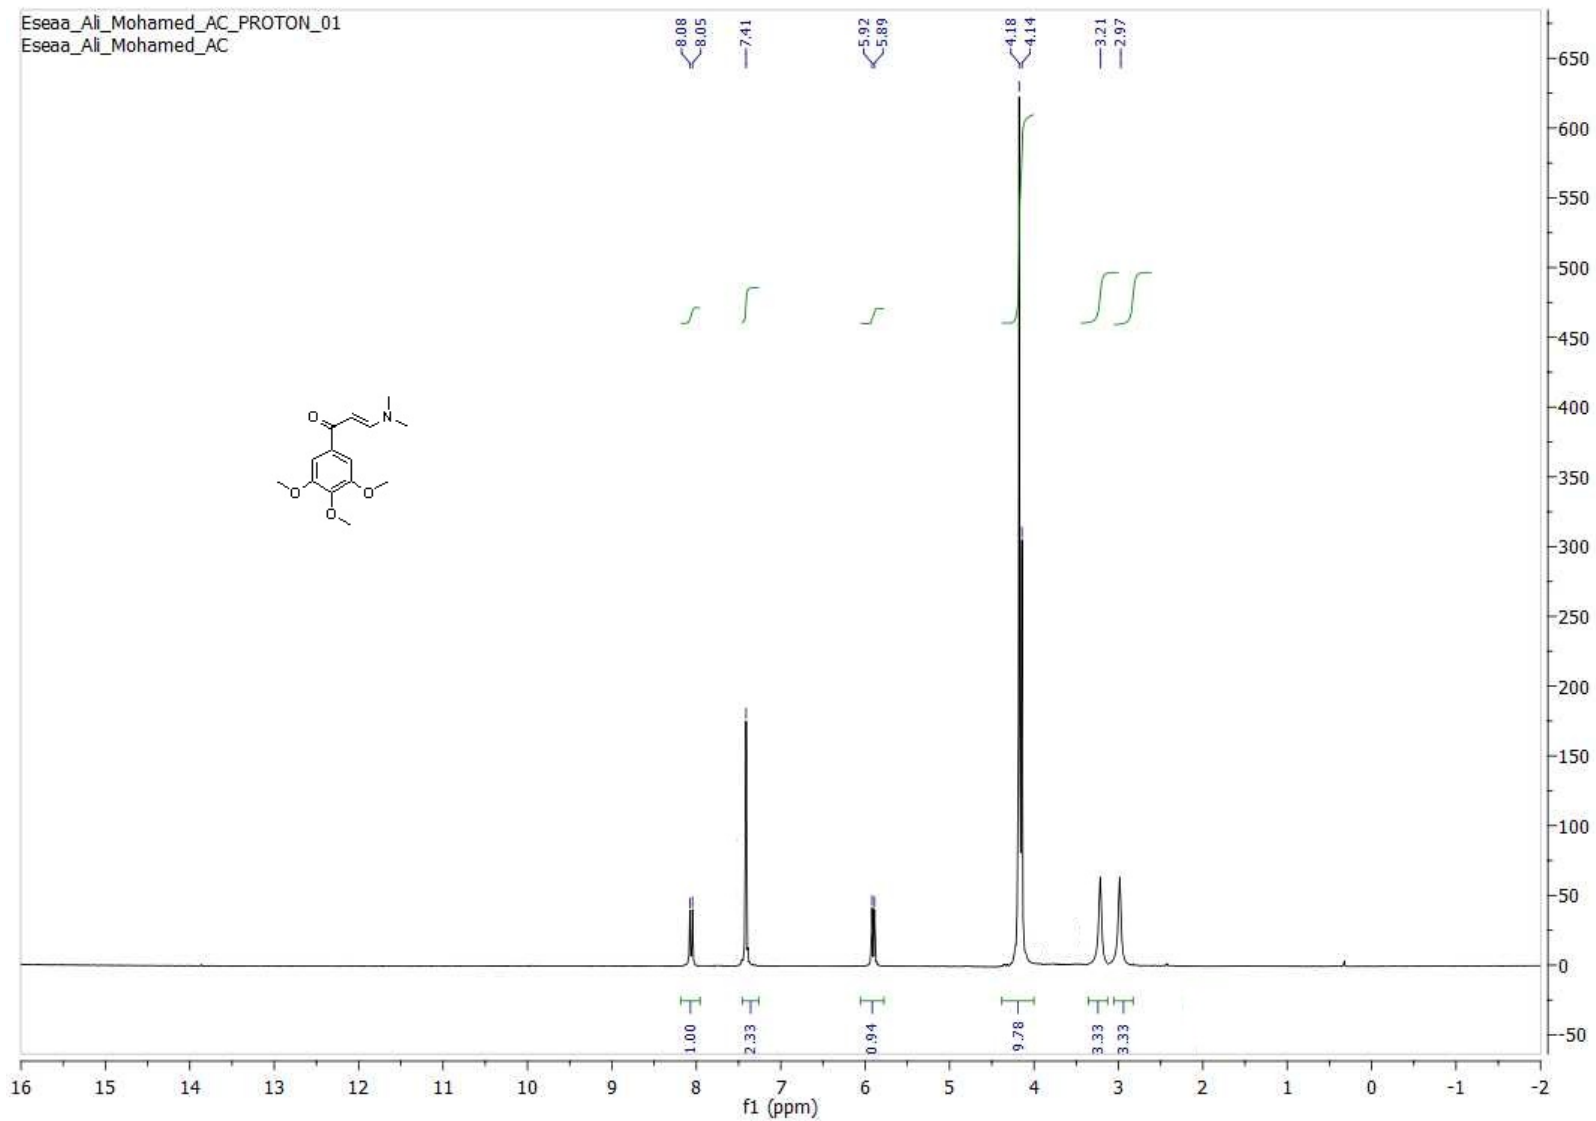

Eseaa\_Ali\_Mohamed\_AC4\_PROTON\_01  
Eseaa\_Ali\_Mohamed\_AC4

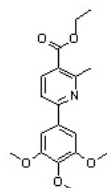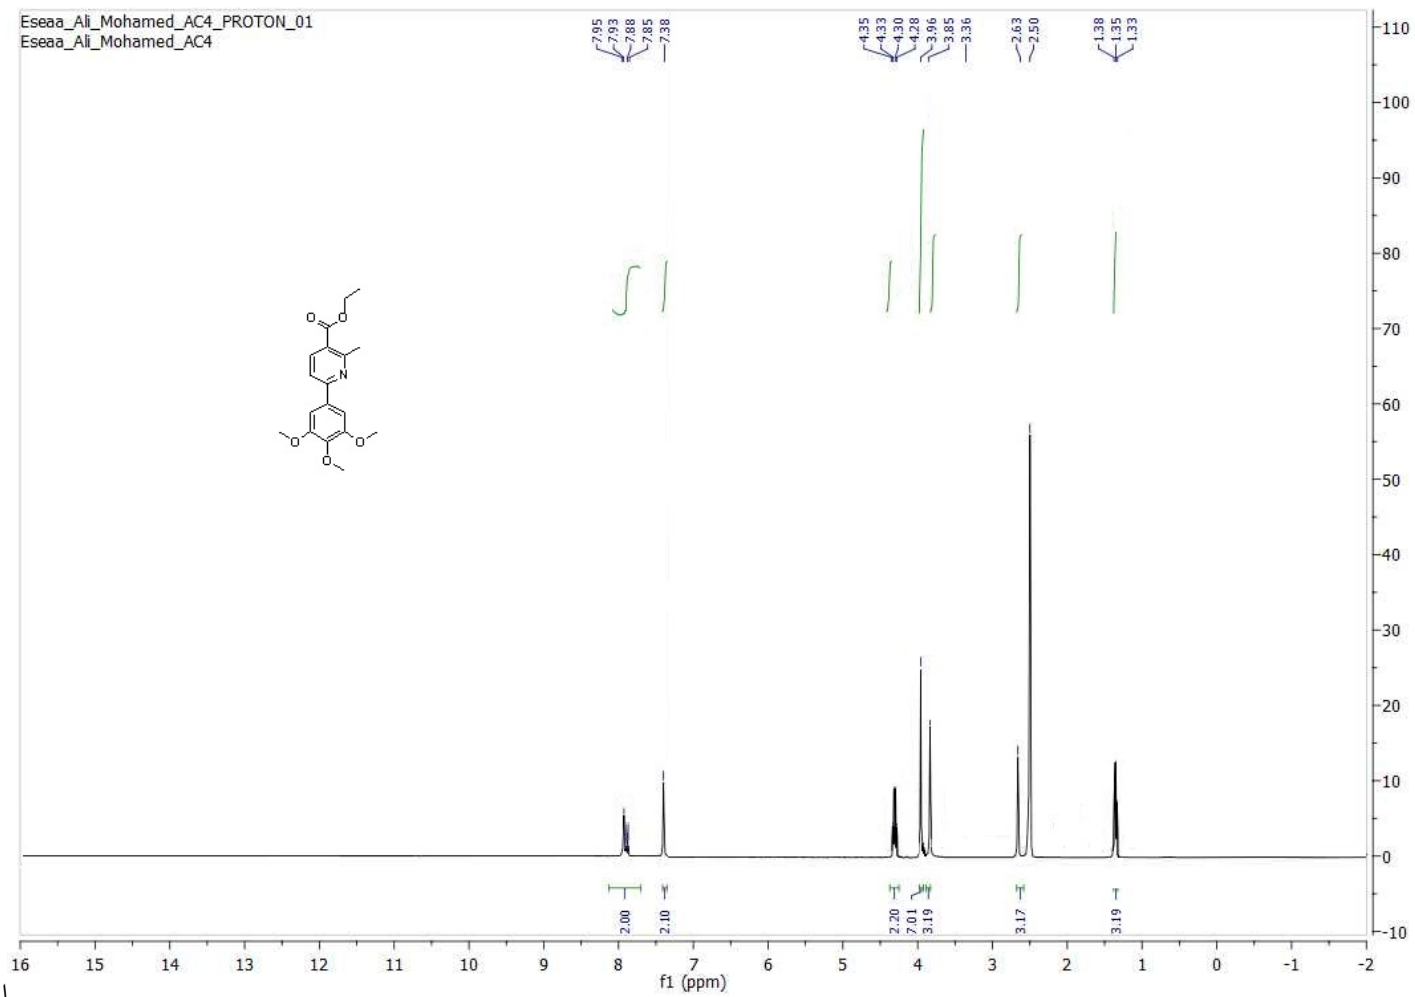

Dr\_Esraa\_Ali\_Mohamed\_AC5\_PROTON\_01  
Dr\_Esraa\_Ali\_Mohamed\_AC5

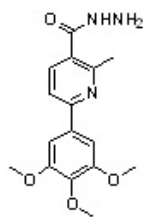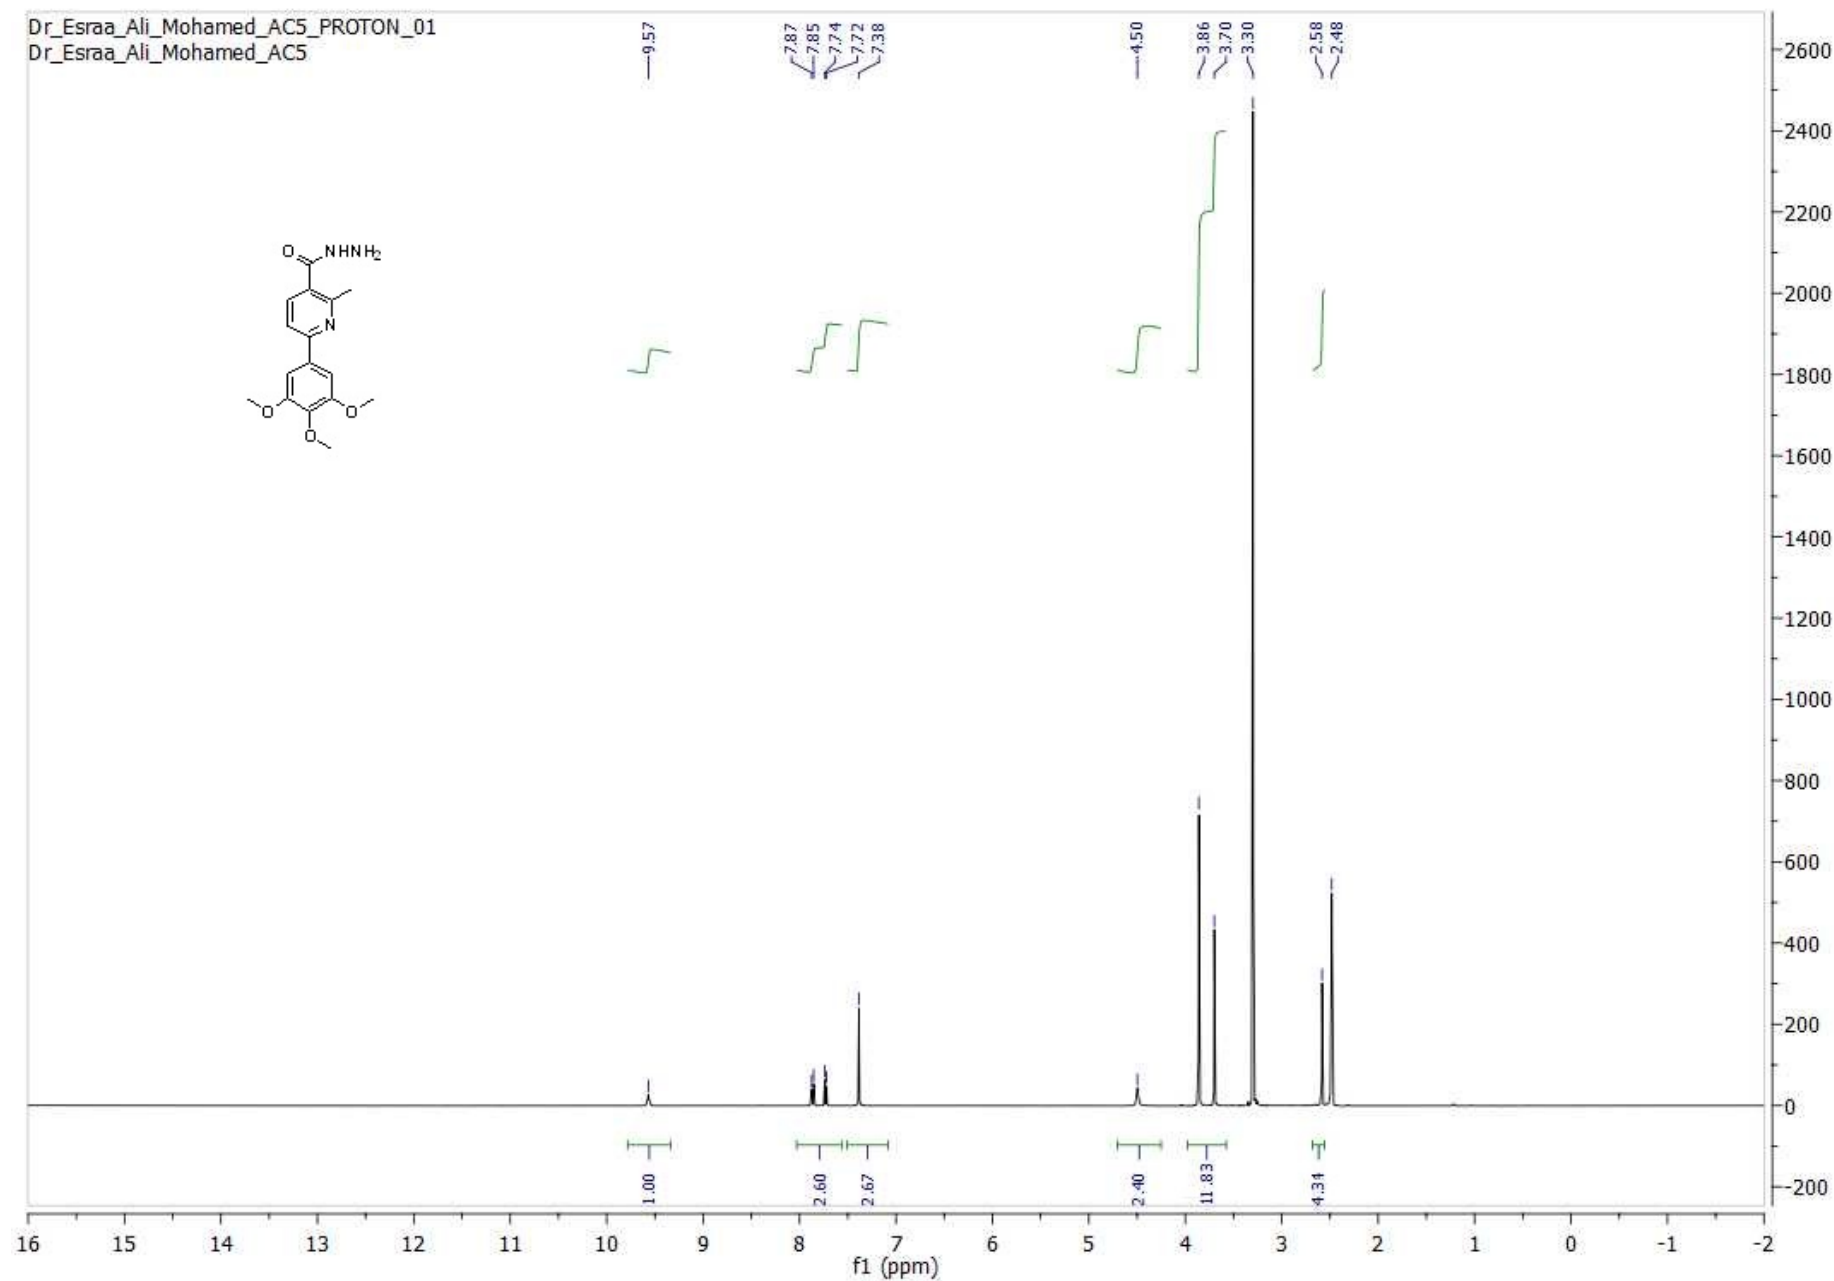

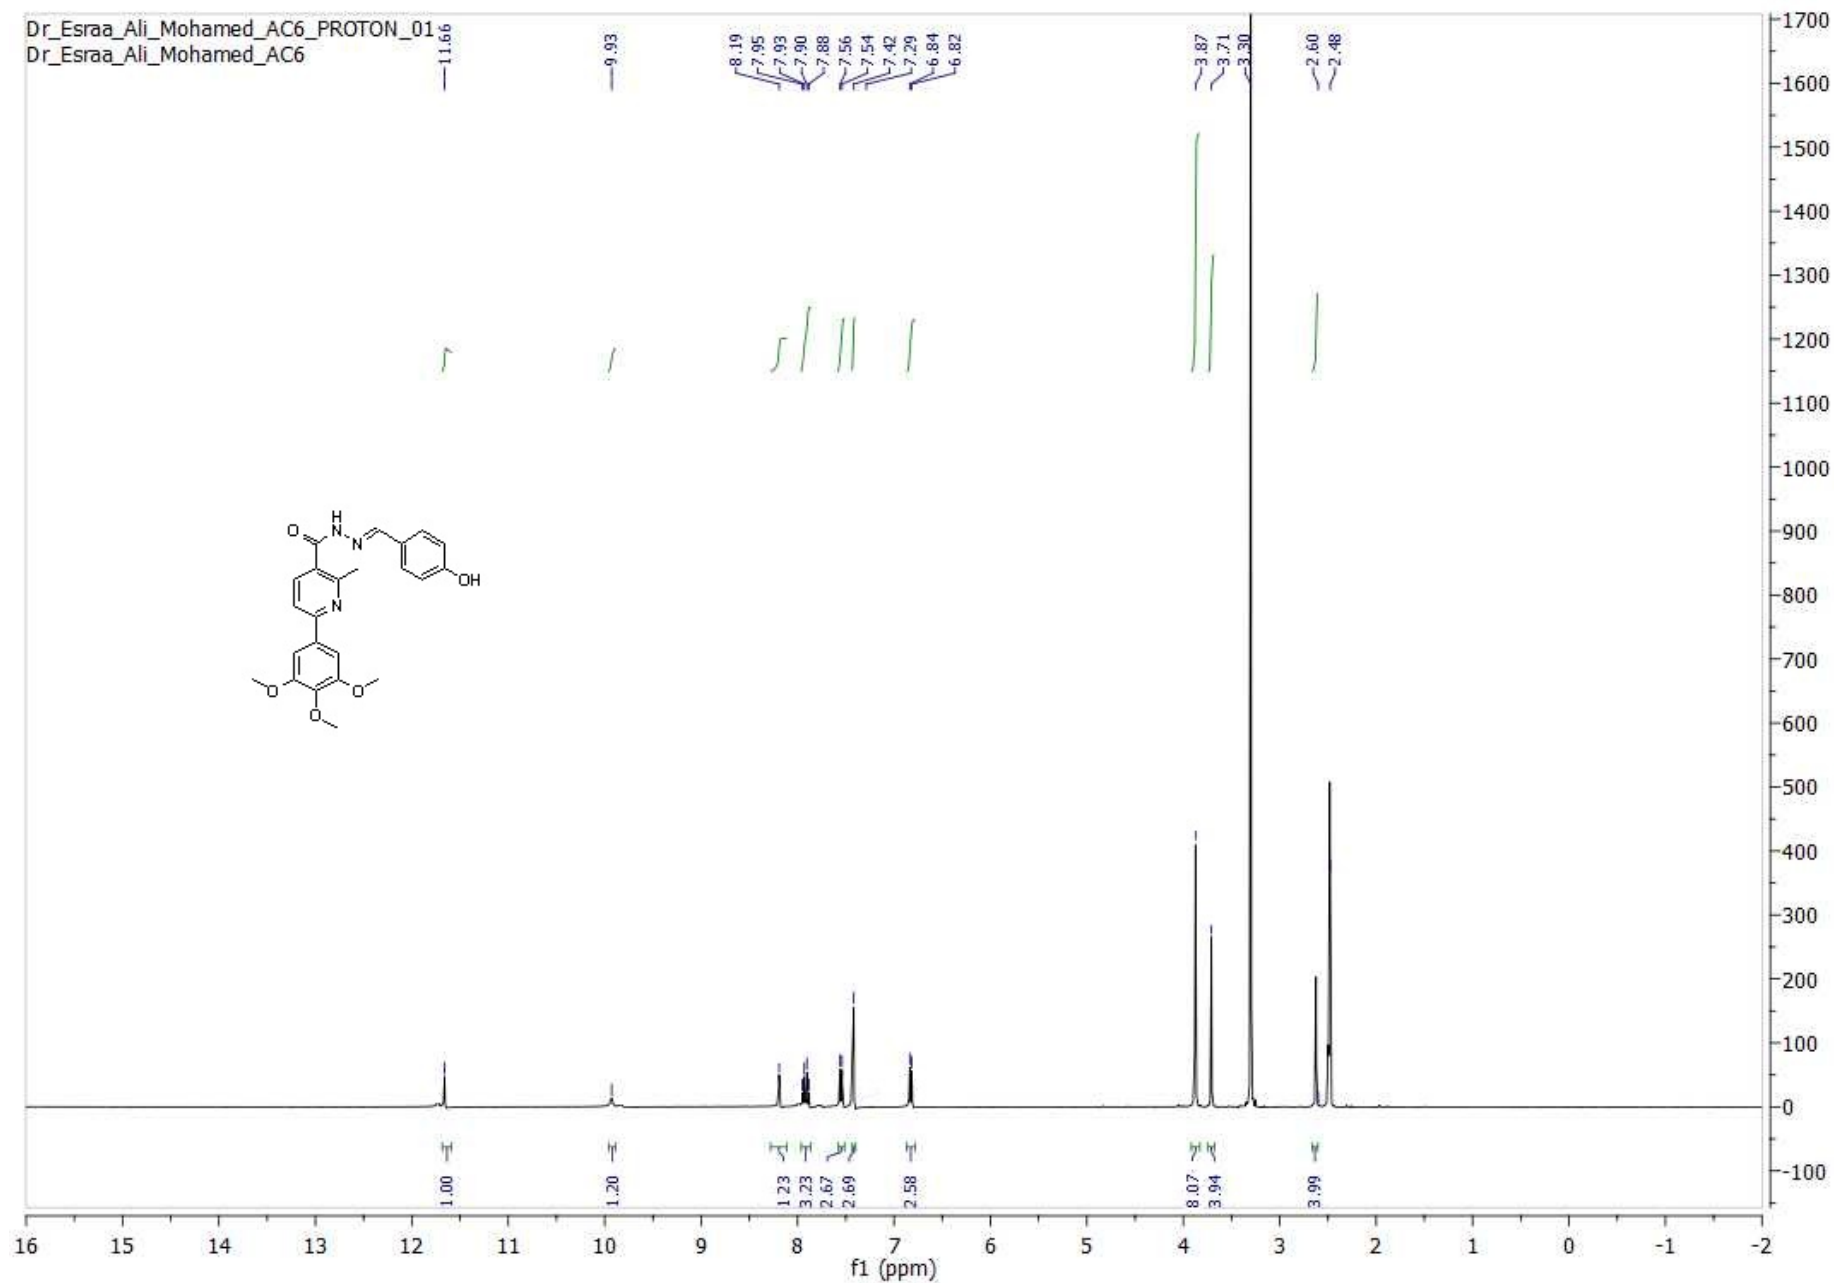

Dr\_Esraa\_Ali\_Mohamed\_AC6\_CARBON\_01  
Dr\_Esraa\_Ali\_Mohamed\_AC6

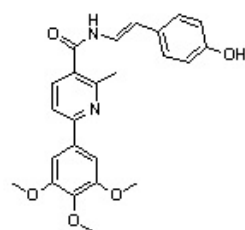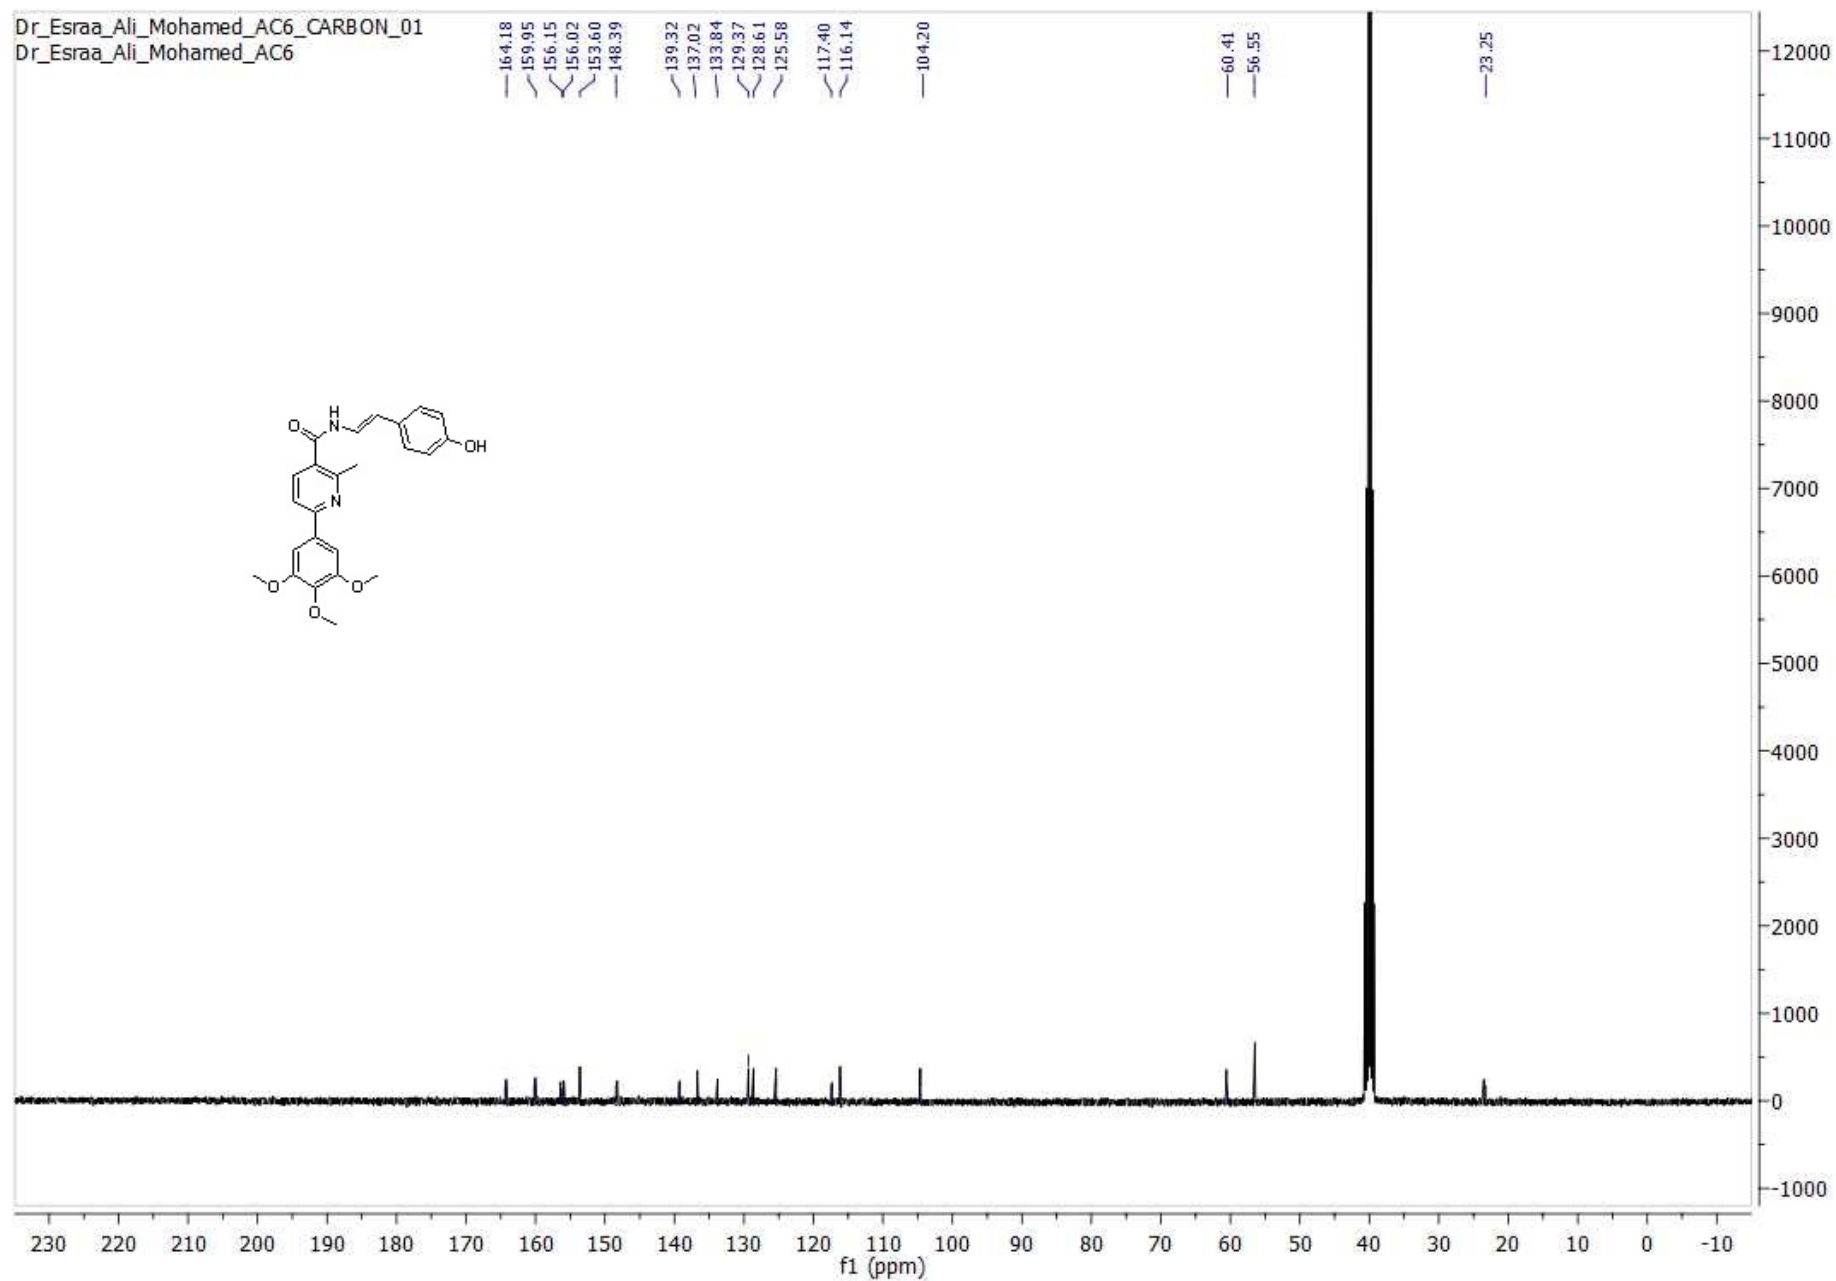

Dr\_Esraa\_Ali\_AC13\_PROTON\_01  
Dr\_Esraa\_Ali\_AC13

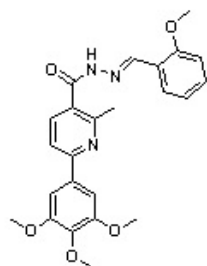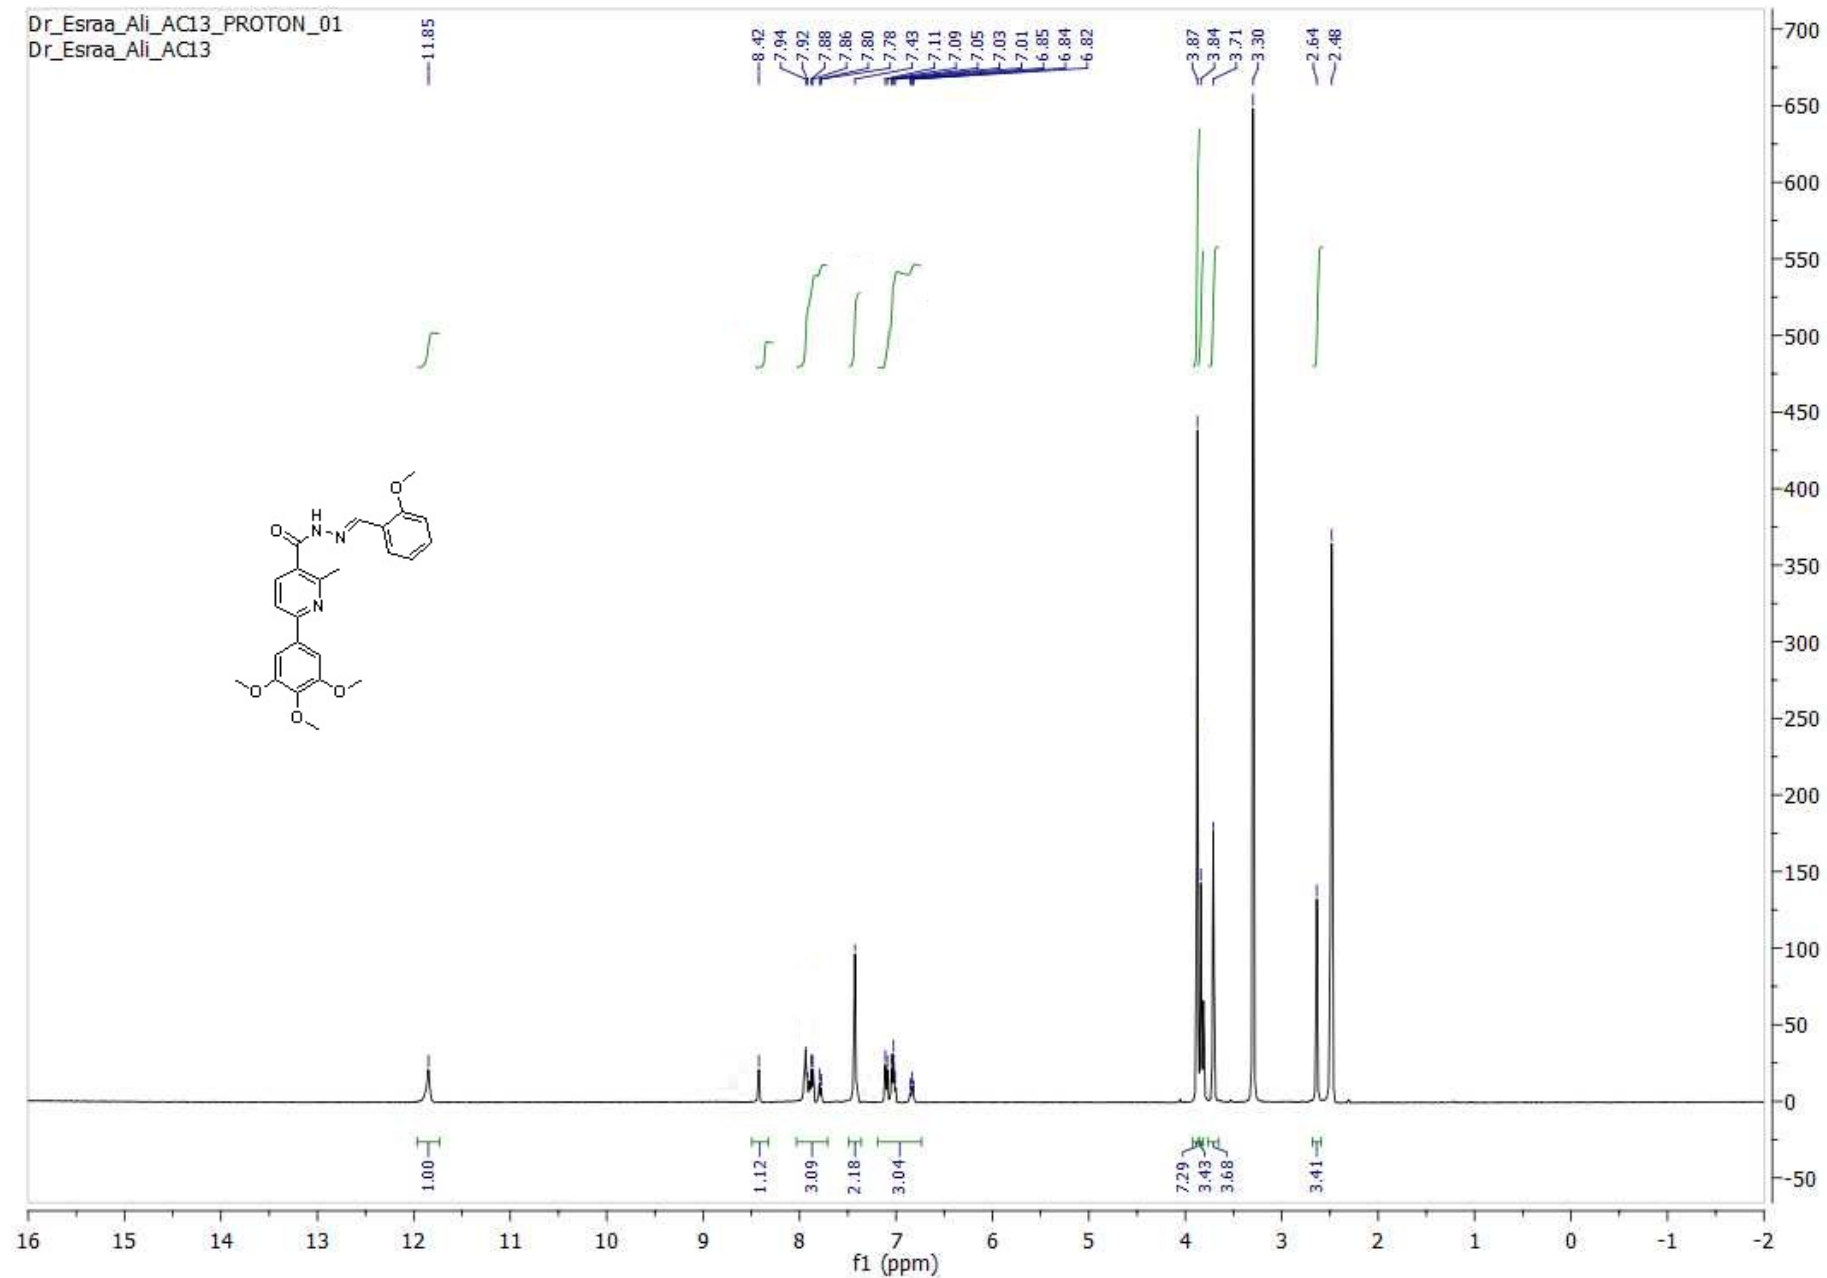

Dr\_Esraa\_Ali\_AC13\_CARBON\_01  
Dr\_Esraa\_Ali\_AC13

164.60  
159.40  
157.98  
155.93  
153.49  
148.92  
144.13  
139.24  
136.80  
133.33  
131.60  
126.01  
122.54  
120.82  
117.36  
112.15  
104.51

60.41  
56.96  
56.24

23.25

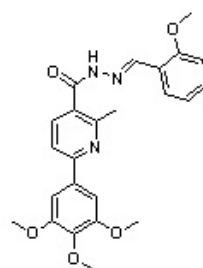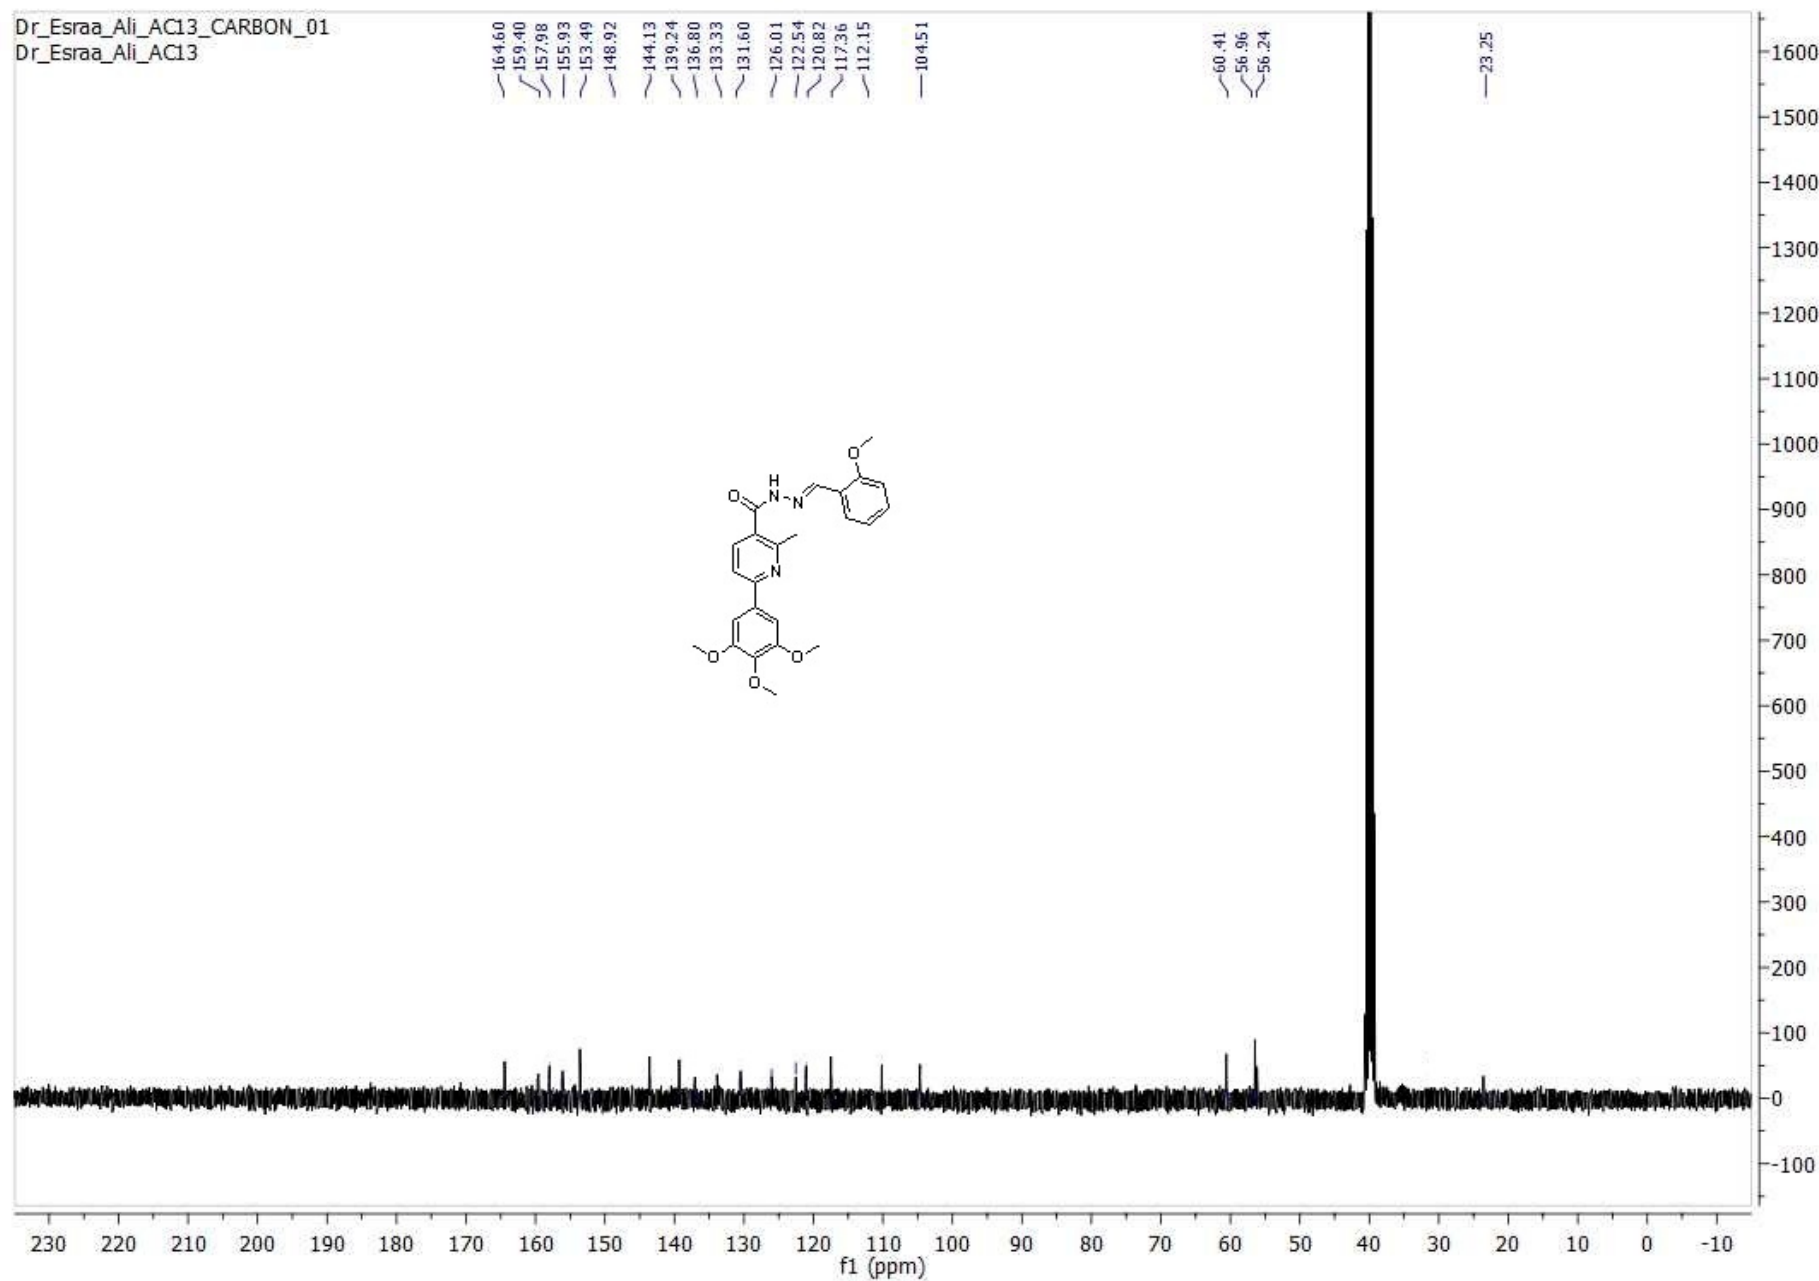

Dr\_Esraa\_Ali\_Mohamed\_AC8\_PROTON\_01  
Dr\_Esraa\_Ali\_Mohamed\_AC8

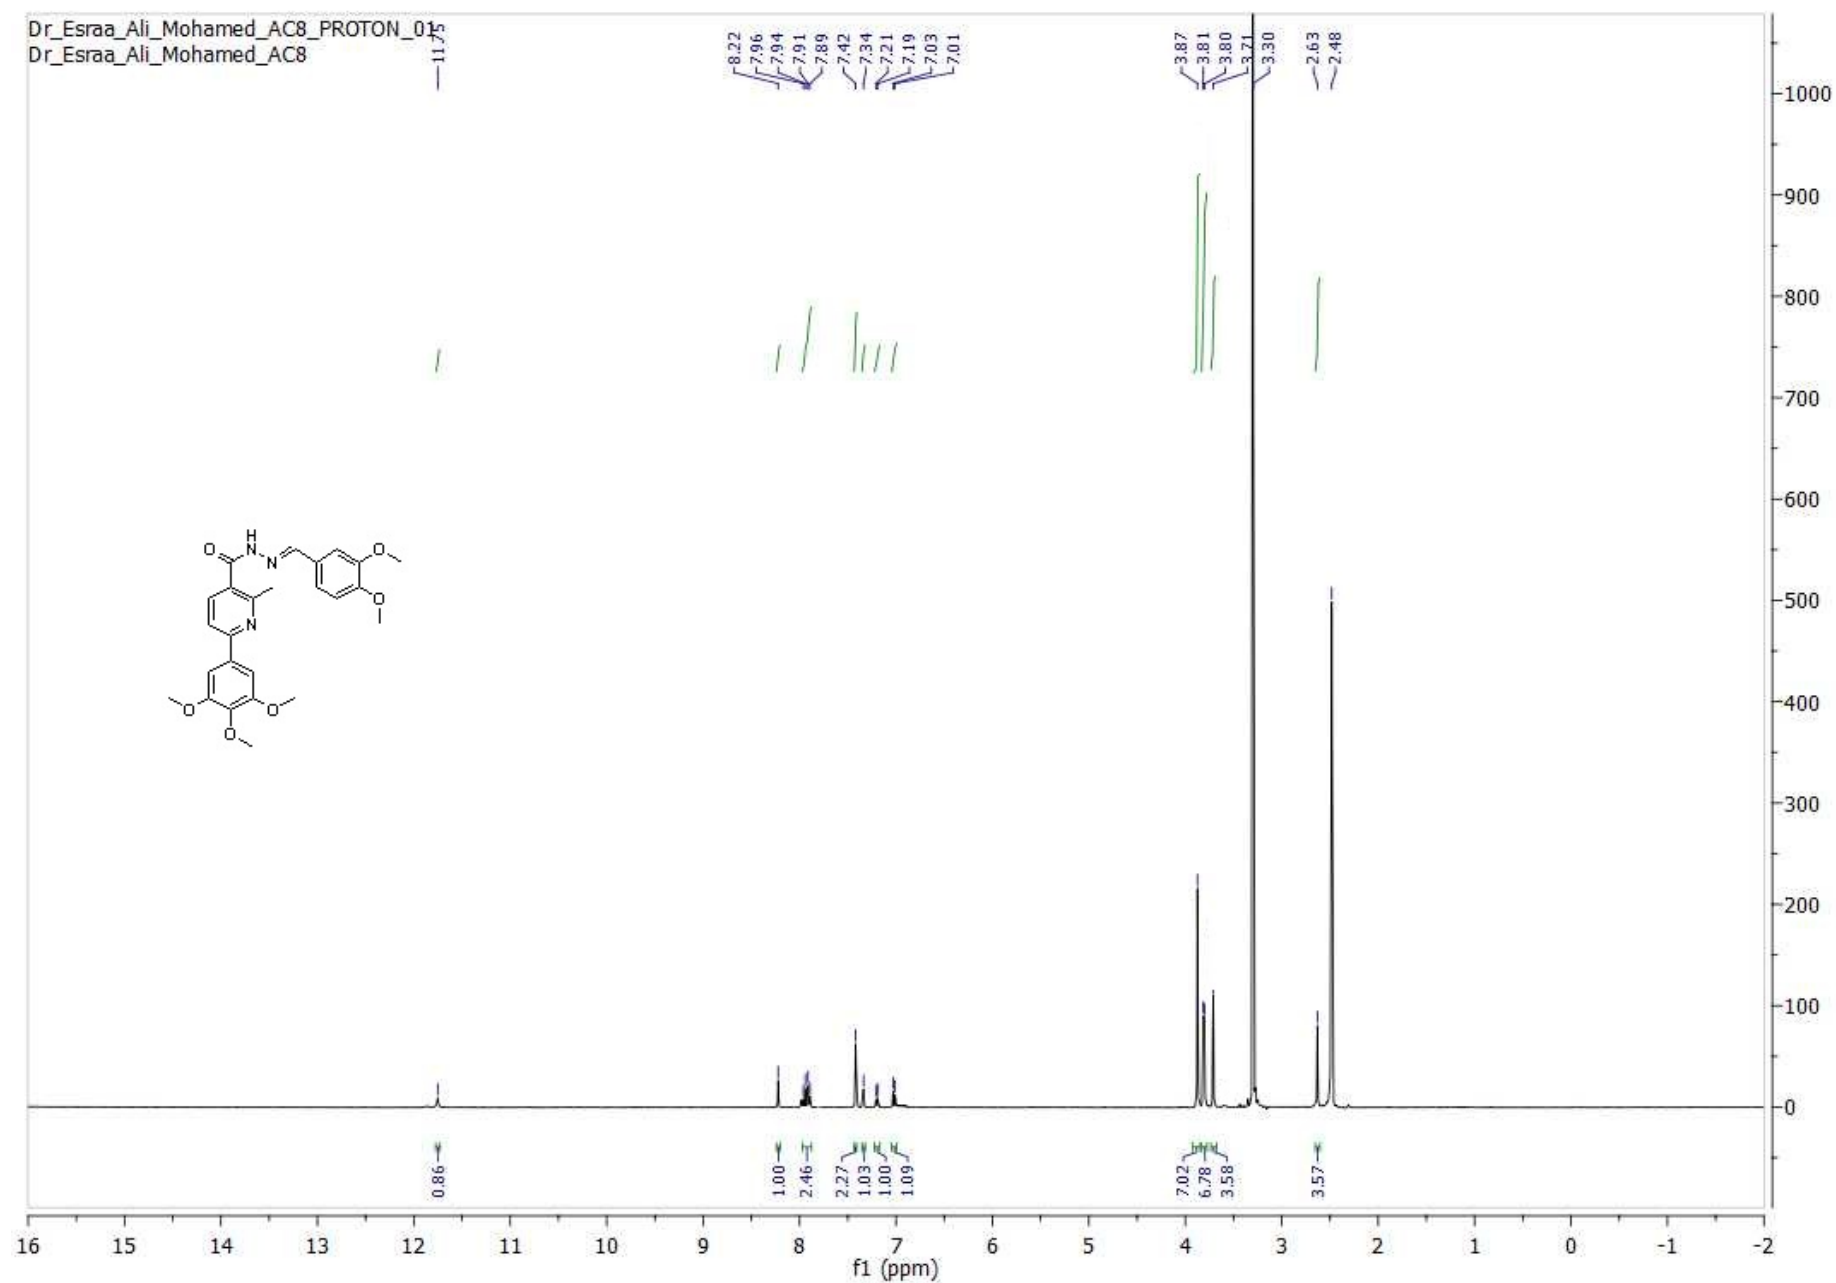



Dr\_Esraa\_Ali\_Mohamed\_AC8\_CARBON\_01  
Dr\_Esraa\_Ali\_Mohamed\_AC8

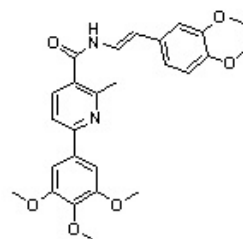

169.08  
164.60  
163.89

155.94  
153.10  
149.32  
148.61  
142.39  
137.12  
132.30  
129.17  
126.71  
122.54  
117.74  
111.44  
108.69  
104.51

60.53  
56.46  
56.03  
55.92

23.64

3600  
3400  
3200  
3000  
2800  
2600  
2400  
2200  
2000  
1800  
1600  
1400  
1200  
1000  
800  
600  
400  
200  
0  
-200

230 220 210 200 190 180 170 160 150 140 130 120 110 100 90 80 70 60 50 40 30 20 10 0 -10  
f1 (ppm)

Dr\_Esraa\_Ali\_Mohamed\_AC7\_PROTON\_01  
Dr\_Esraa\_Ali\_Mohamed\_AC7

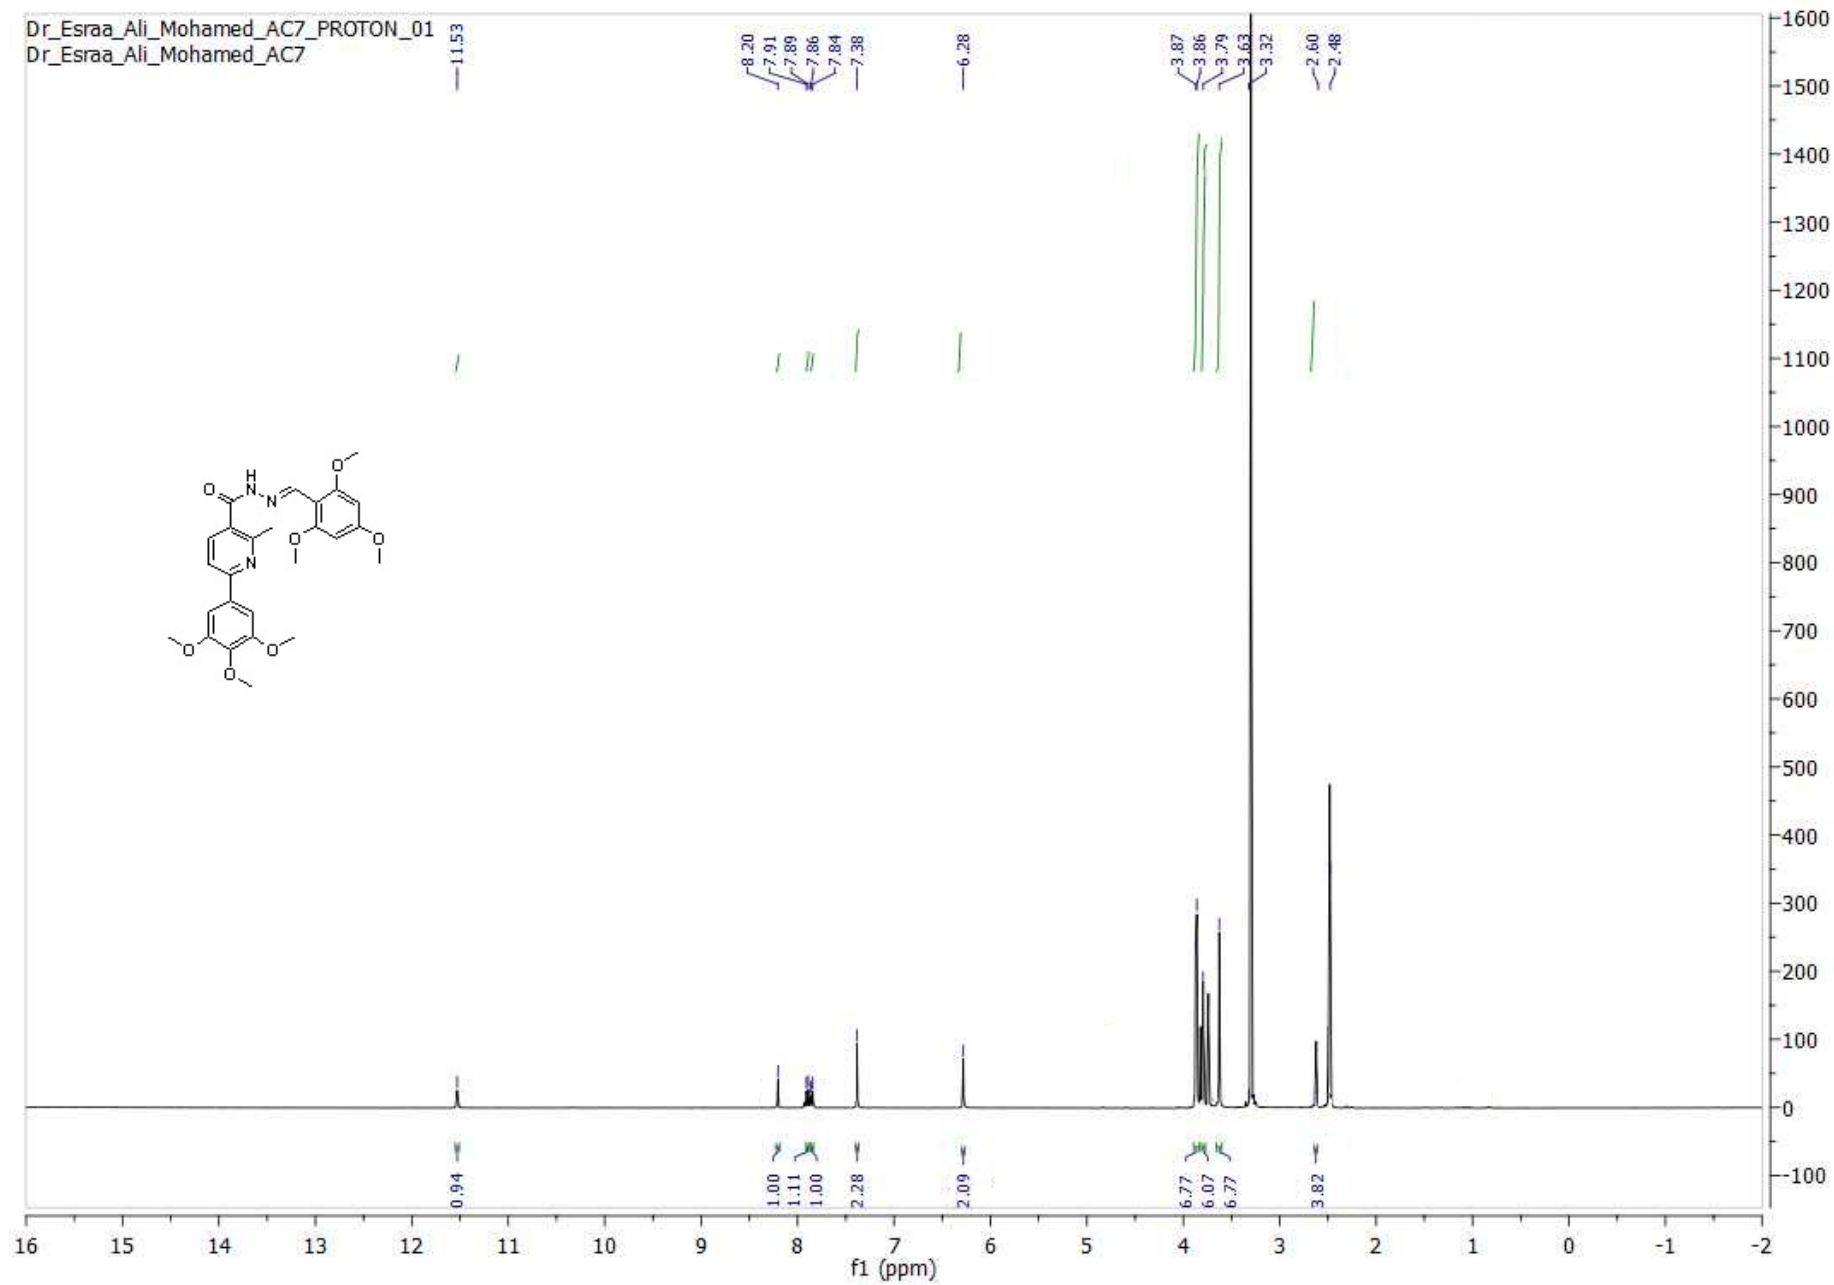

Dr\_Esraa\_Ali\_Mohamed\_AC7\_CARBON\_01  
Dr\_Esraa\_Ali\_Mohamed\_AC7

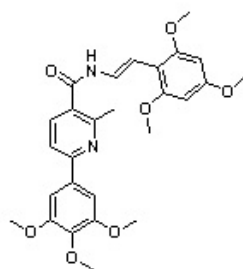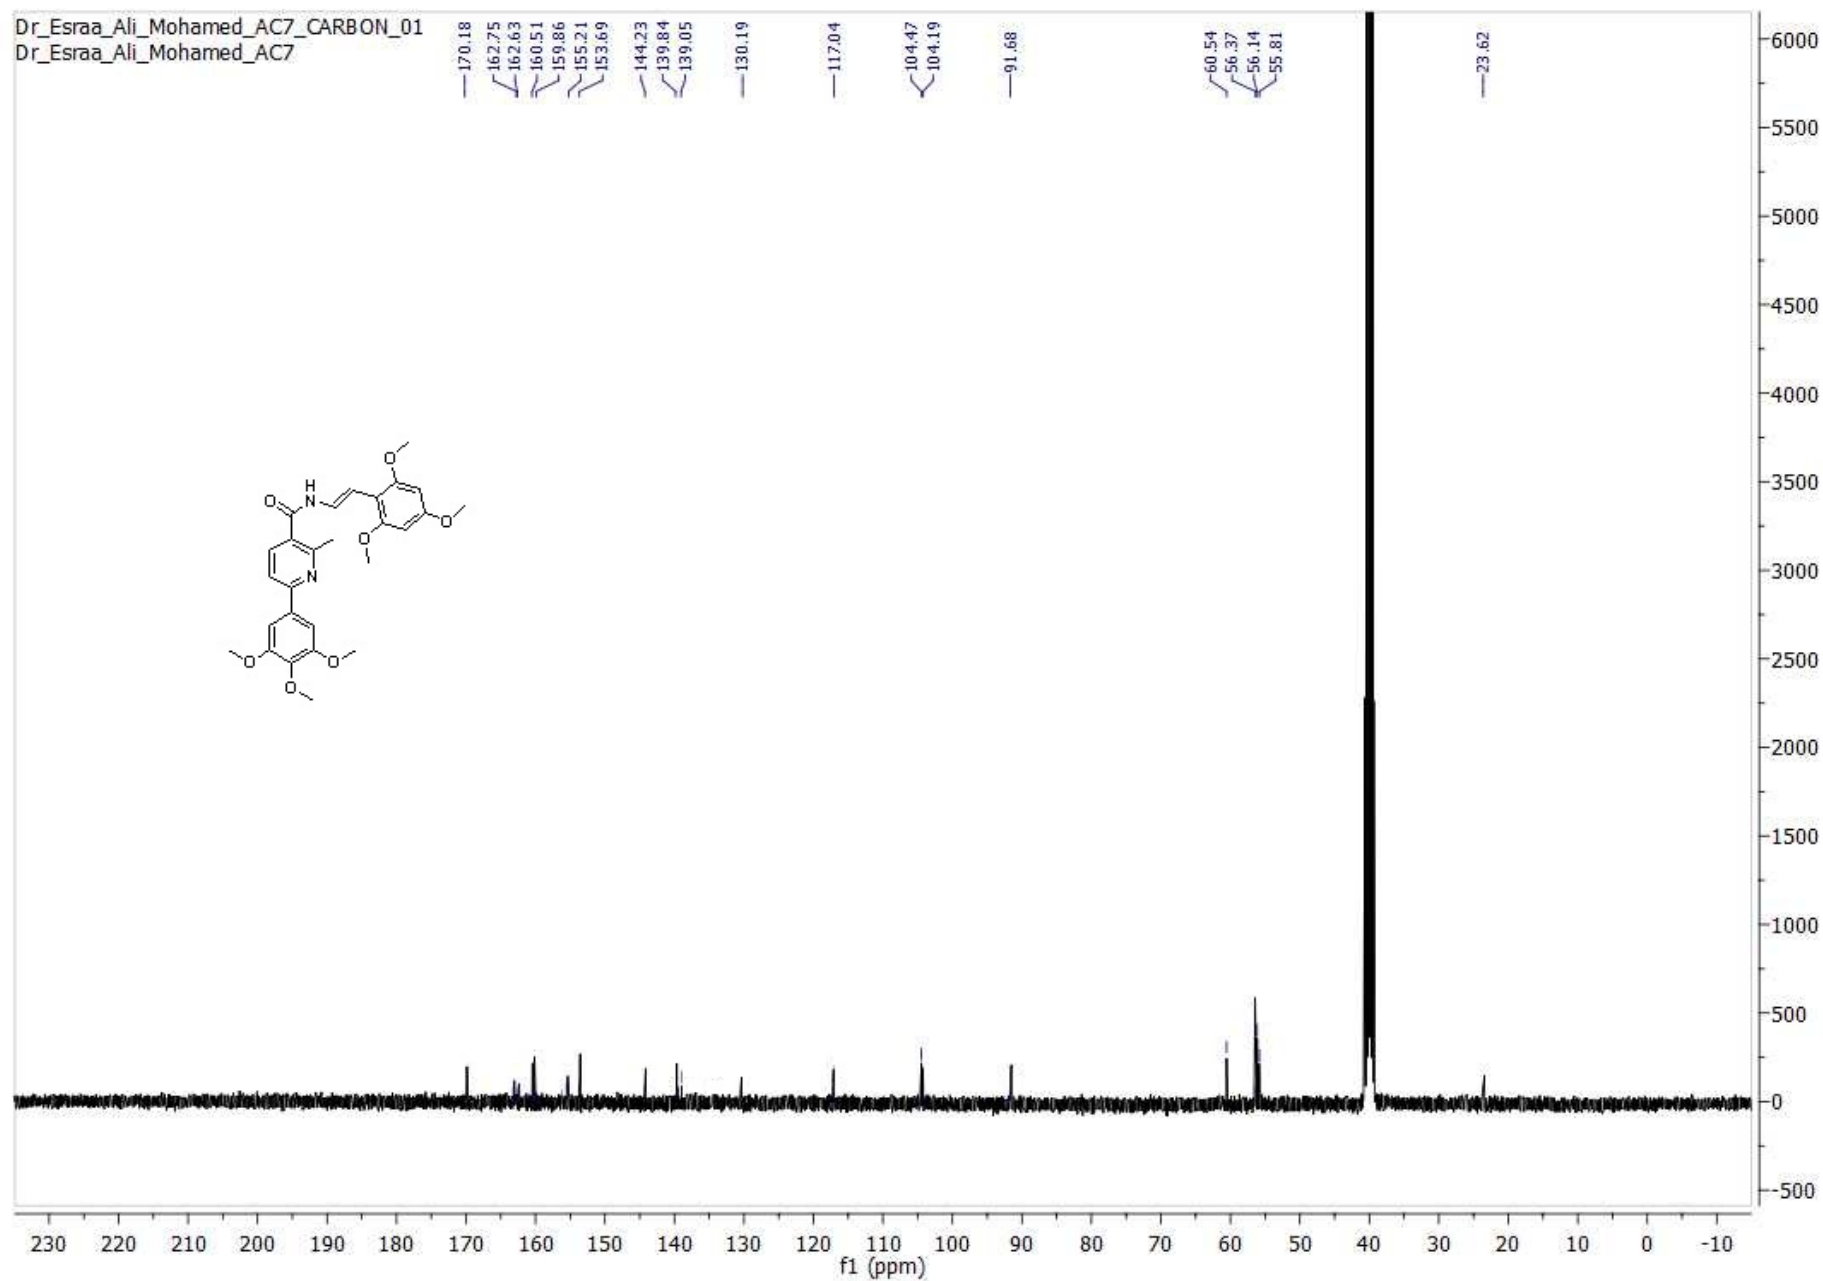

Dr\_Esraa\_Ali\_AC10\_PROTON\_01  
Dr\_Esraa\_Ali\_AC10

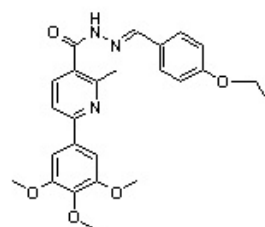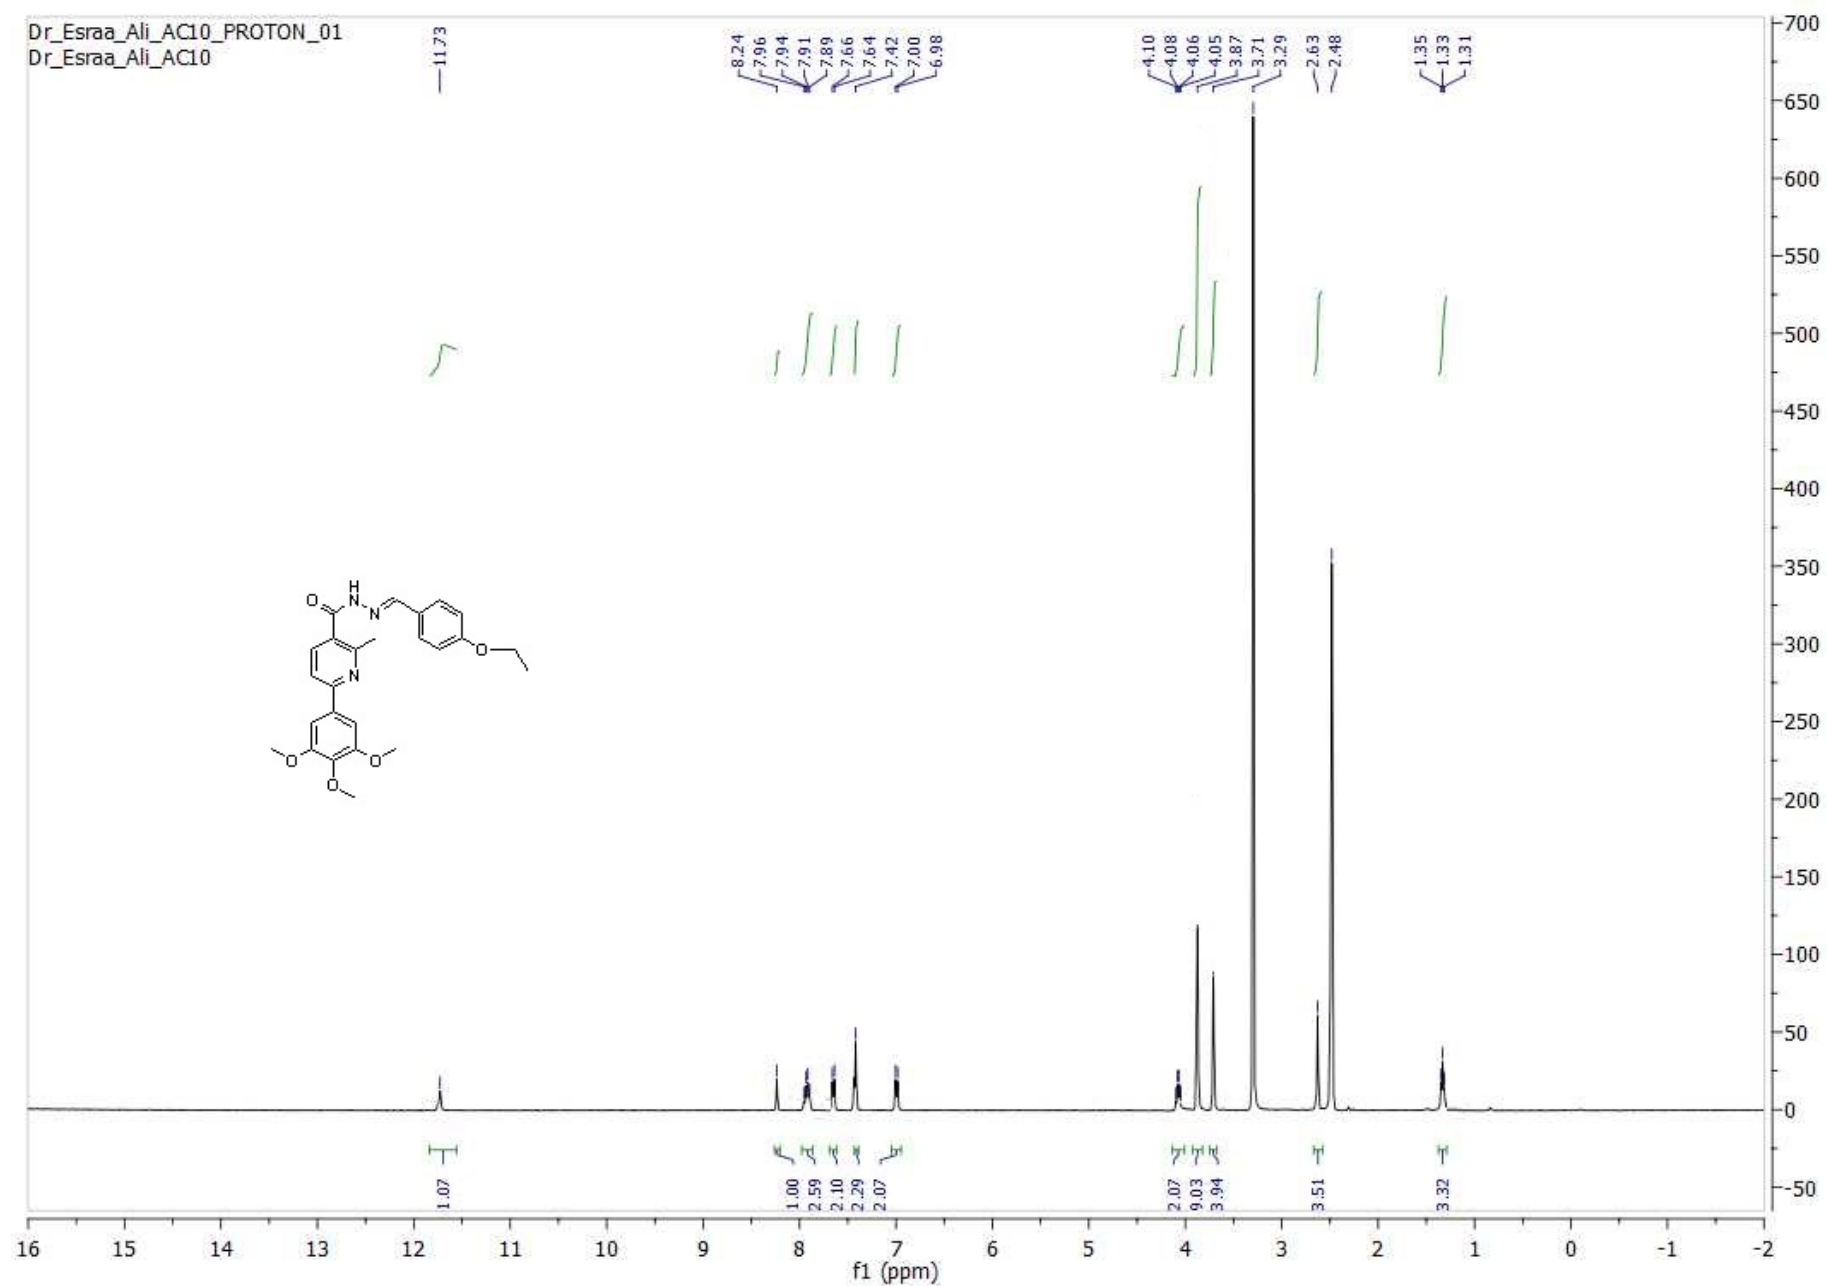

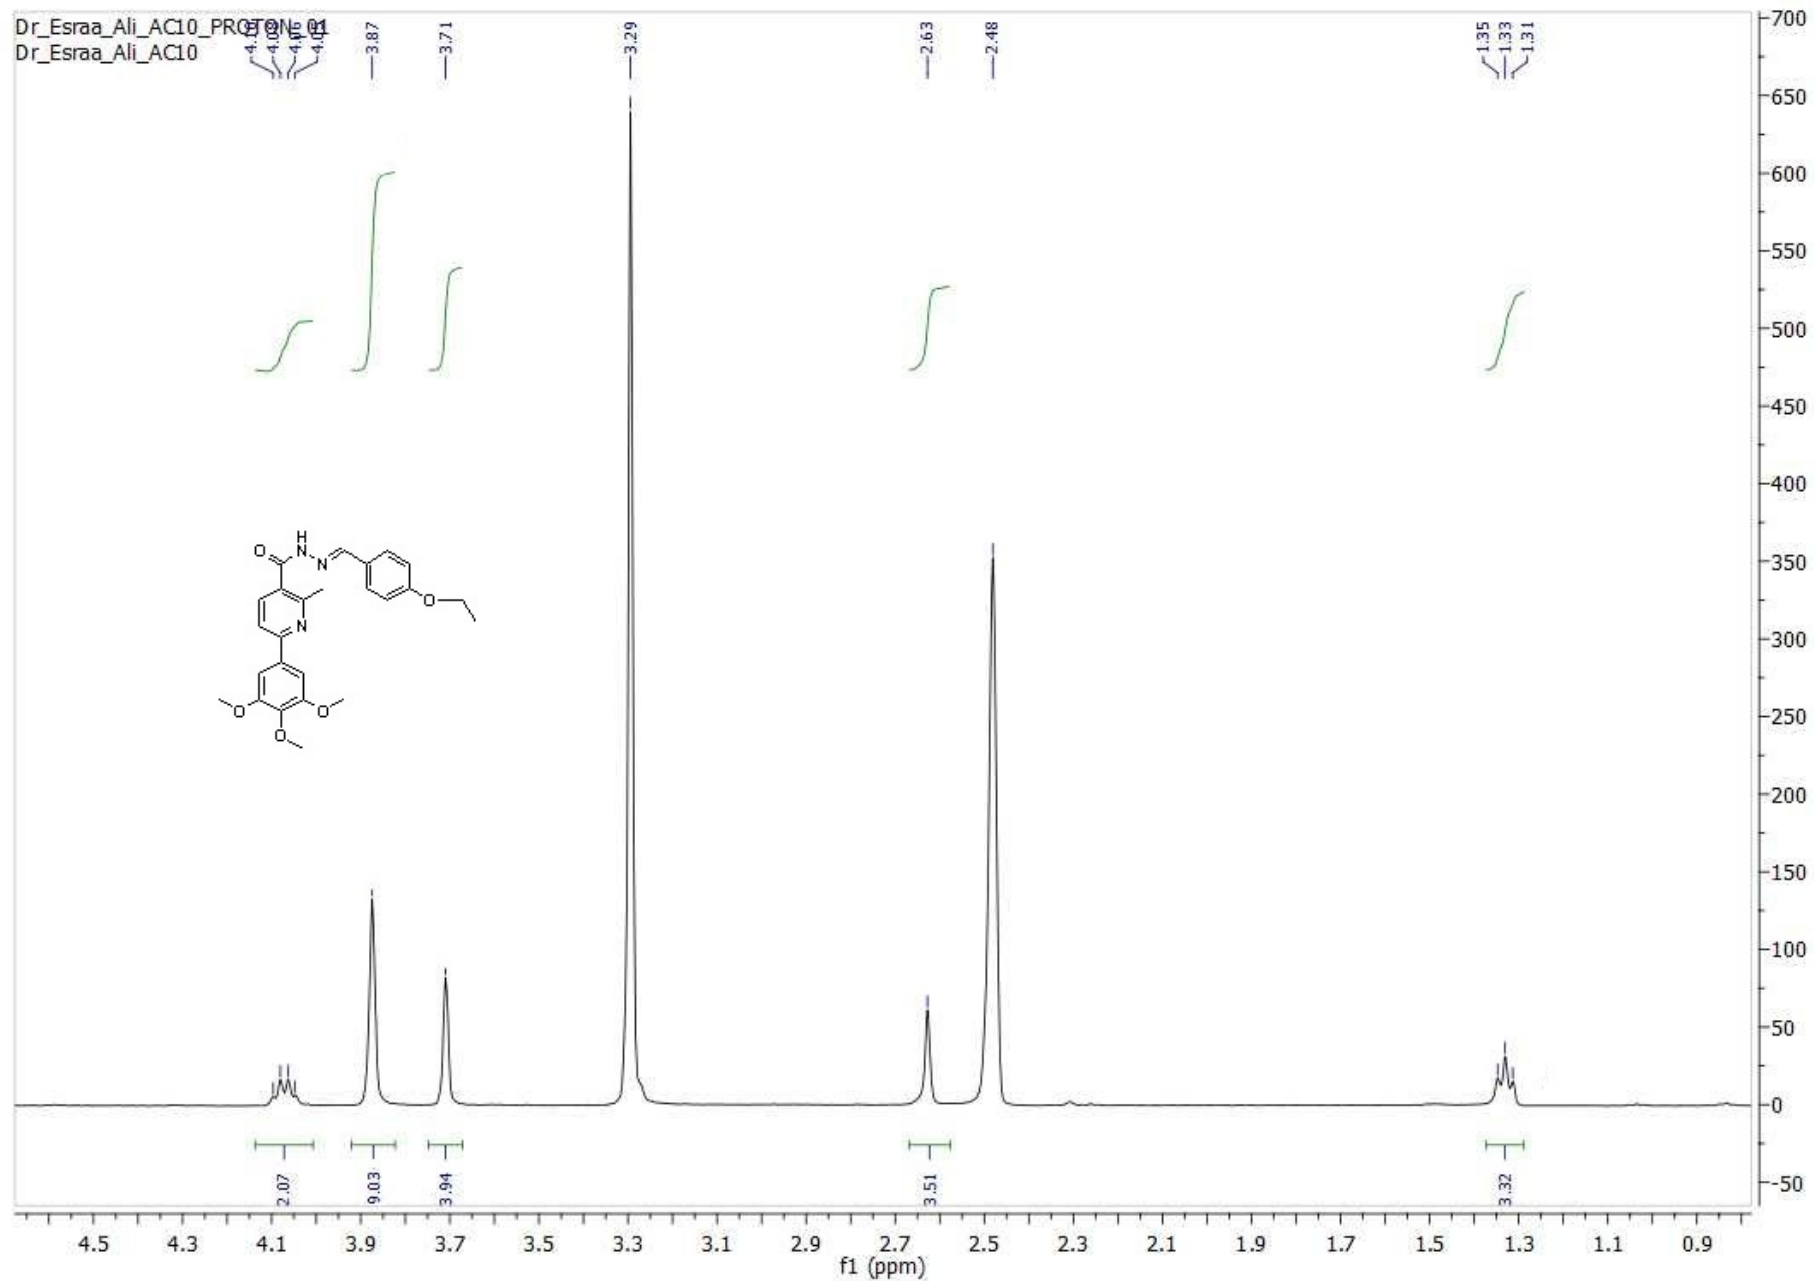

Dr\_Esraa\_Ali\_AC10\_PROTON\_01  
Dr\_Esraa\_Ali\_AC10

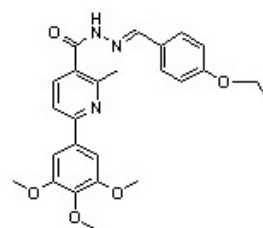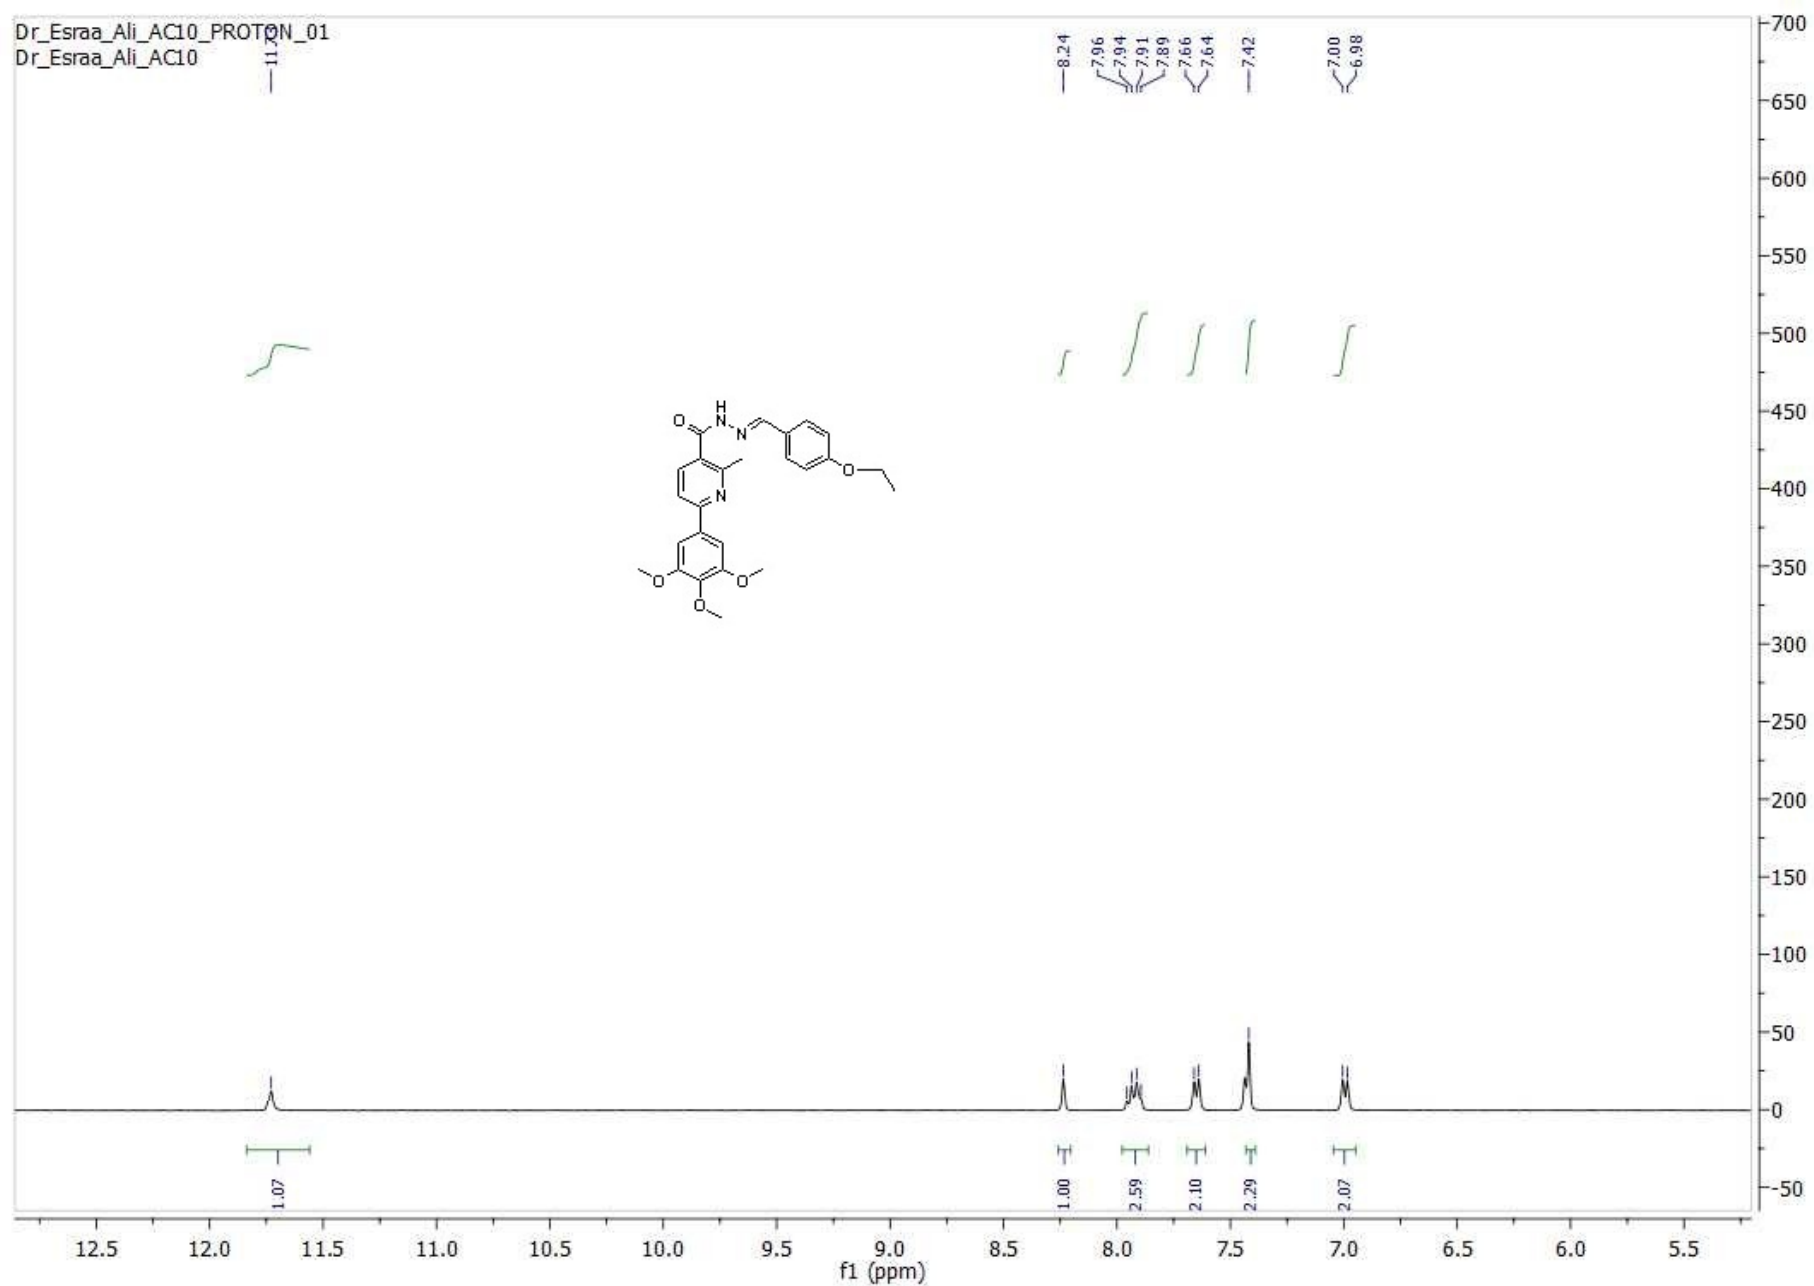

Dr\_Esraa\_Ali\_AC10\_CARBO\_01  
Dr\_Esraa\_Ali\_AC10

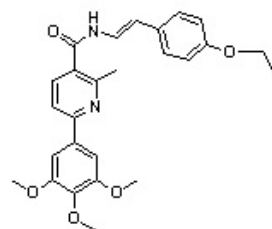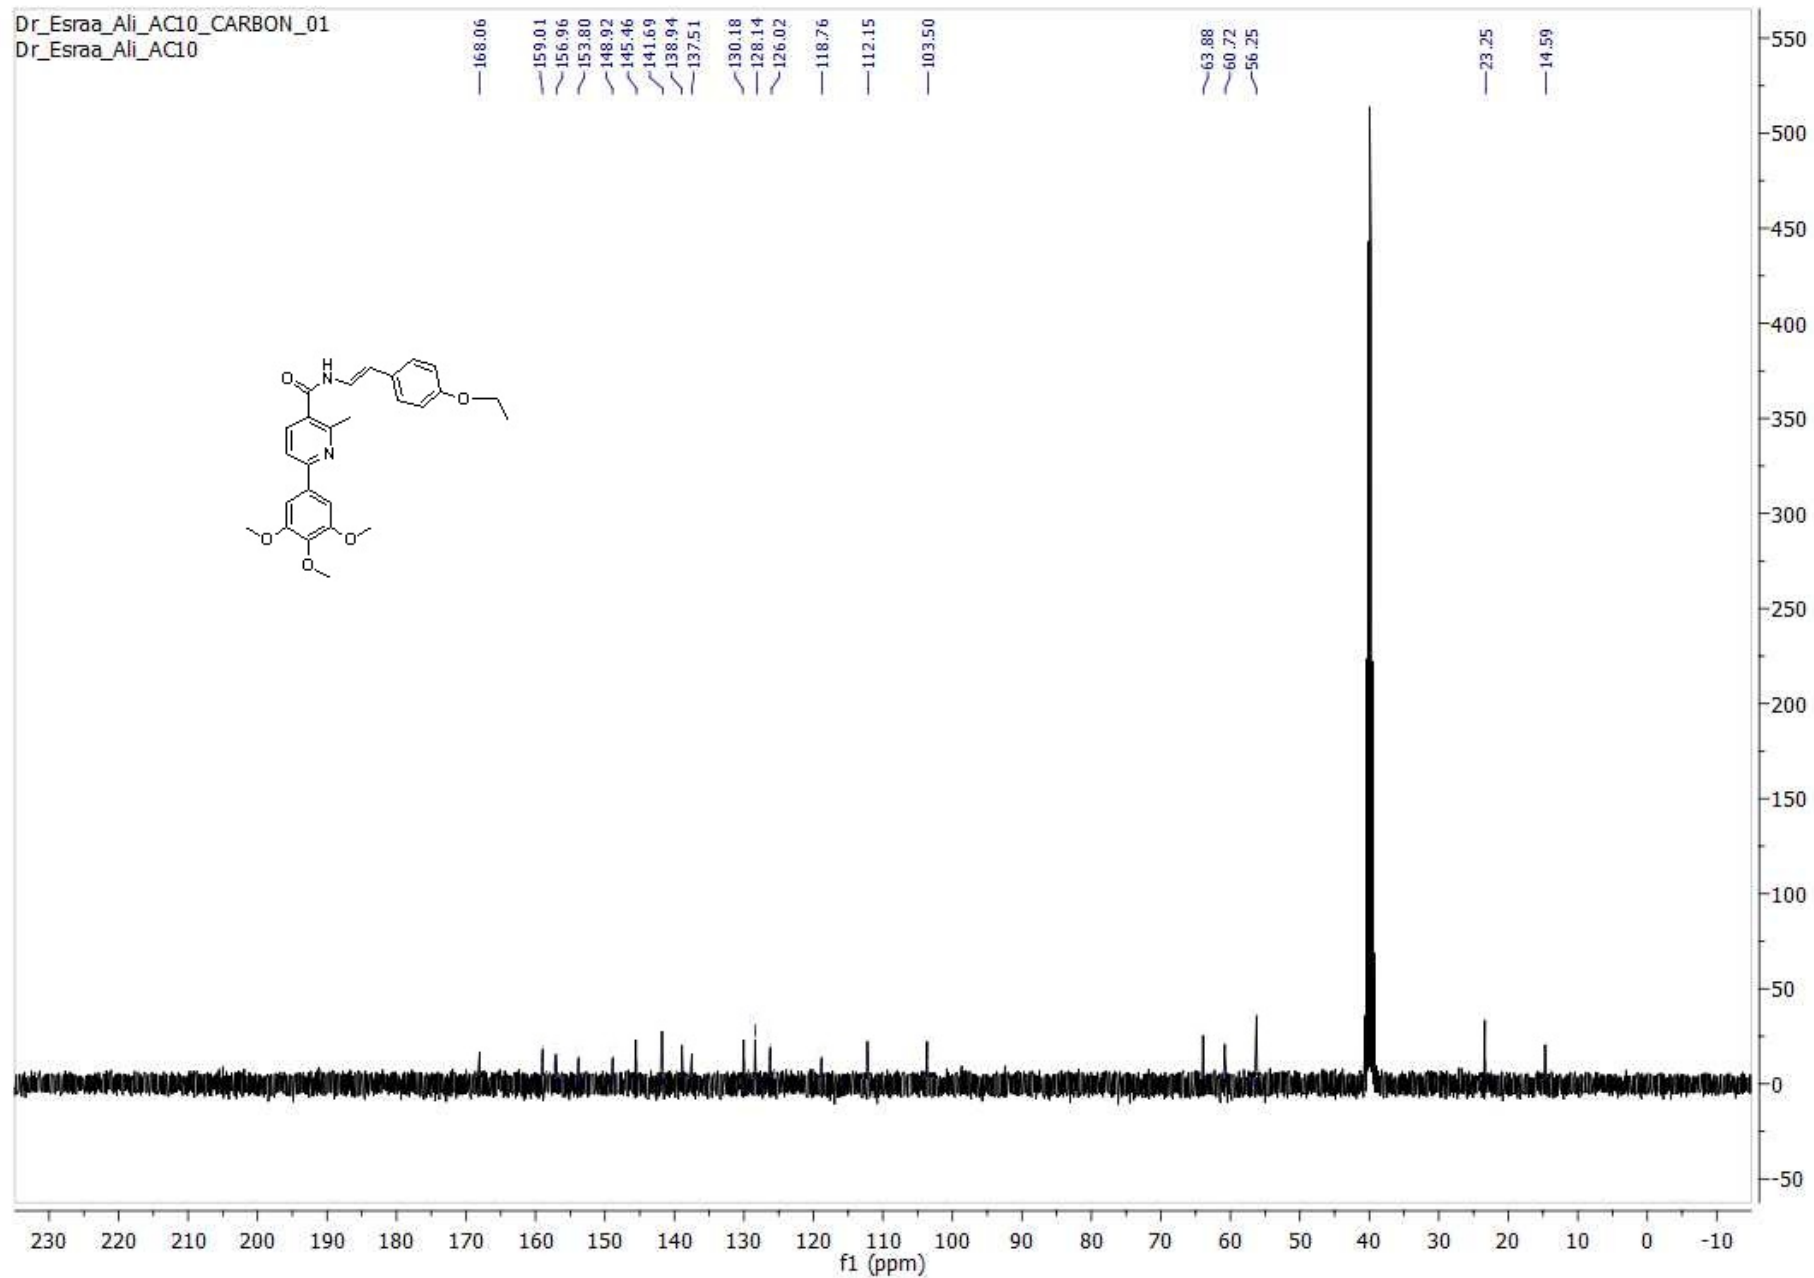

Dr\_Esraa\_Ali\_AC11\_PROTON\_01  
Dr\_Esraa\_Ali\_AC11

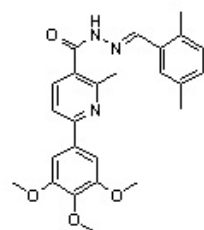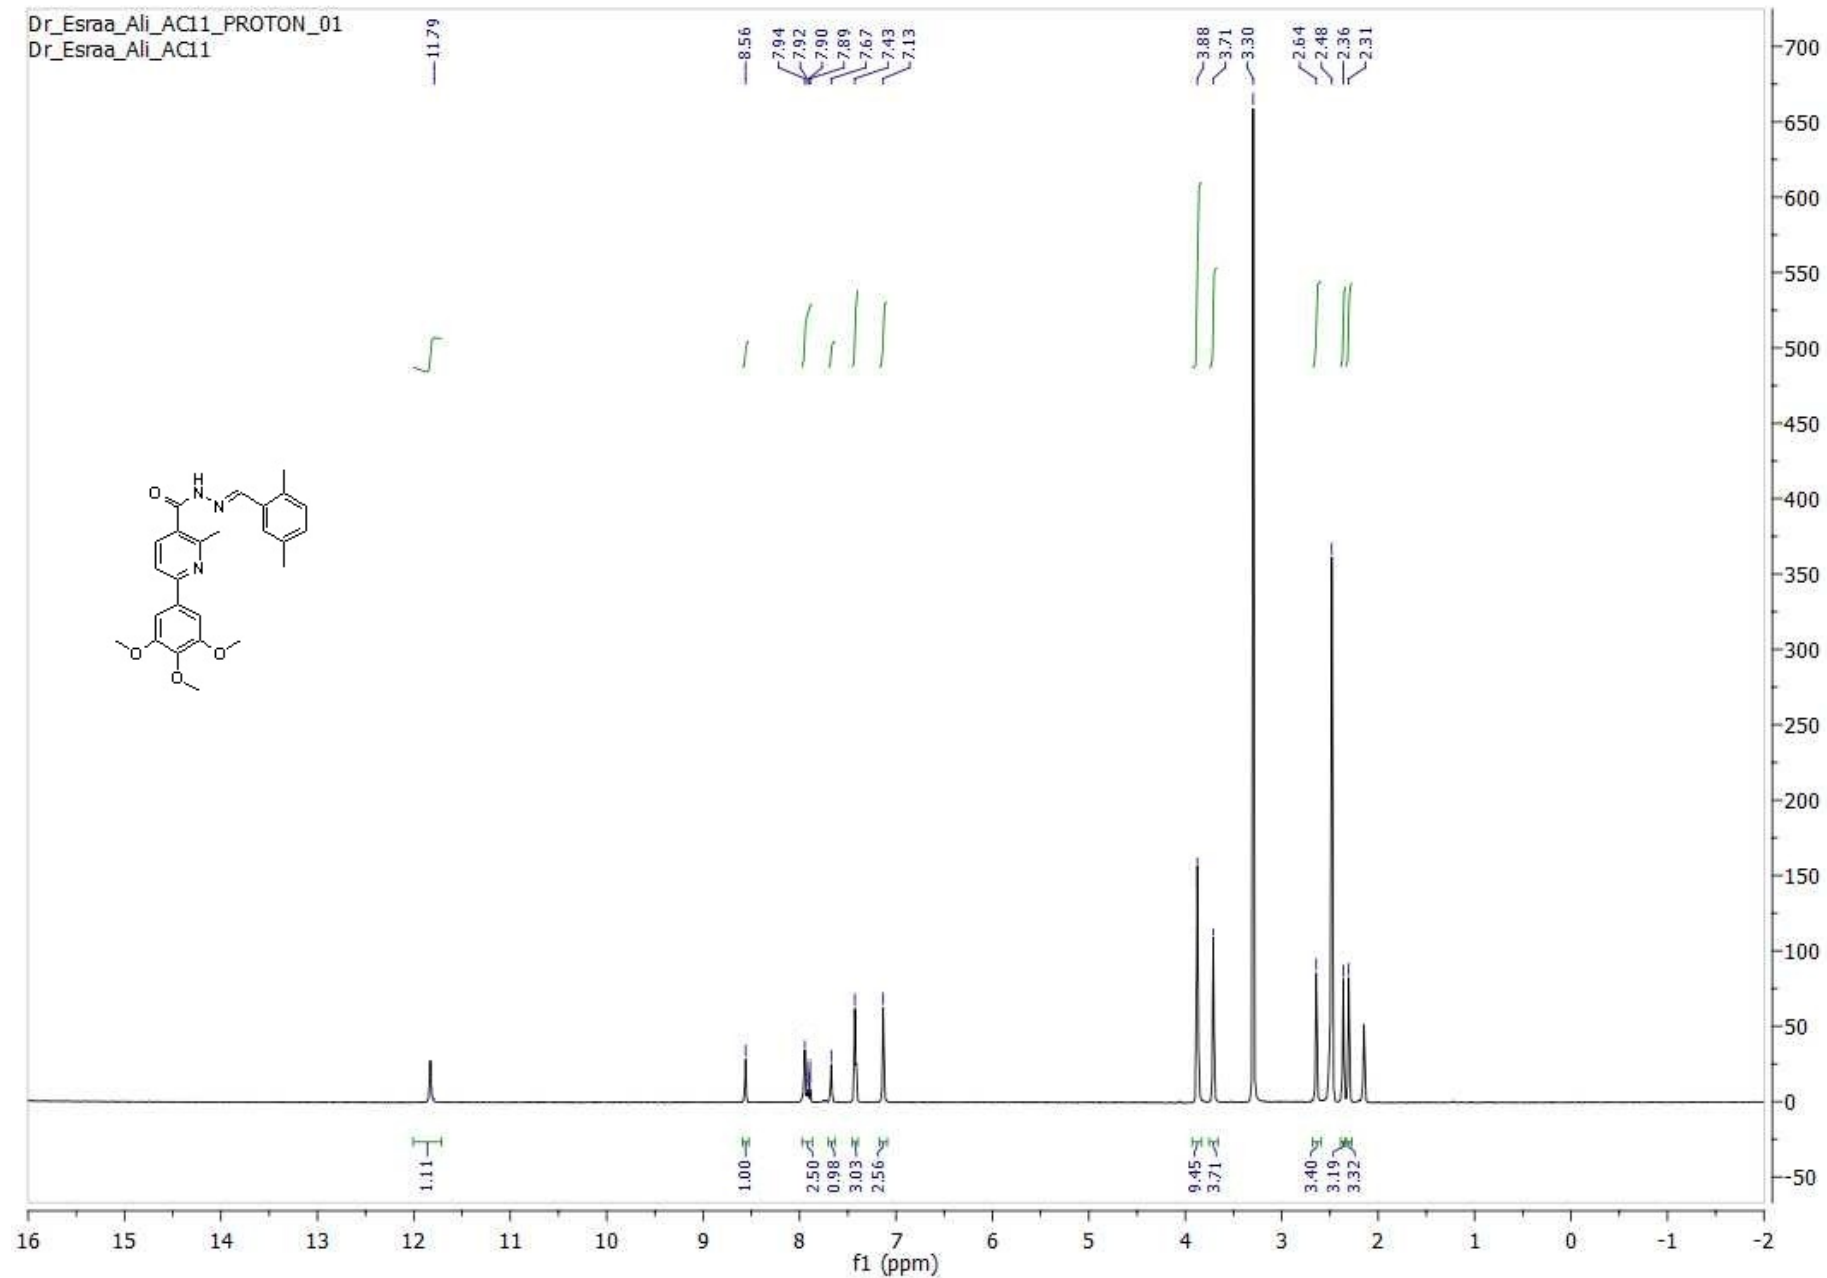



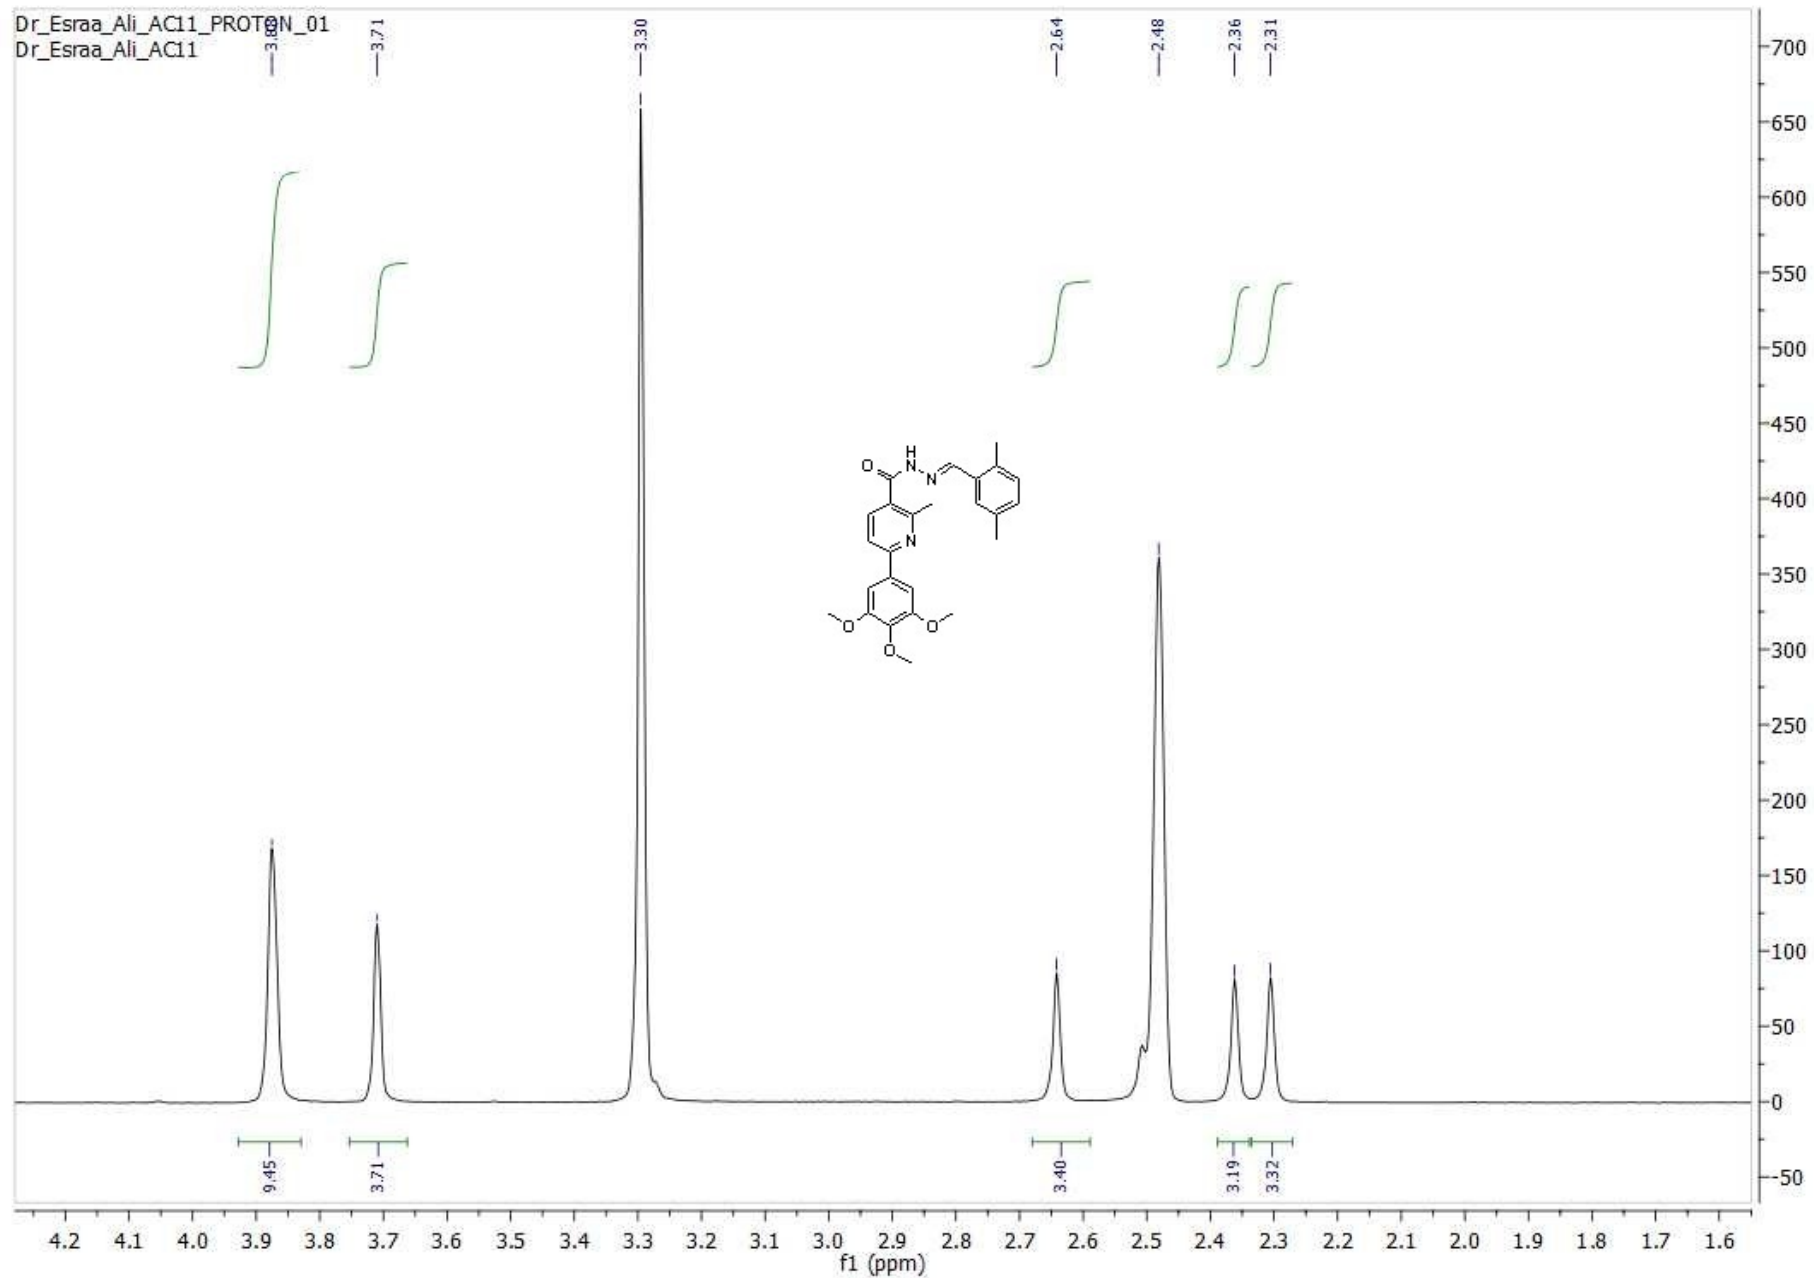

Dr\_Esraa\_Ali\_AC11\_CARBON\_01  
Dr\_Esraa\_Ali\_AC11

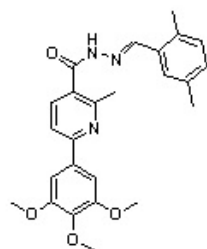

164.20  
162.88  
161.13  
160.42  
153.81  
150.02  
144.75  
142.00  
138.92  
137.12  
132.63  
131.92  
129.16  
124.99  
121.52  
117.35  
111.84

60.42  
56.56

23.64  
21.83  
19.08

2400  
2300  
2200  
2100  
2000  
1900  
1800  
1700  
1600  
1500  
1400  
1300  
1200  
1100  
1000  
900  
800  
700  
600  
500  
400  
300  
200  
100  
0  
-100  
-200

230 220 210 200 190 180 170 160 150 140 130 120 110 100 90 80 70 60 50 40 30 20 10 0 -10  
f1 (ppm)

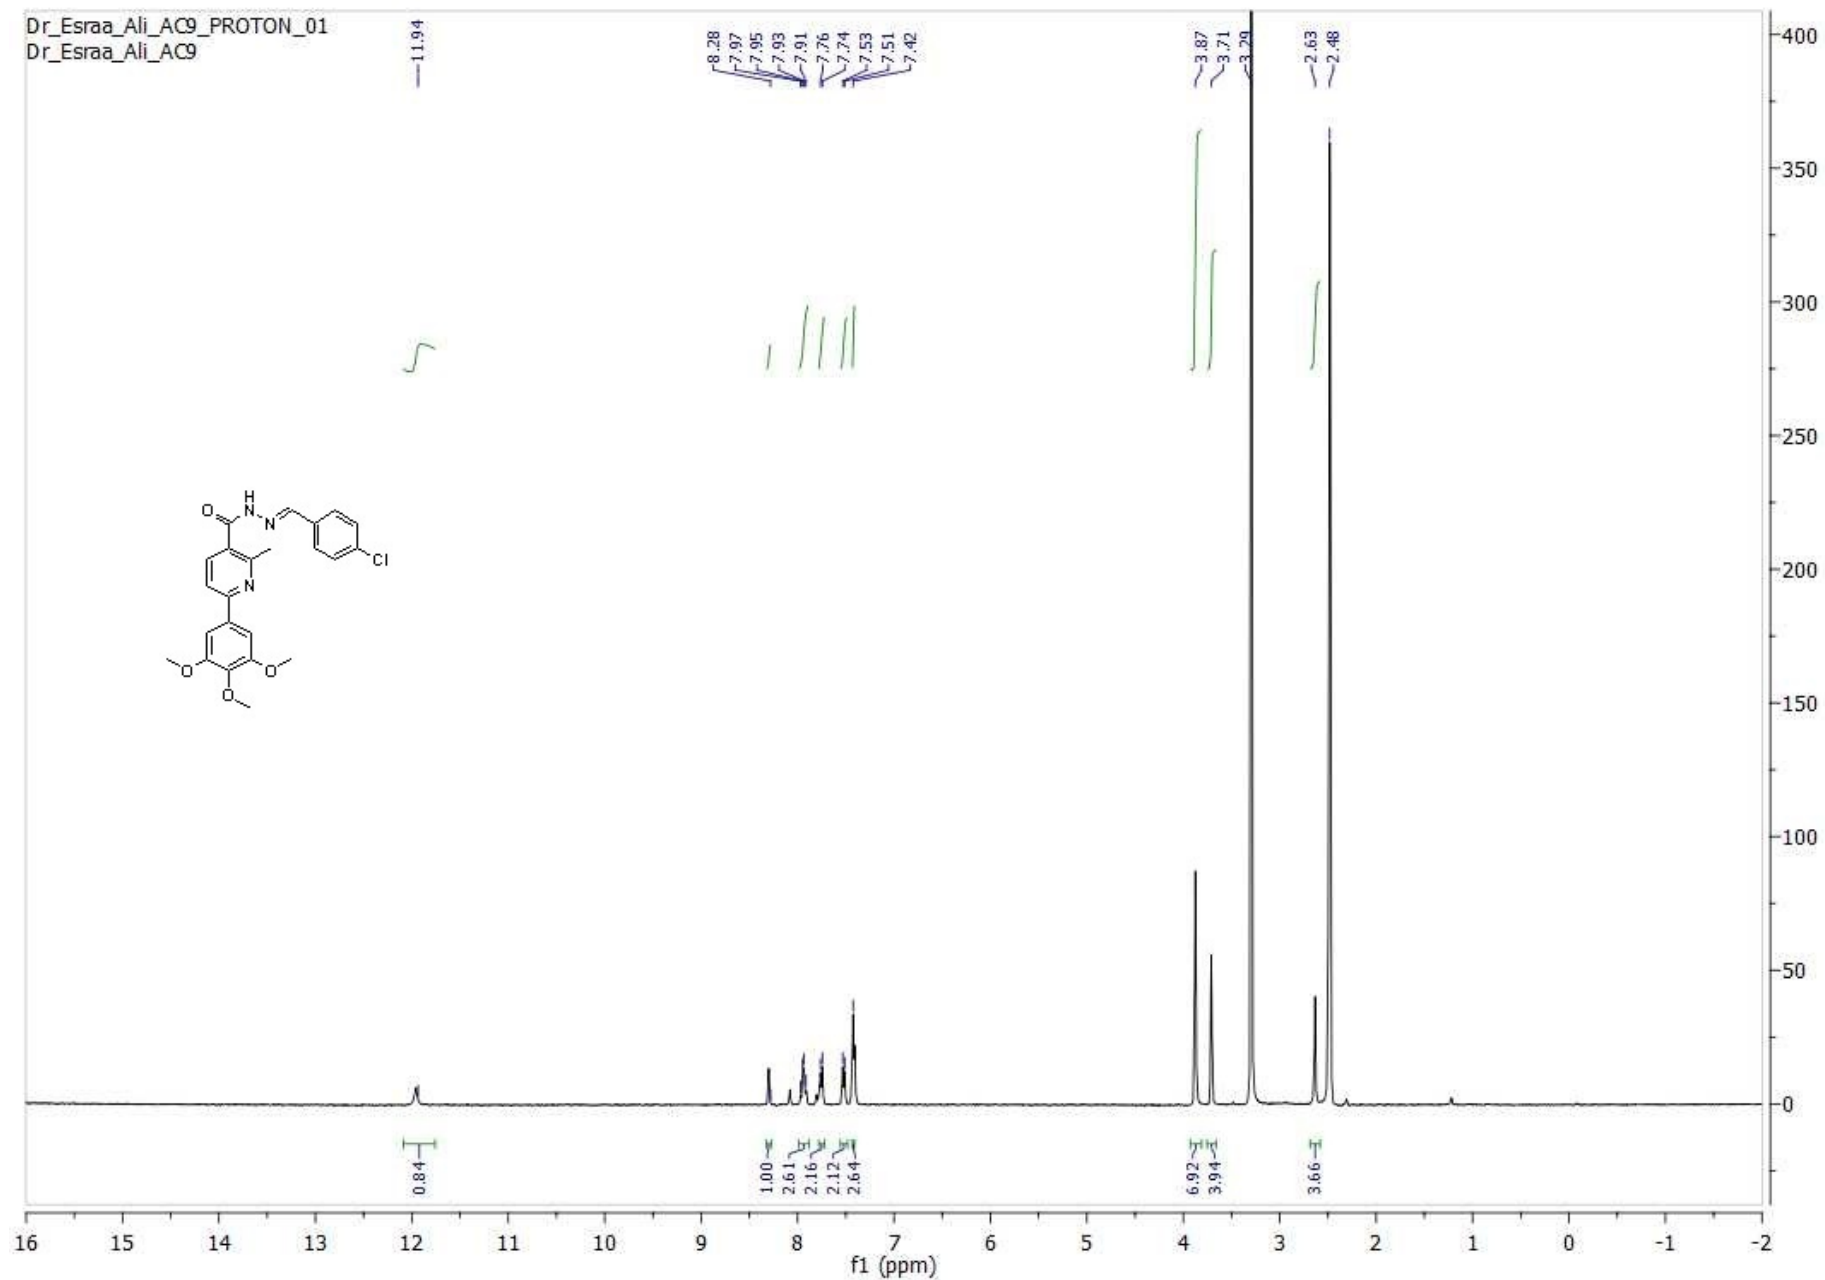

Dr\_Esraa\_Ali\_AC9\_CARBON\_01  
Dr\_Esraa\_Ali\_AC9

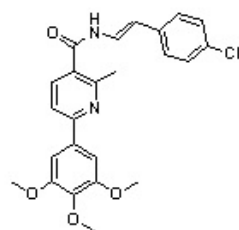

164.21  
159.71  
158.69  
153.49  
148.60  
145.15  
139.24  
136.09  
130.89  
129.15  
122.55  
118.06  
112.15  
106.25  
104.83

60.73  
56.24

23.25

3000  
2800  
2600  
2400  
2200  
2000  
1800  
1600  
1400  
1200  
1000  
800  
600  
400  
200  
0  
-200

230 220 210 200 190 180 170 160 150 140 130 120 110 100 90 80 70 60 50 40 30 20 10 0 -10  
f1 (ppm)

Dr\_Esraa\_Ali\_AC16\_PROTON\_01  
Dr\_Esraa\_Ali\_AC16

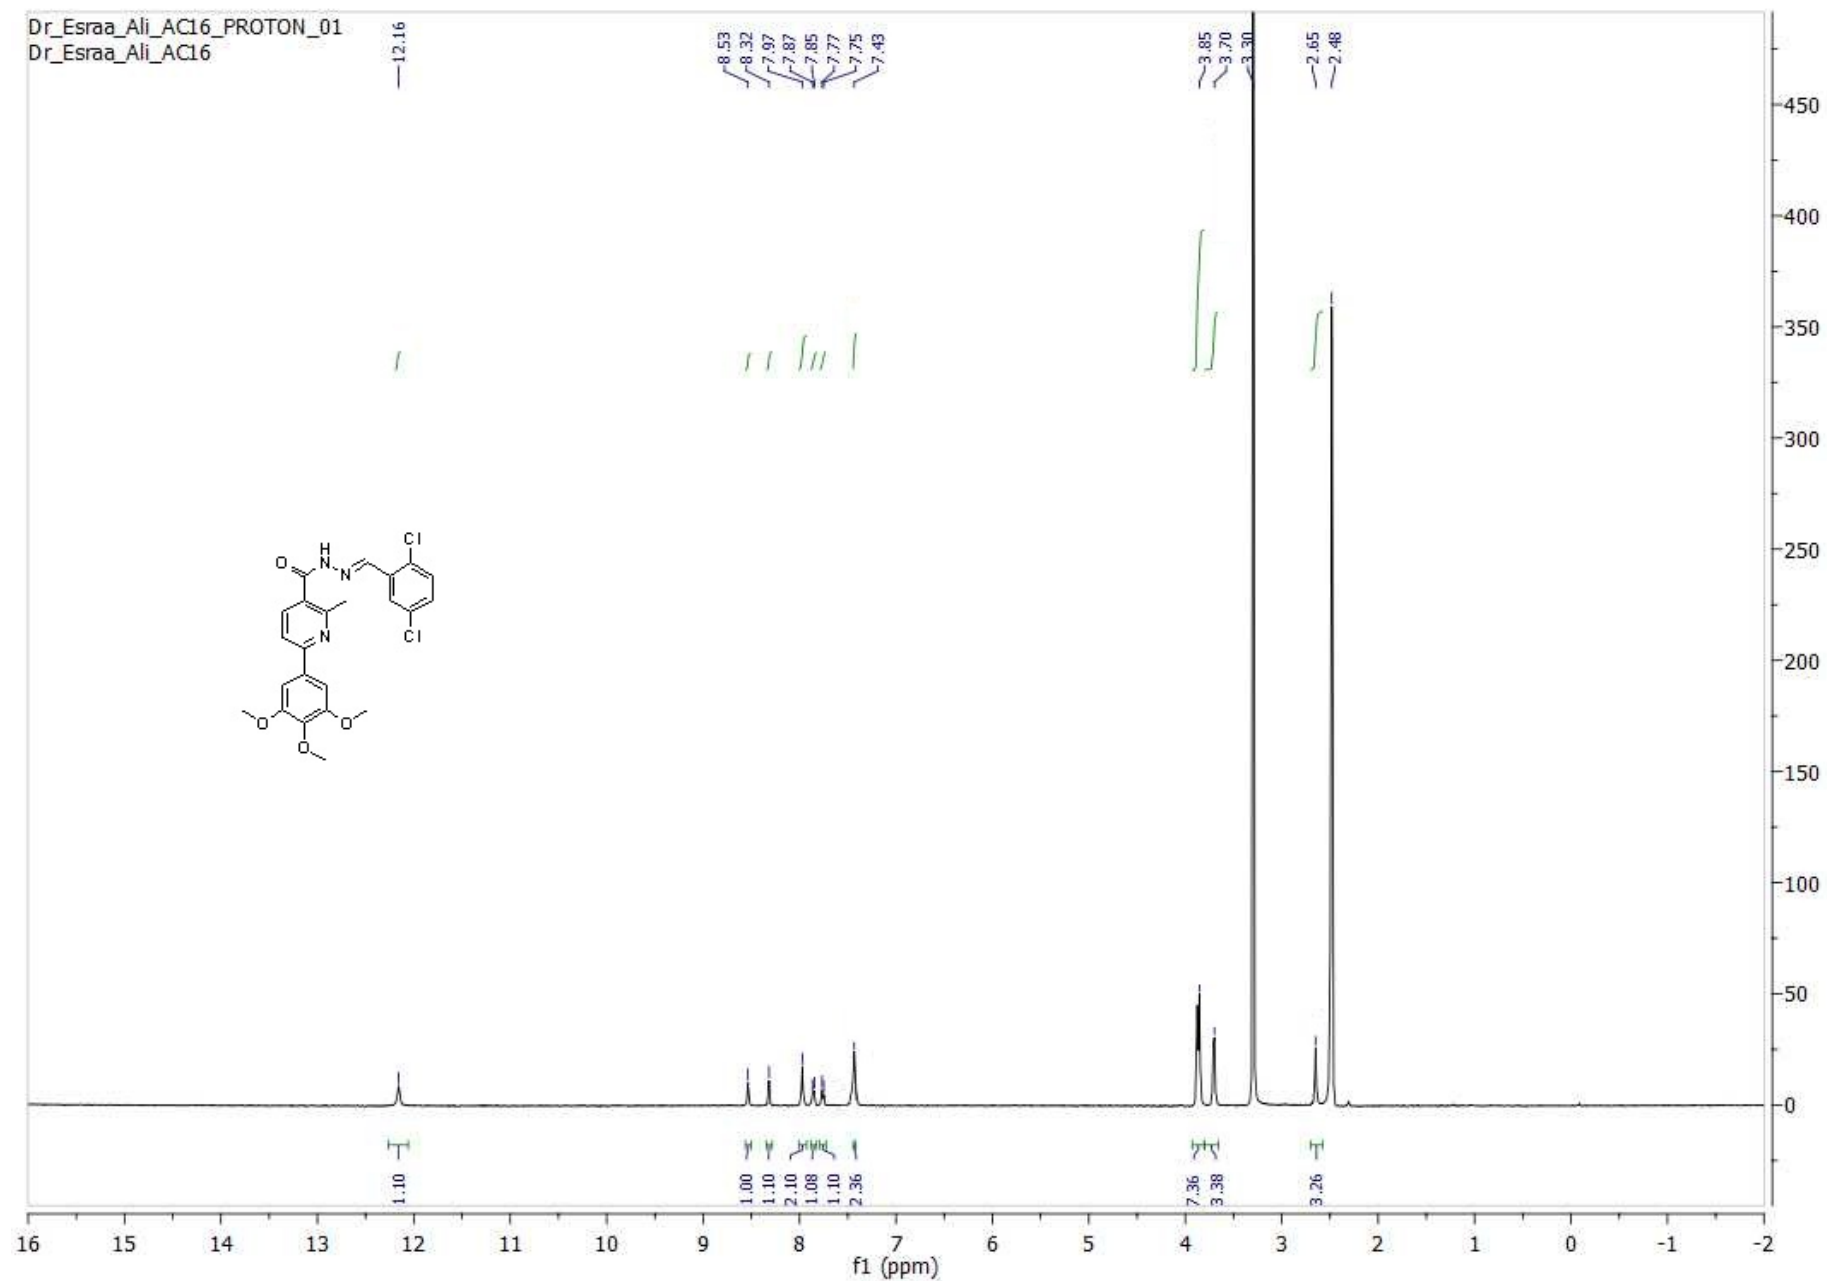

Dr\_Esraa\_Ali\_AC16\_CARBO16\_01  
Dr\_Esraa\_Ali\_AC16

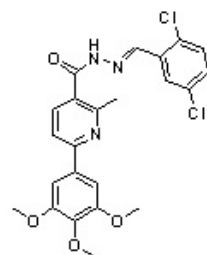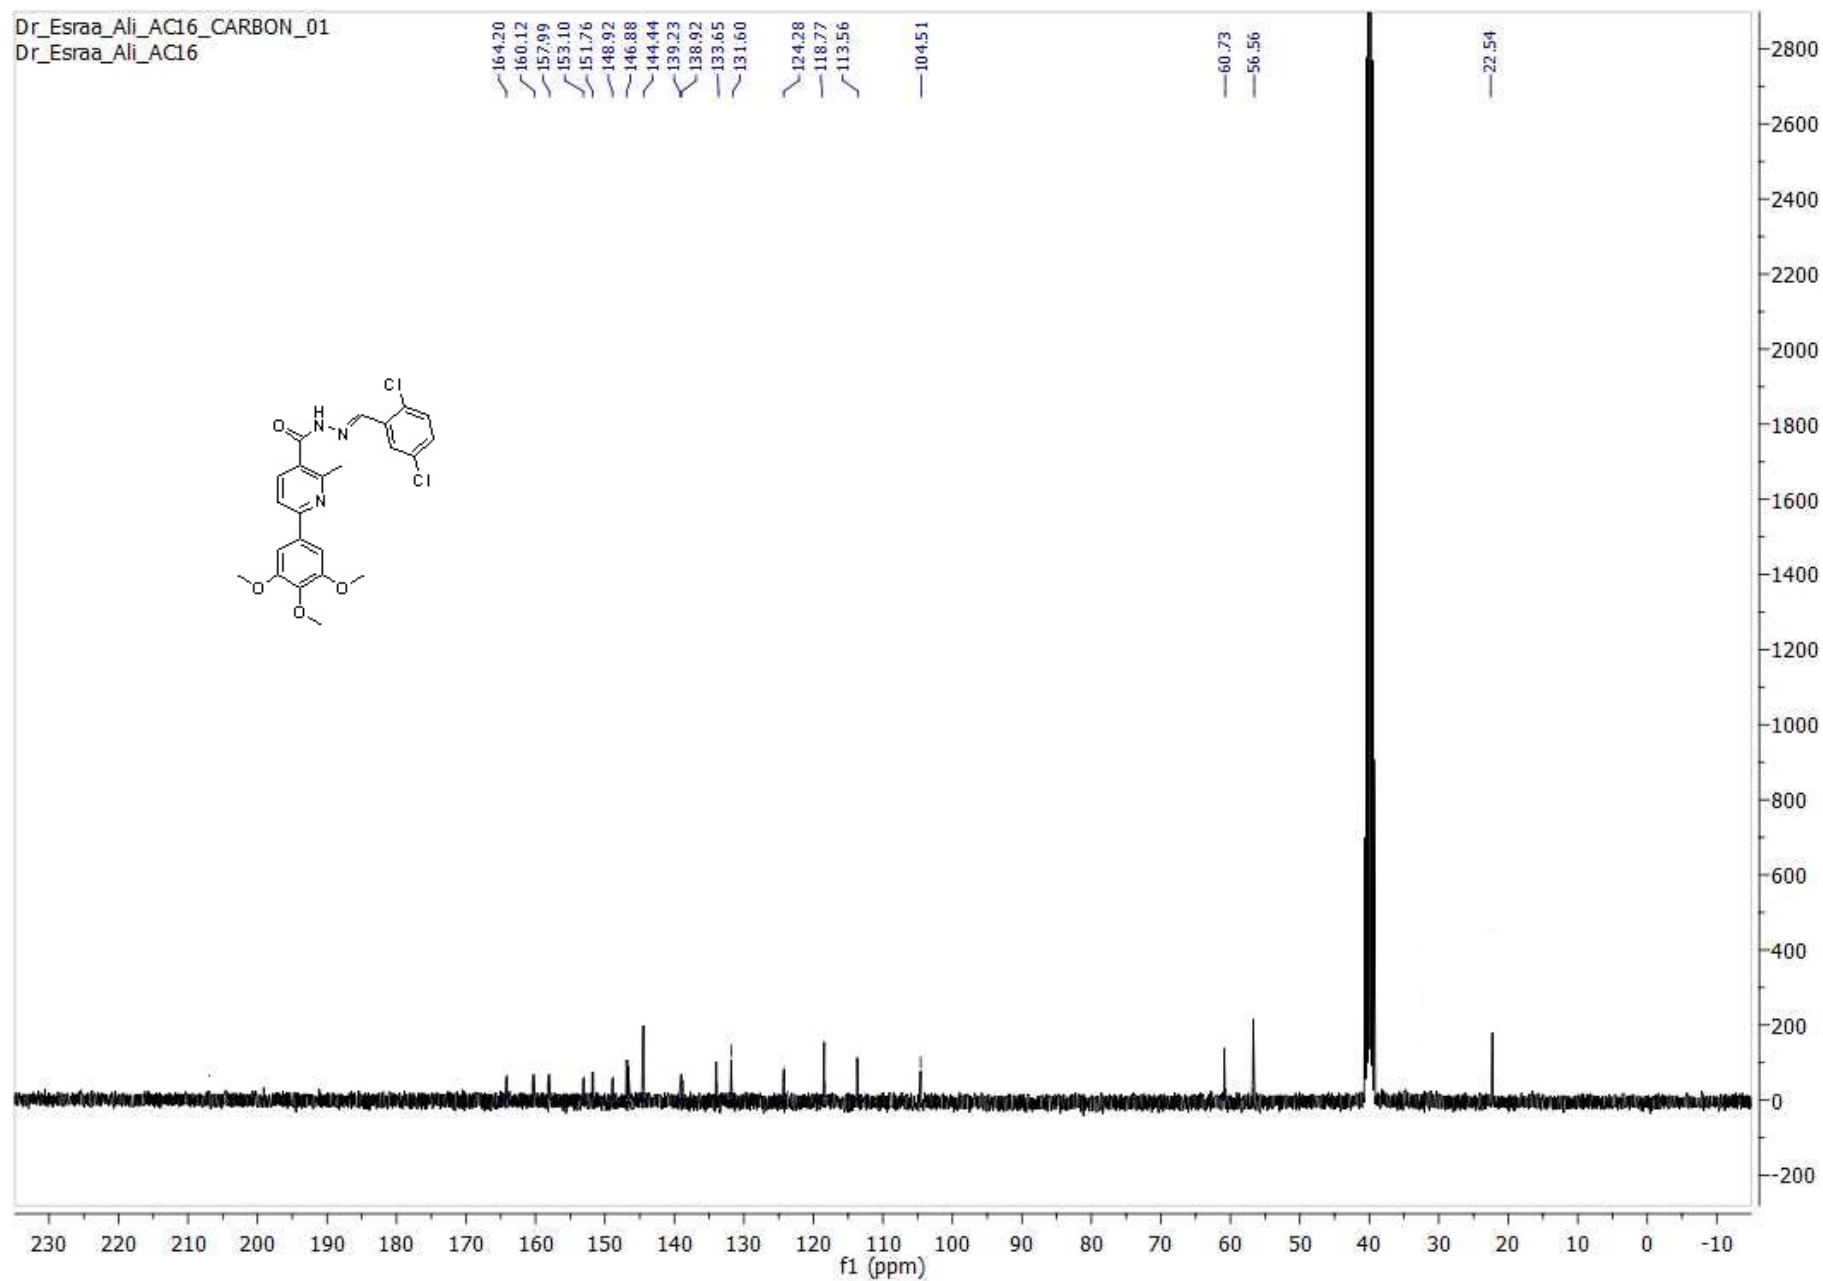

Dr\_Esraa\_Ali\_AC12\_PROTON\_01  
Dr\_Esraa\_Ali\_AC12

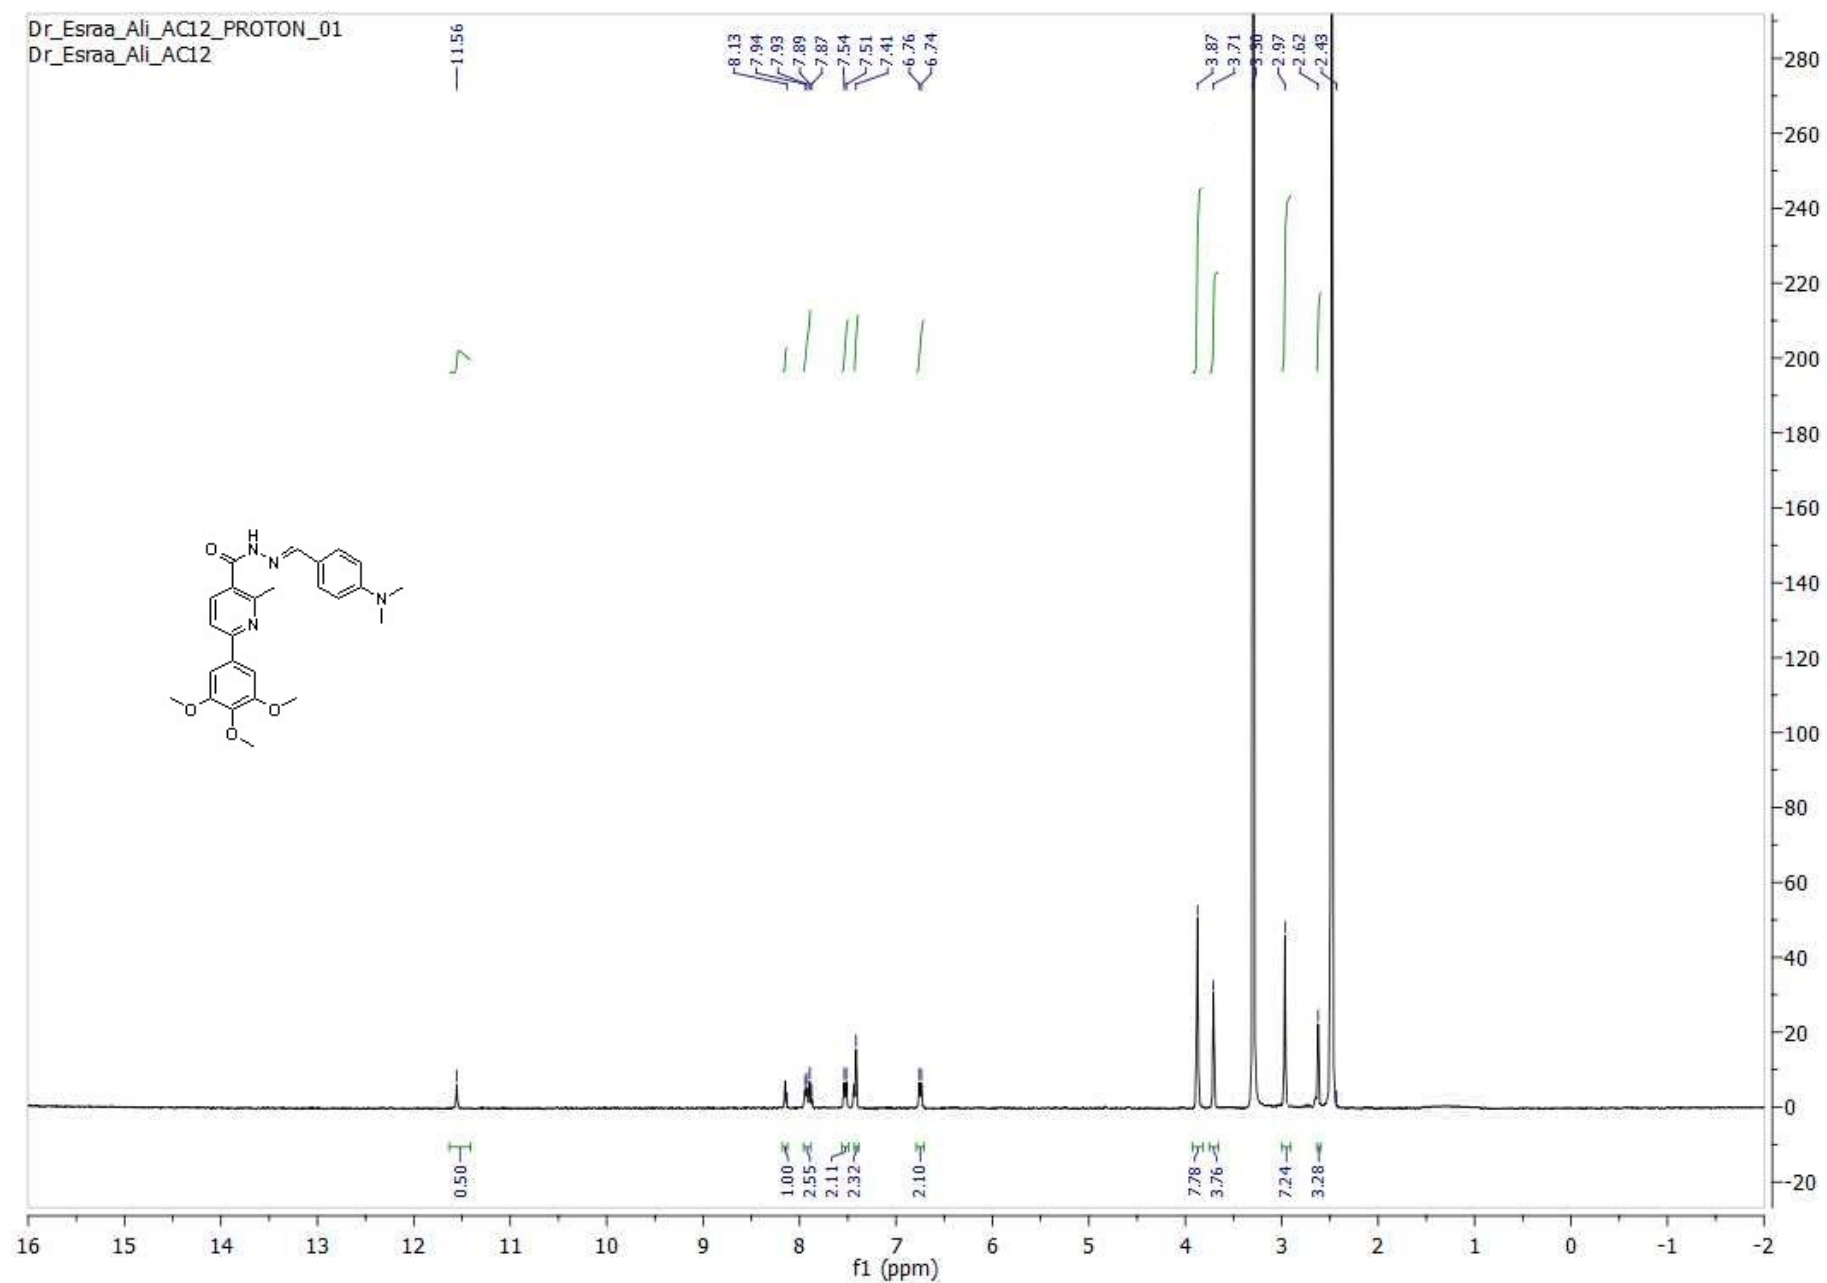

Dr\_Esraa\_Ali\_AC12\_CARBON\_02  
Dr\_Esraa\_Ali\_AC12

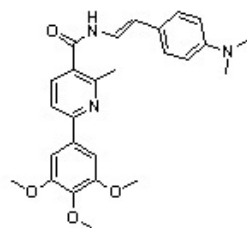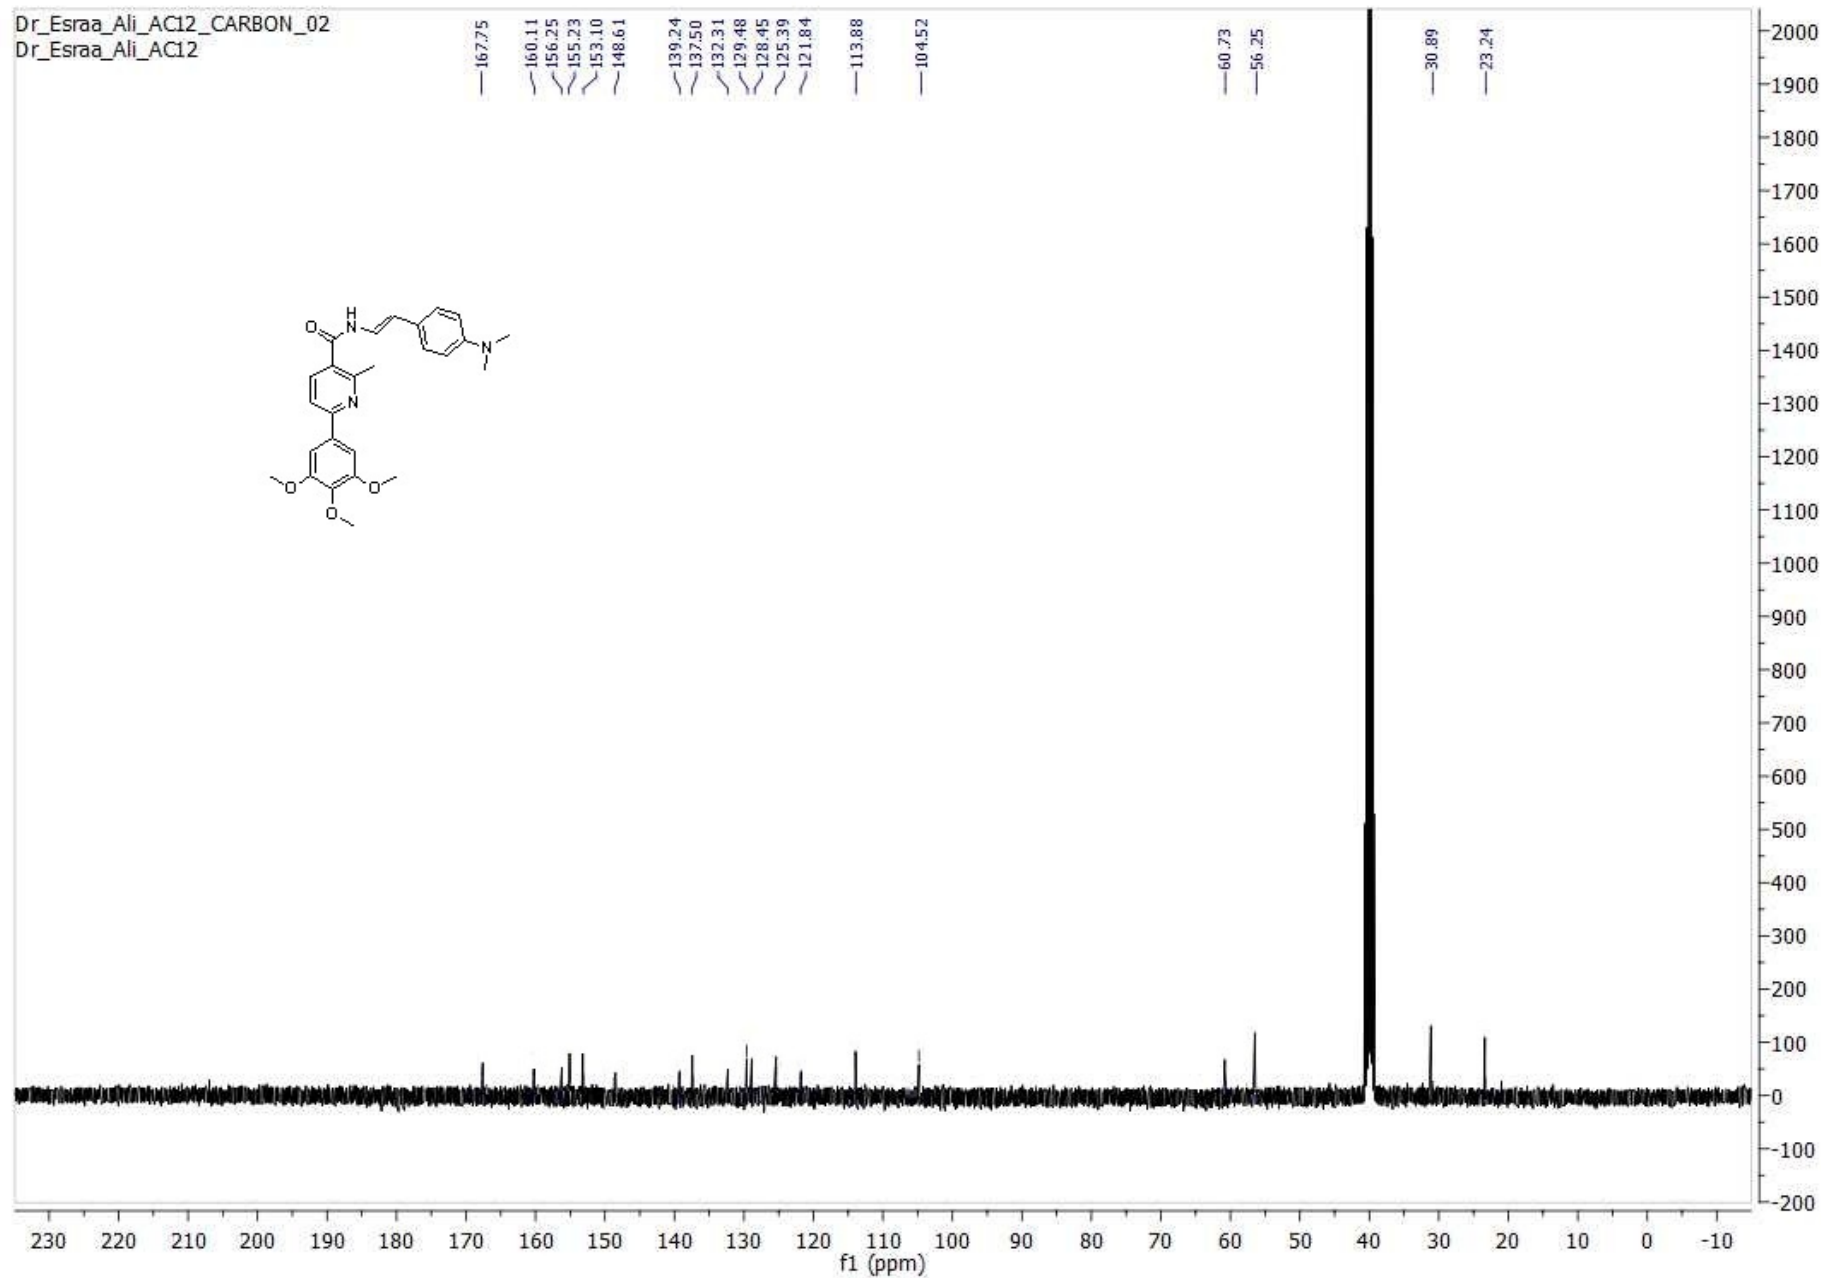



Dr\_Esraa\_Ali\_AC14\_PROTON\_01  
Dr\_Esraa\_Ali\_AC14

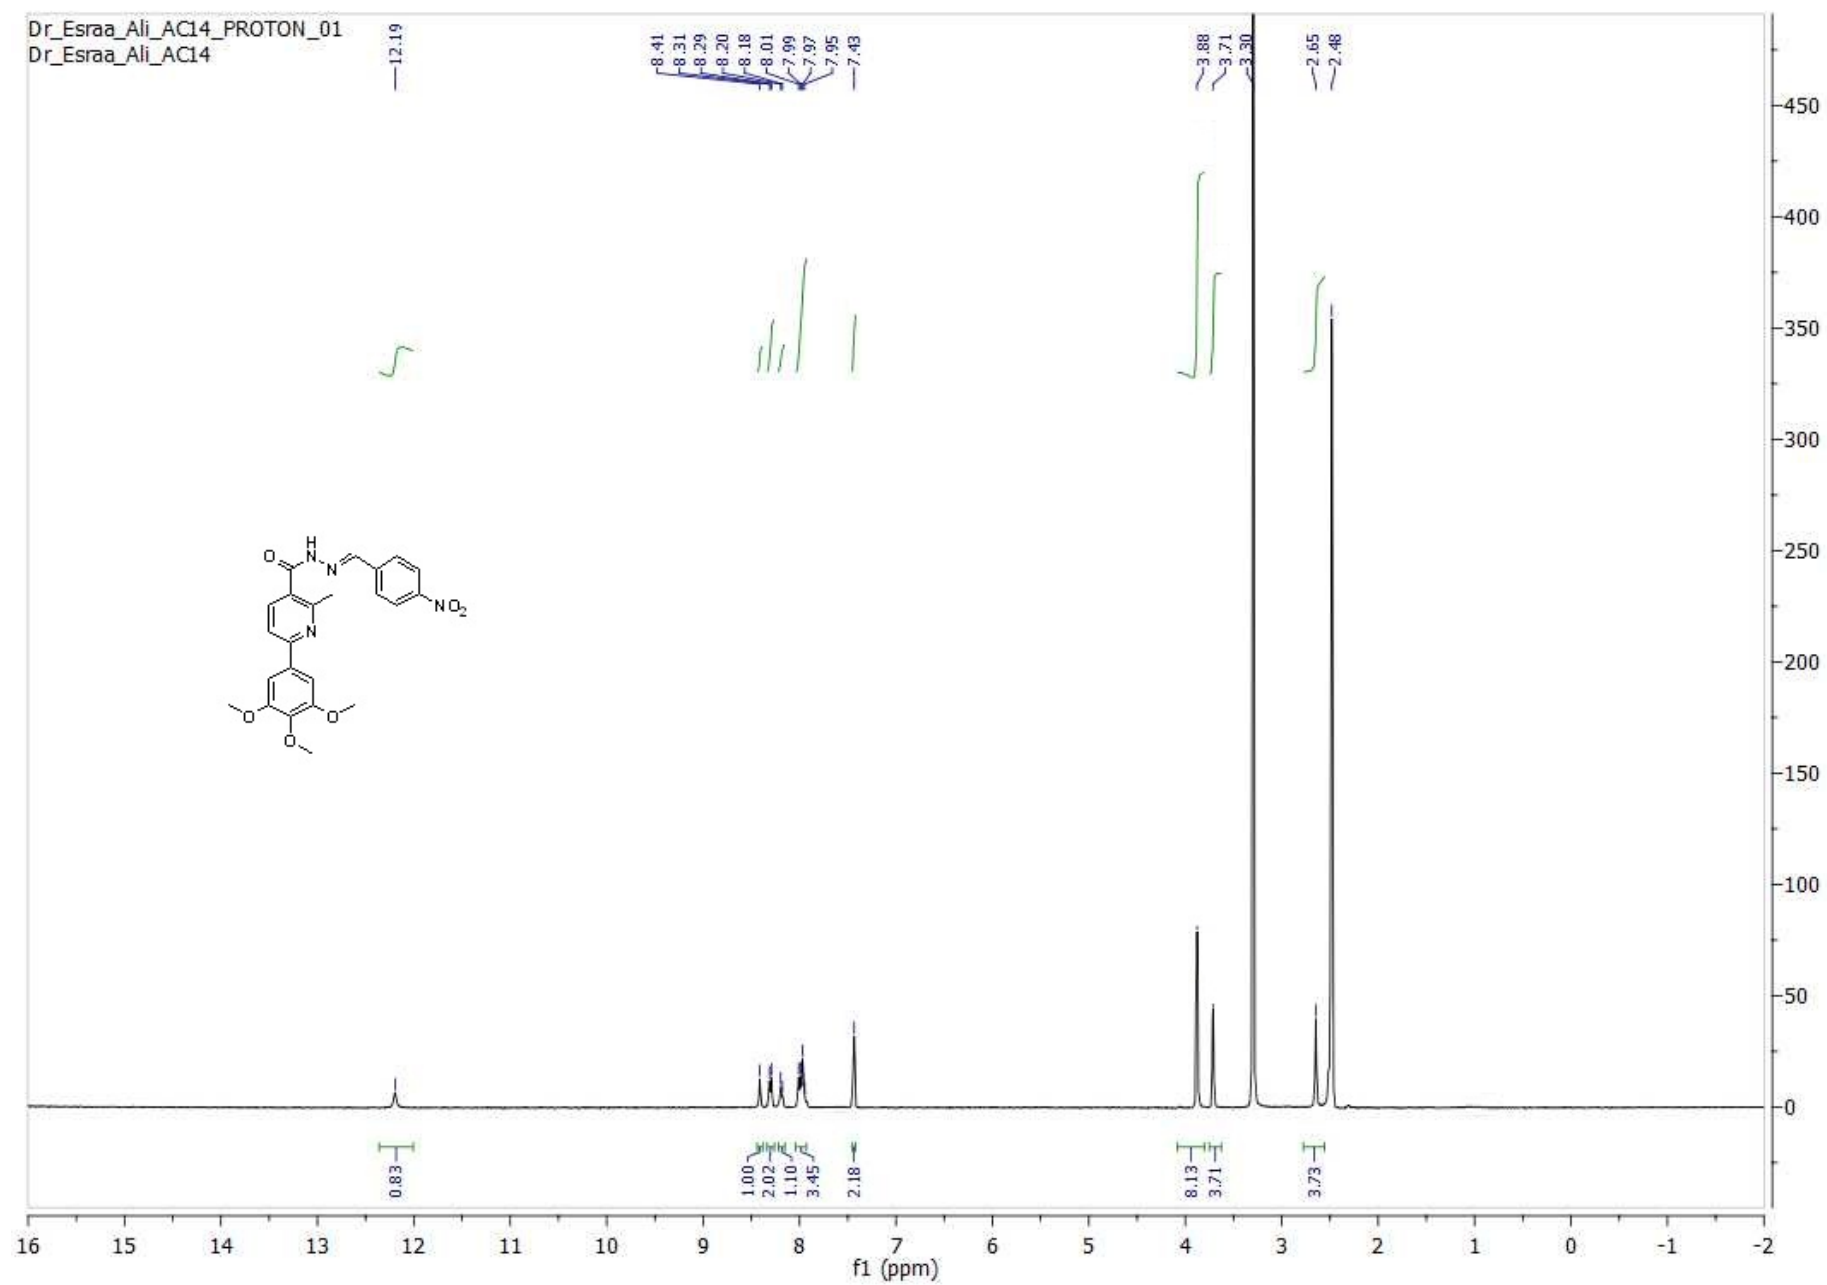

Dr\_Esraa\_Ali\_AC14\_CARBON\_01  
Dr\_Esraa\_Ali\_AC14

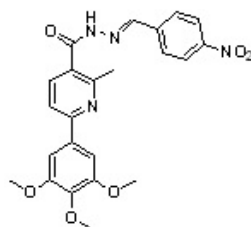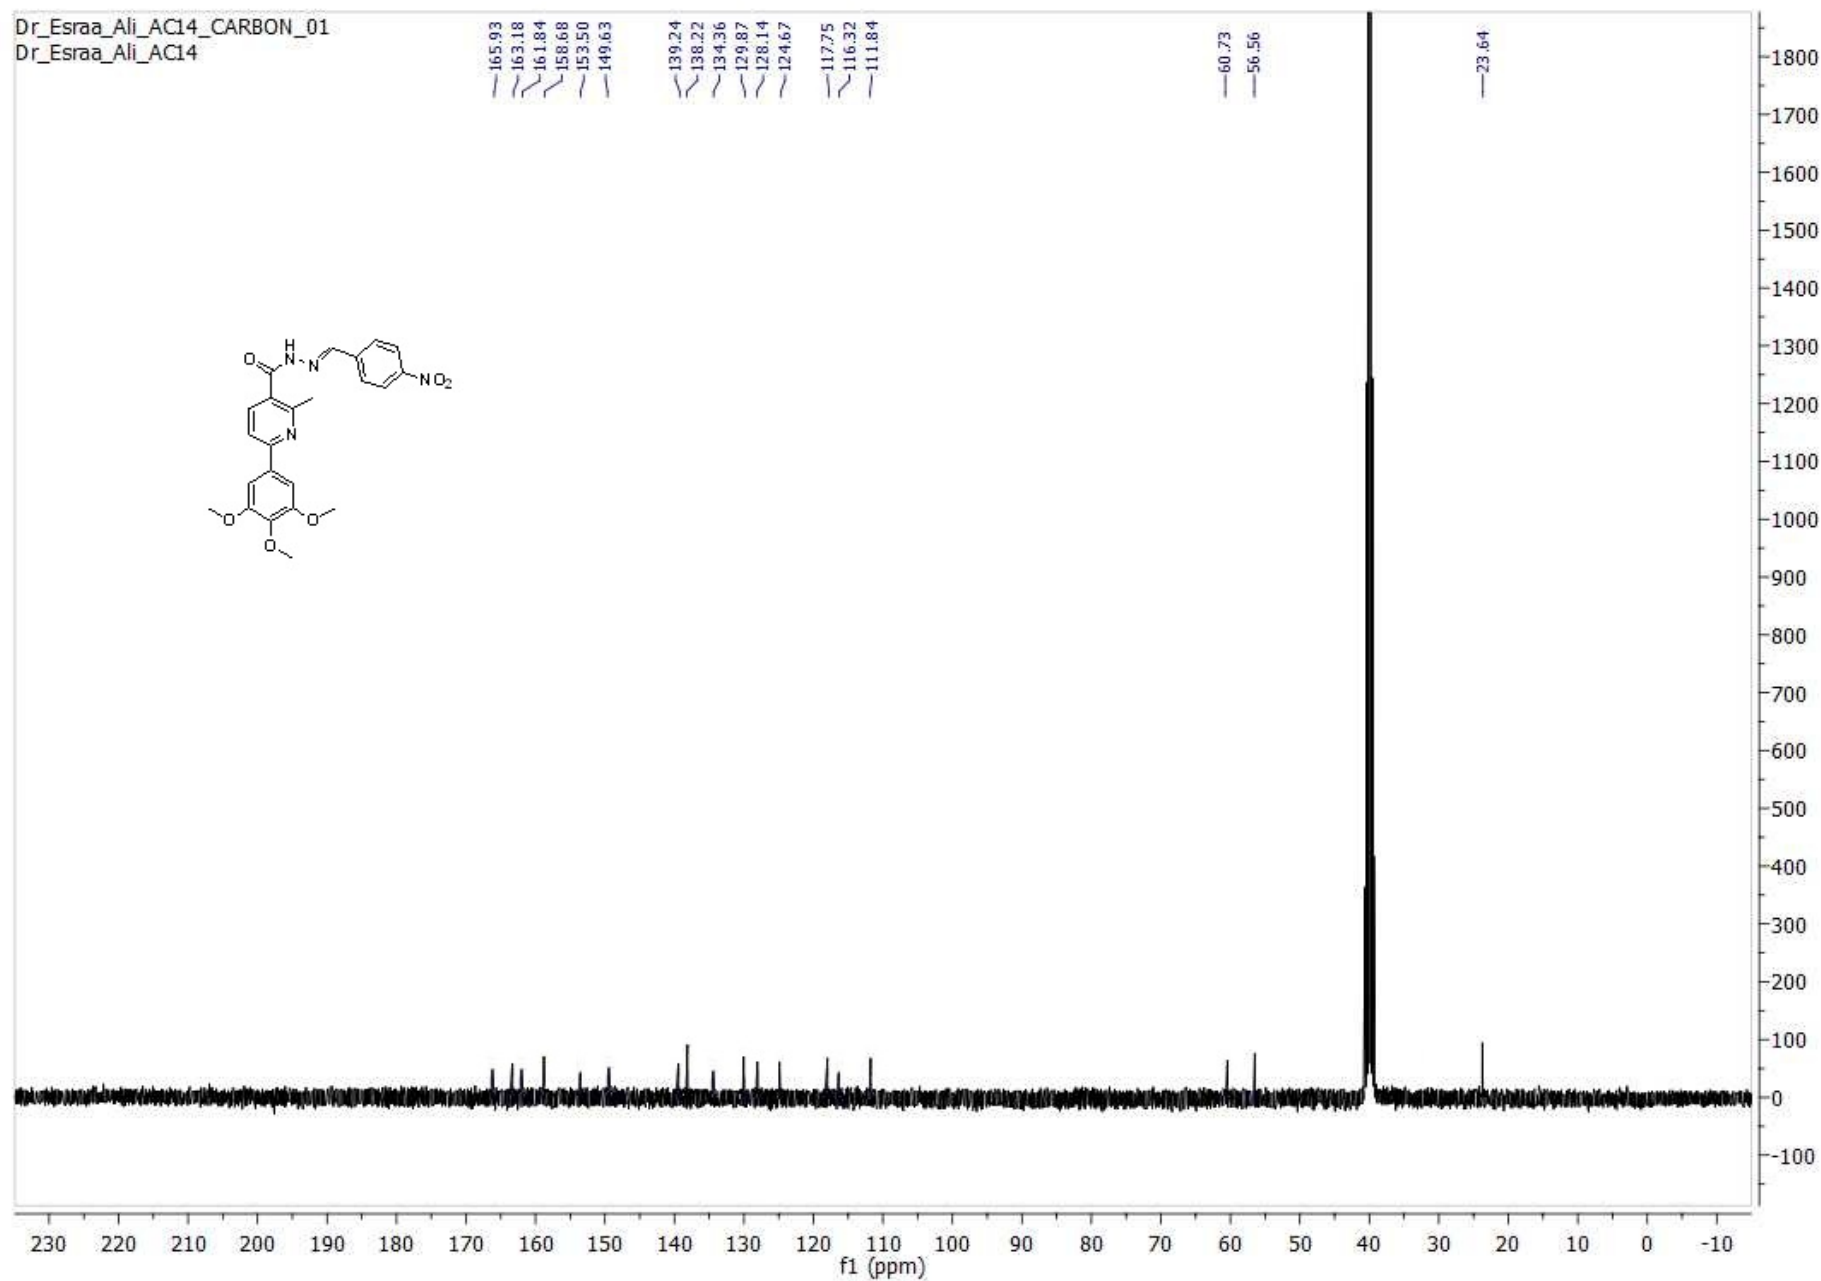

Dr\_Esraa\_Ali\_AC15\_PROTON\_01  
Dr\_Esraa\_Ali\_AC15

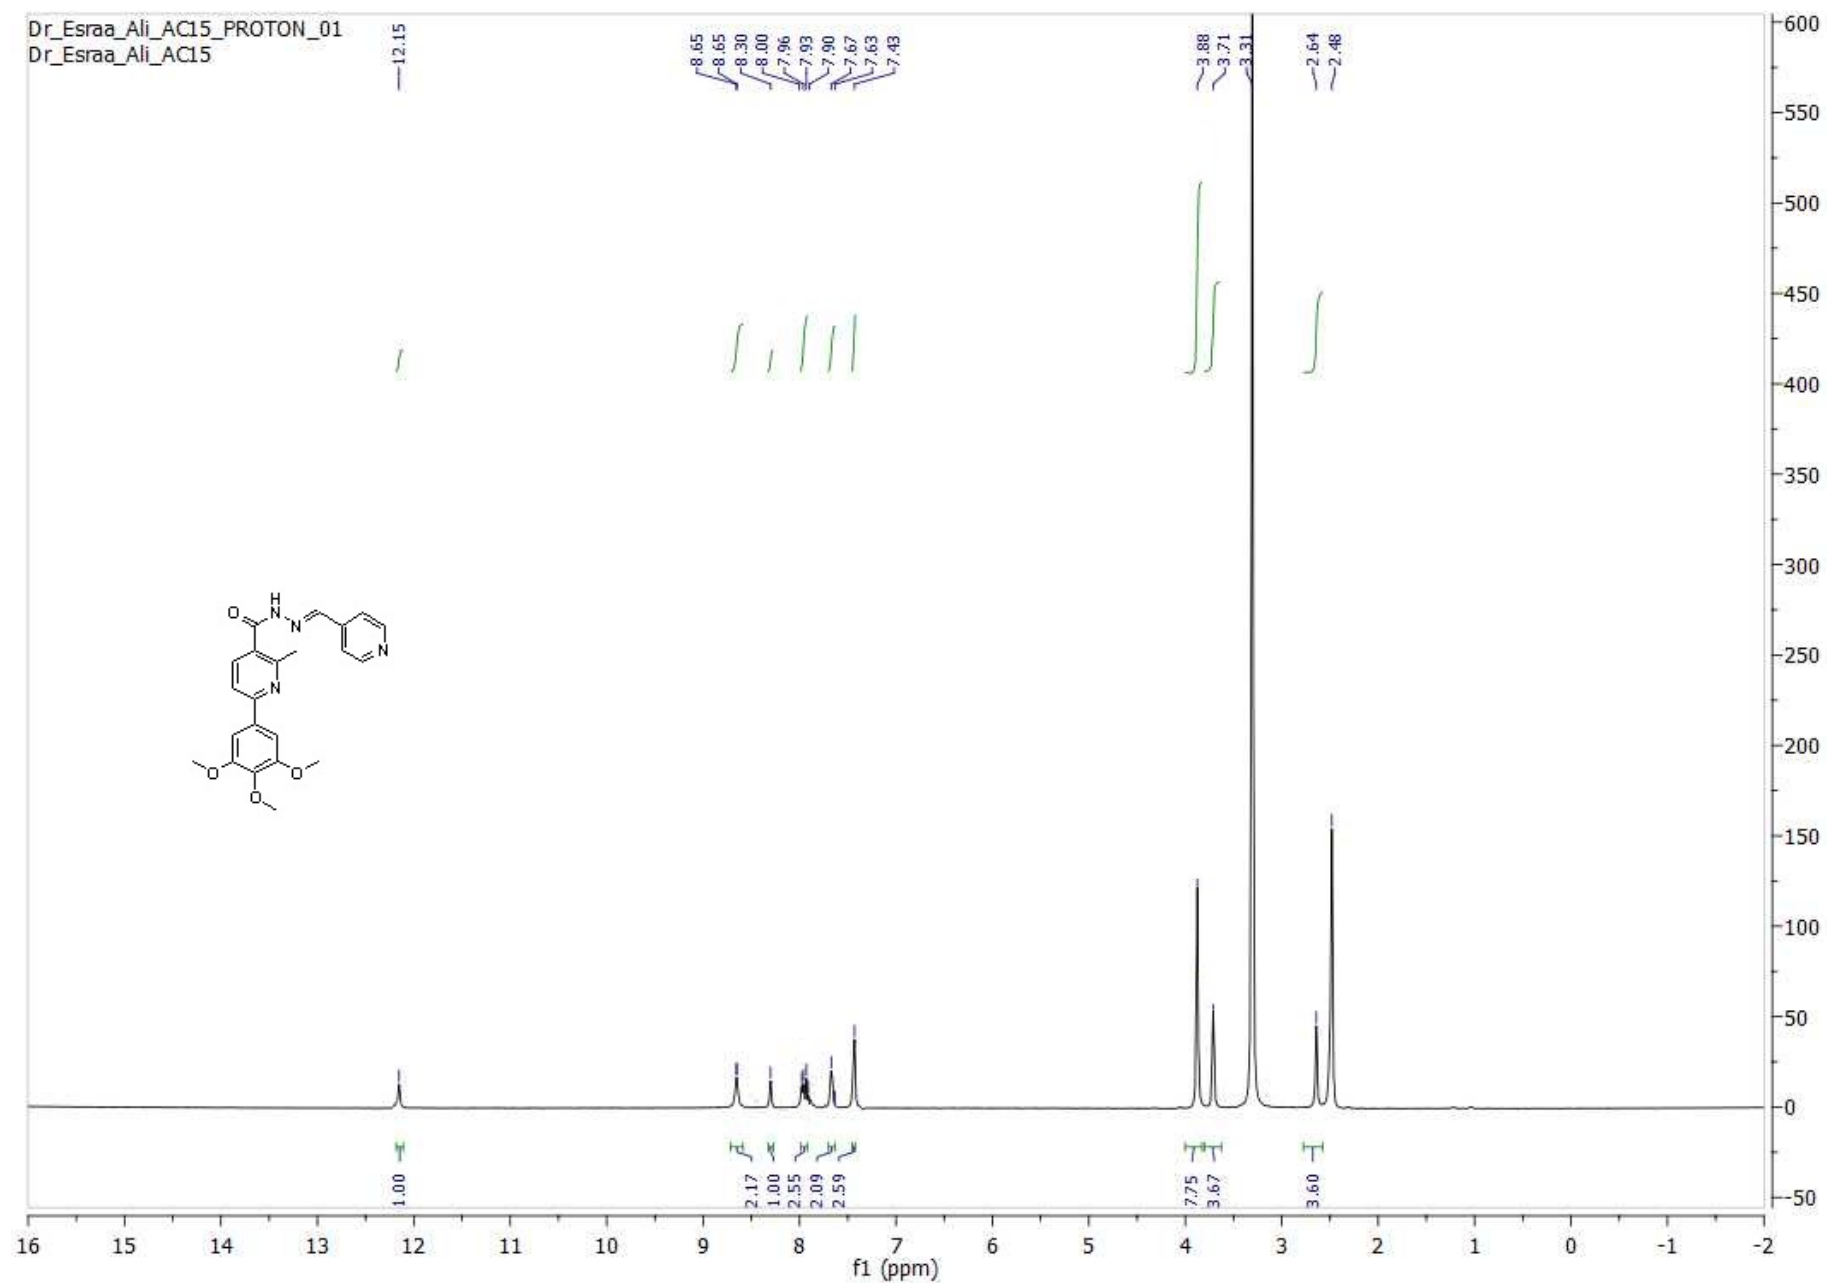

Dr\_Esraa\_Ali\_AC23\_PROTON\_01  
Dr\_Esraa\_Ali\_AC23

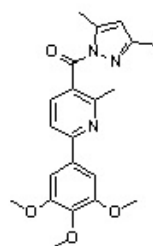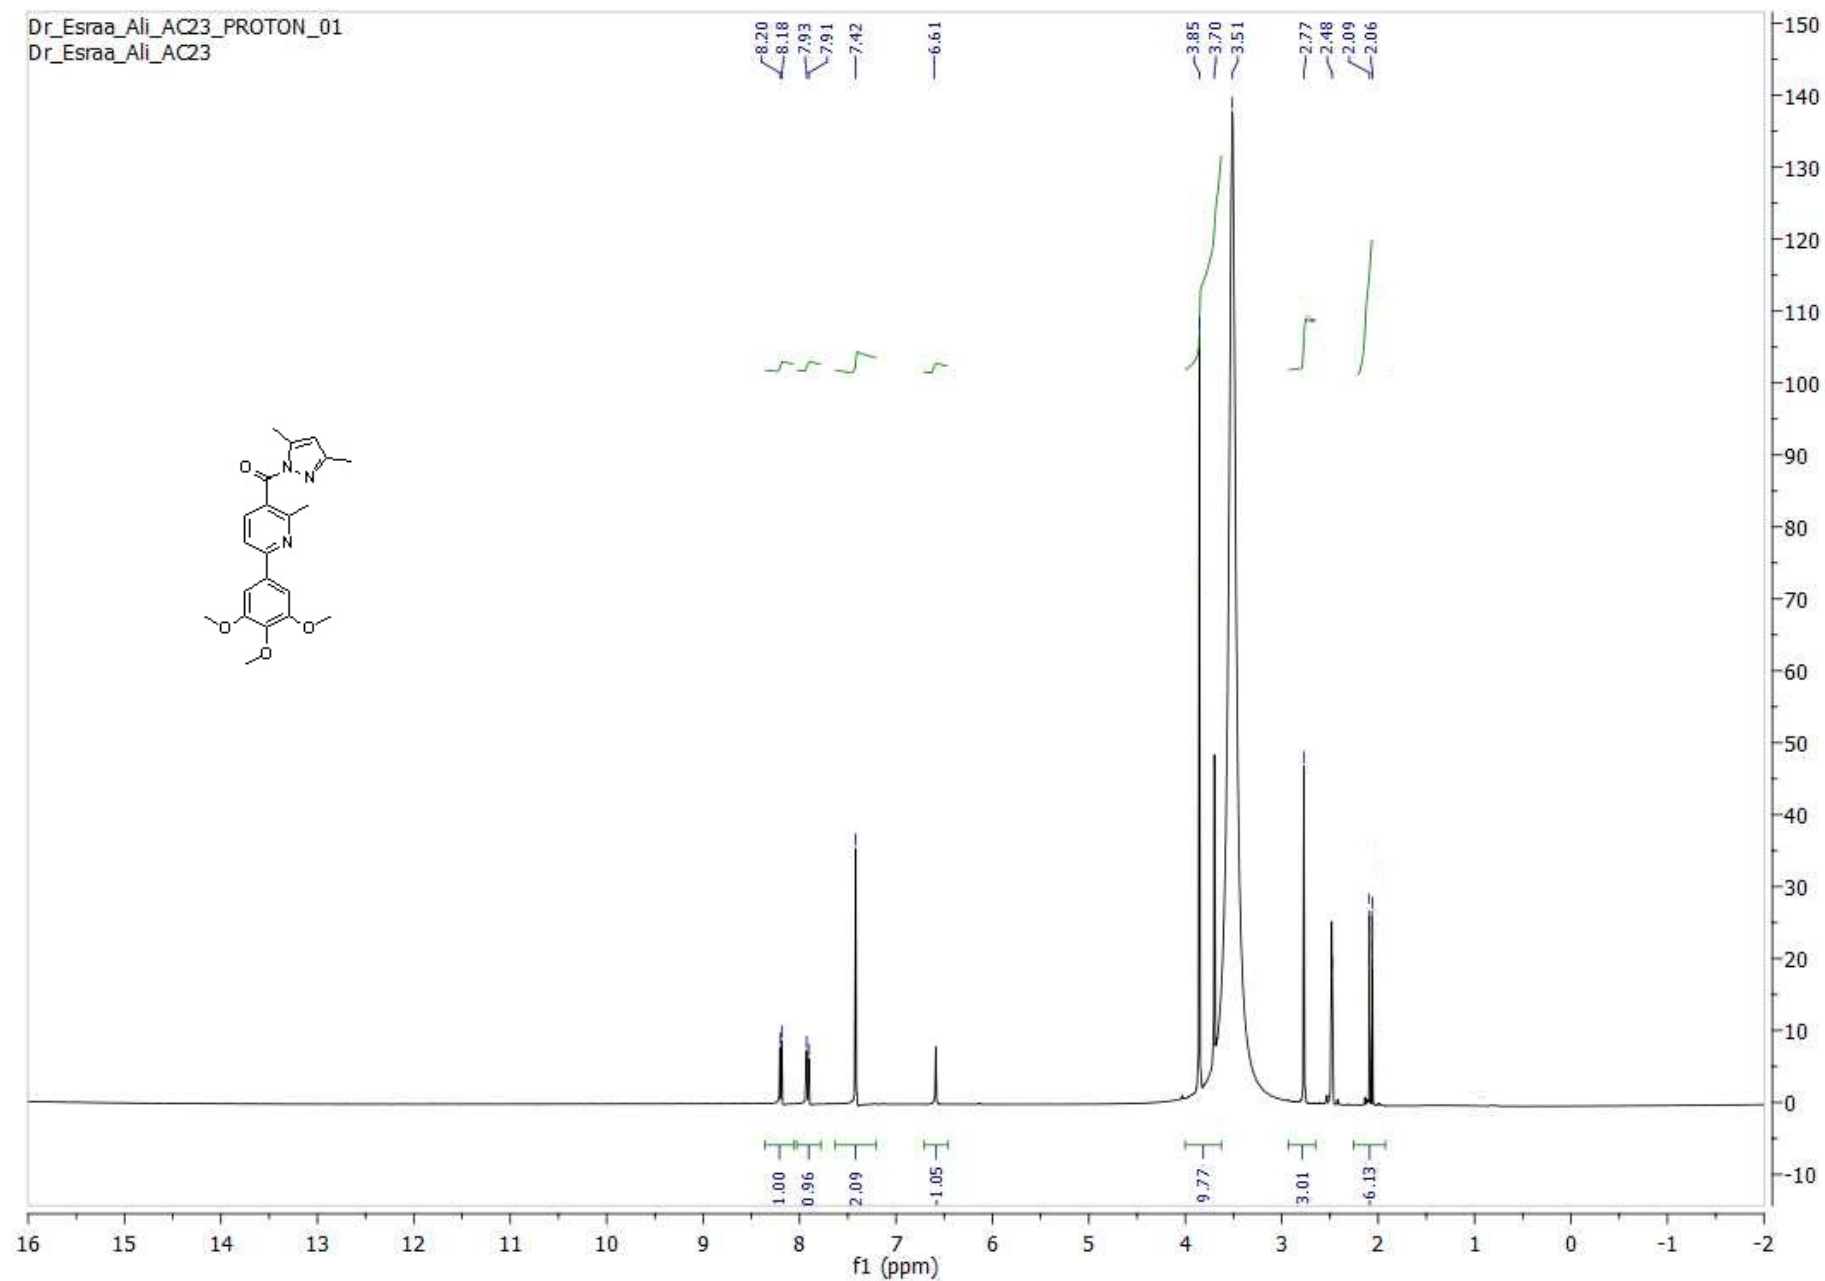

Dr\_Esraa\_Ali\_AC23\_CARBON\_01  
Dr\_Esraa\_Ali\_AC23

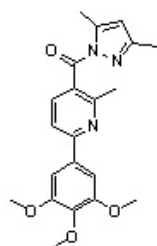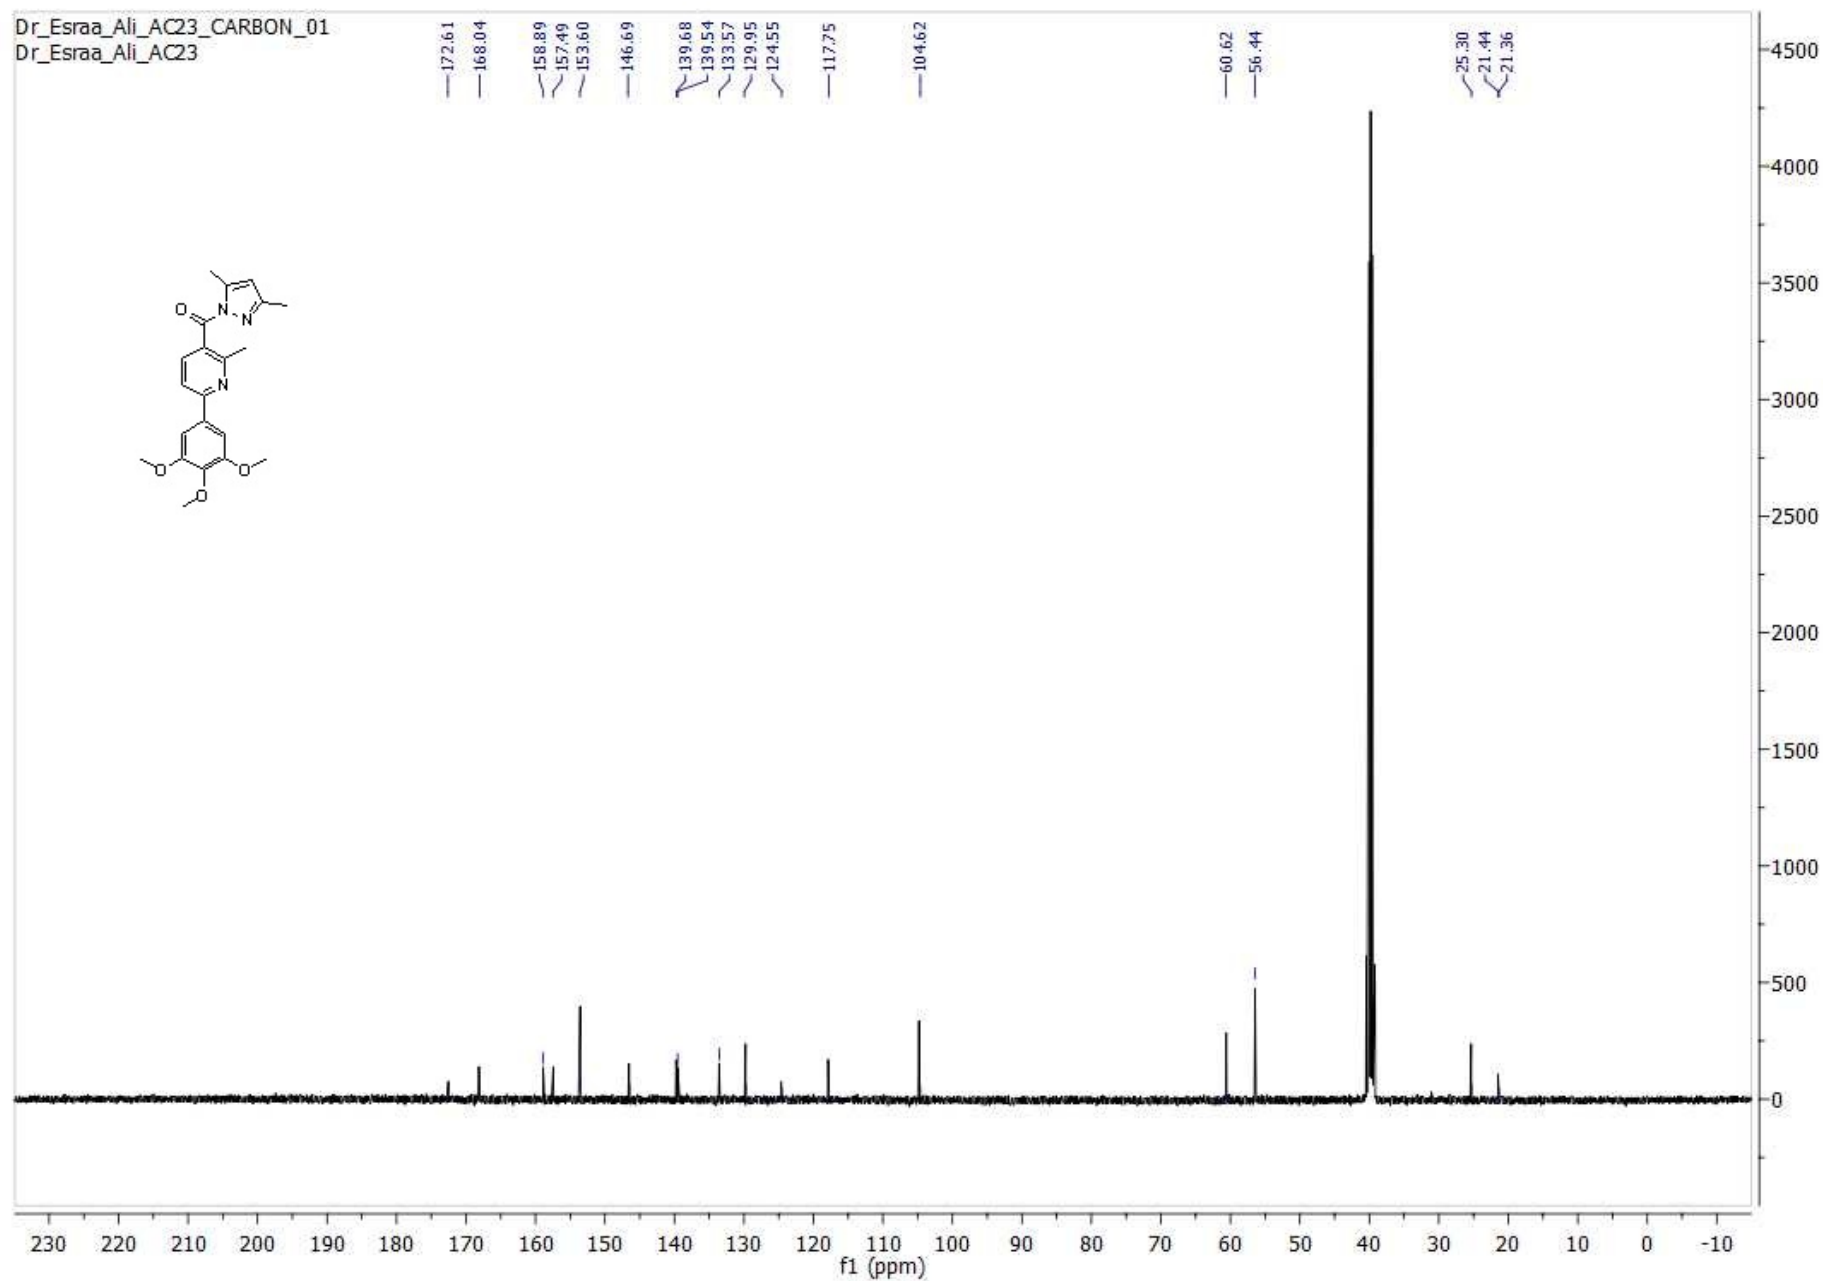

Dr\_Esraa\_Ali\_AC17\_PROTON\_01  
Dr\_Esraa\_Ali\_AC17

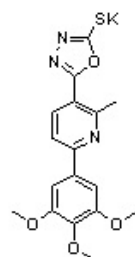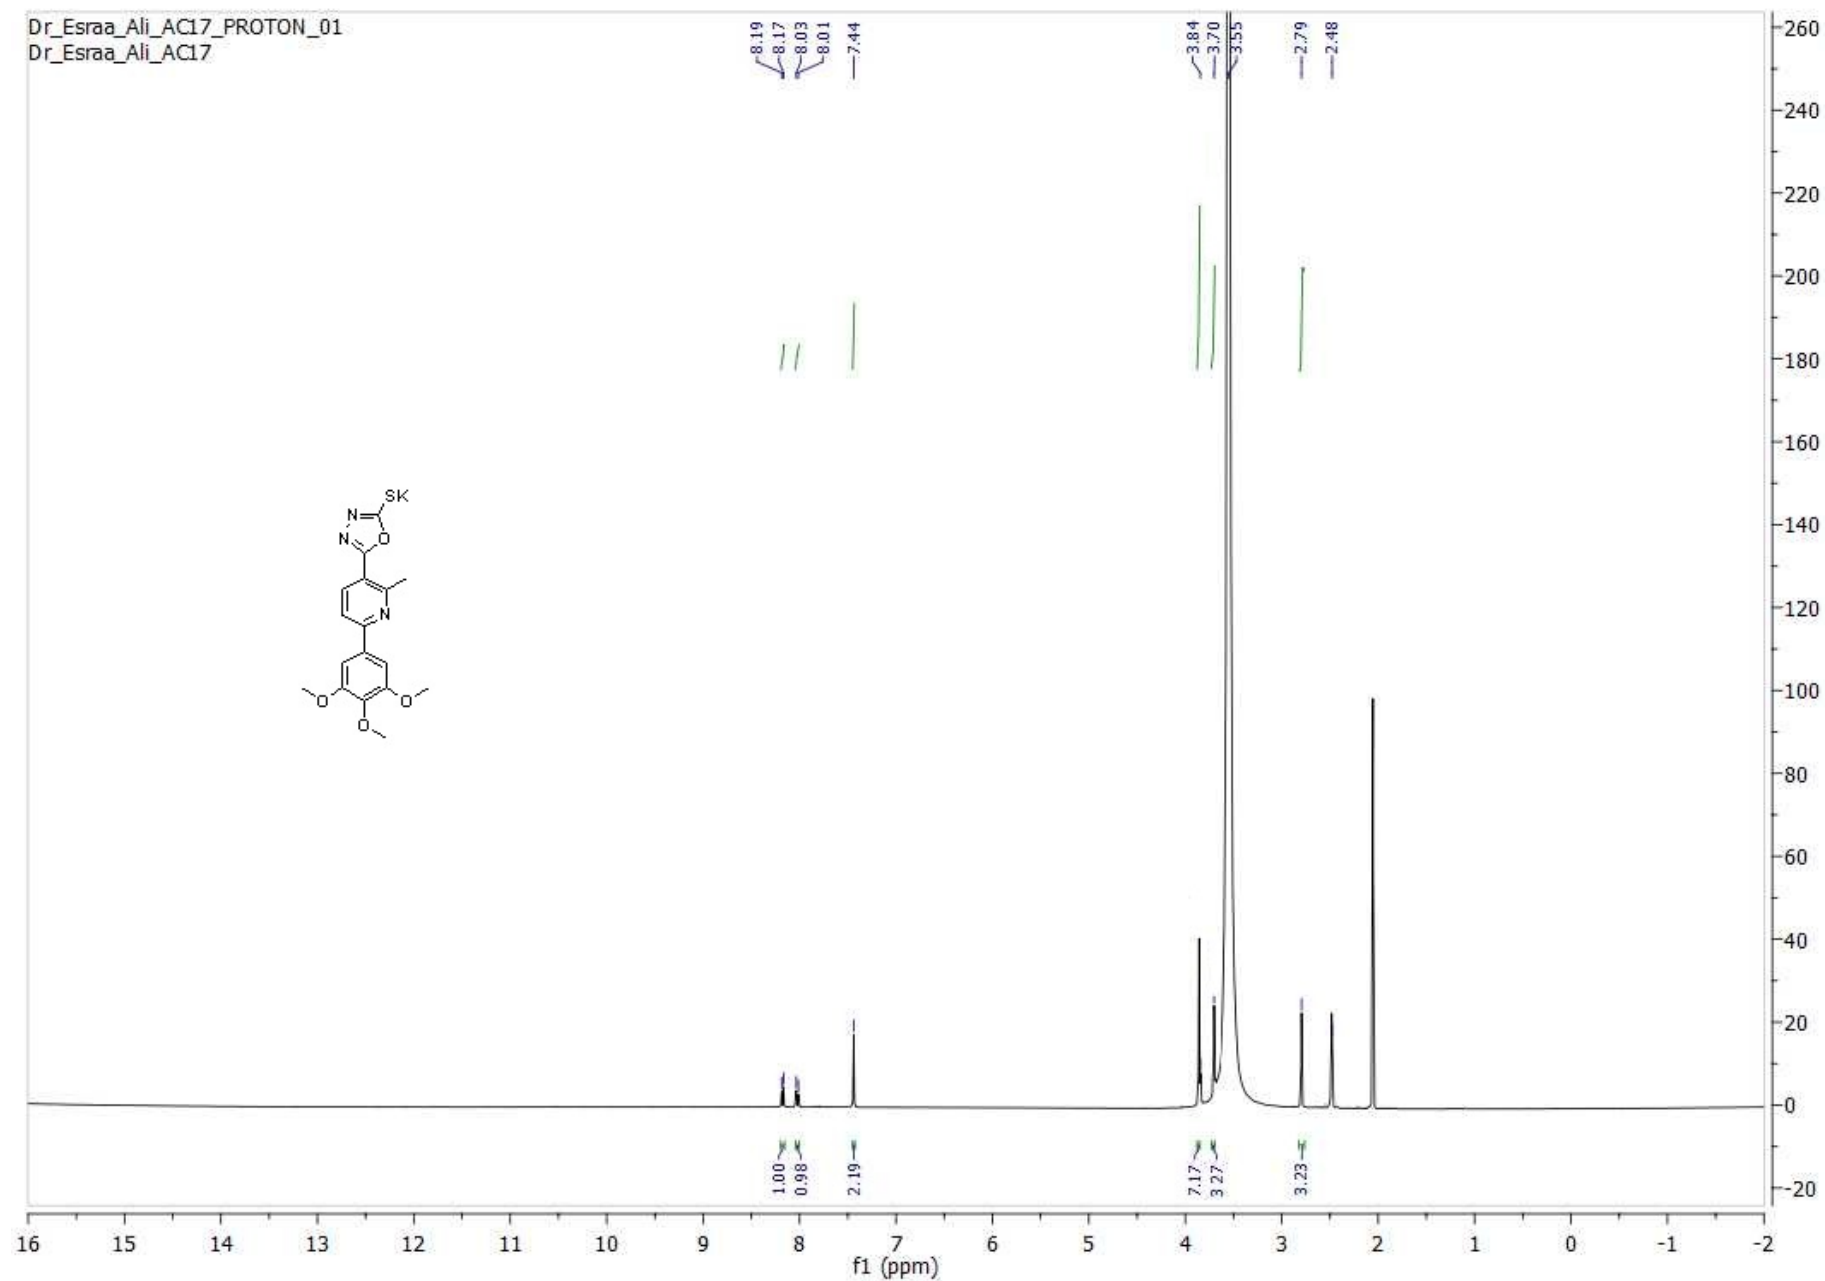

Dr\_Esraa\_Ali\_AC17\_CARBON\_01  
Dr\_Esraa\_Ali\_AC17

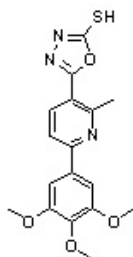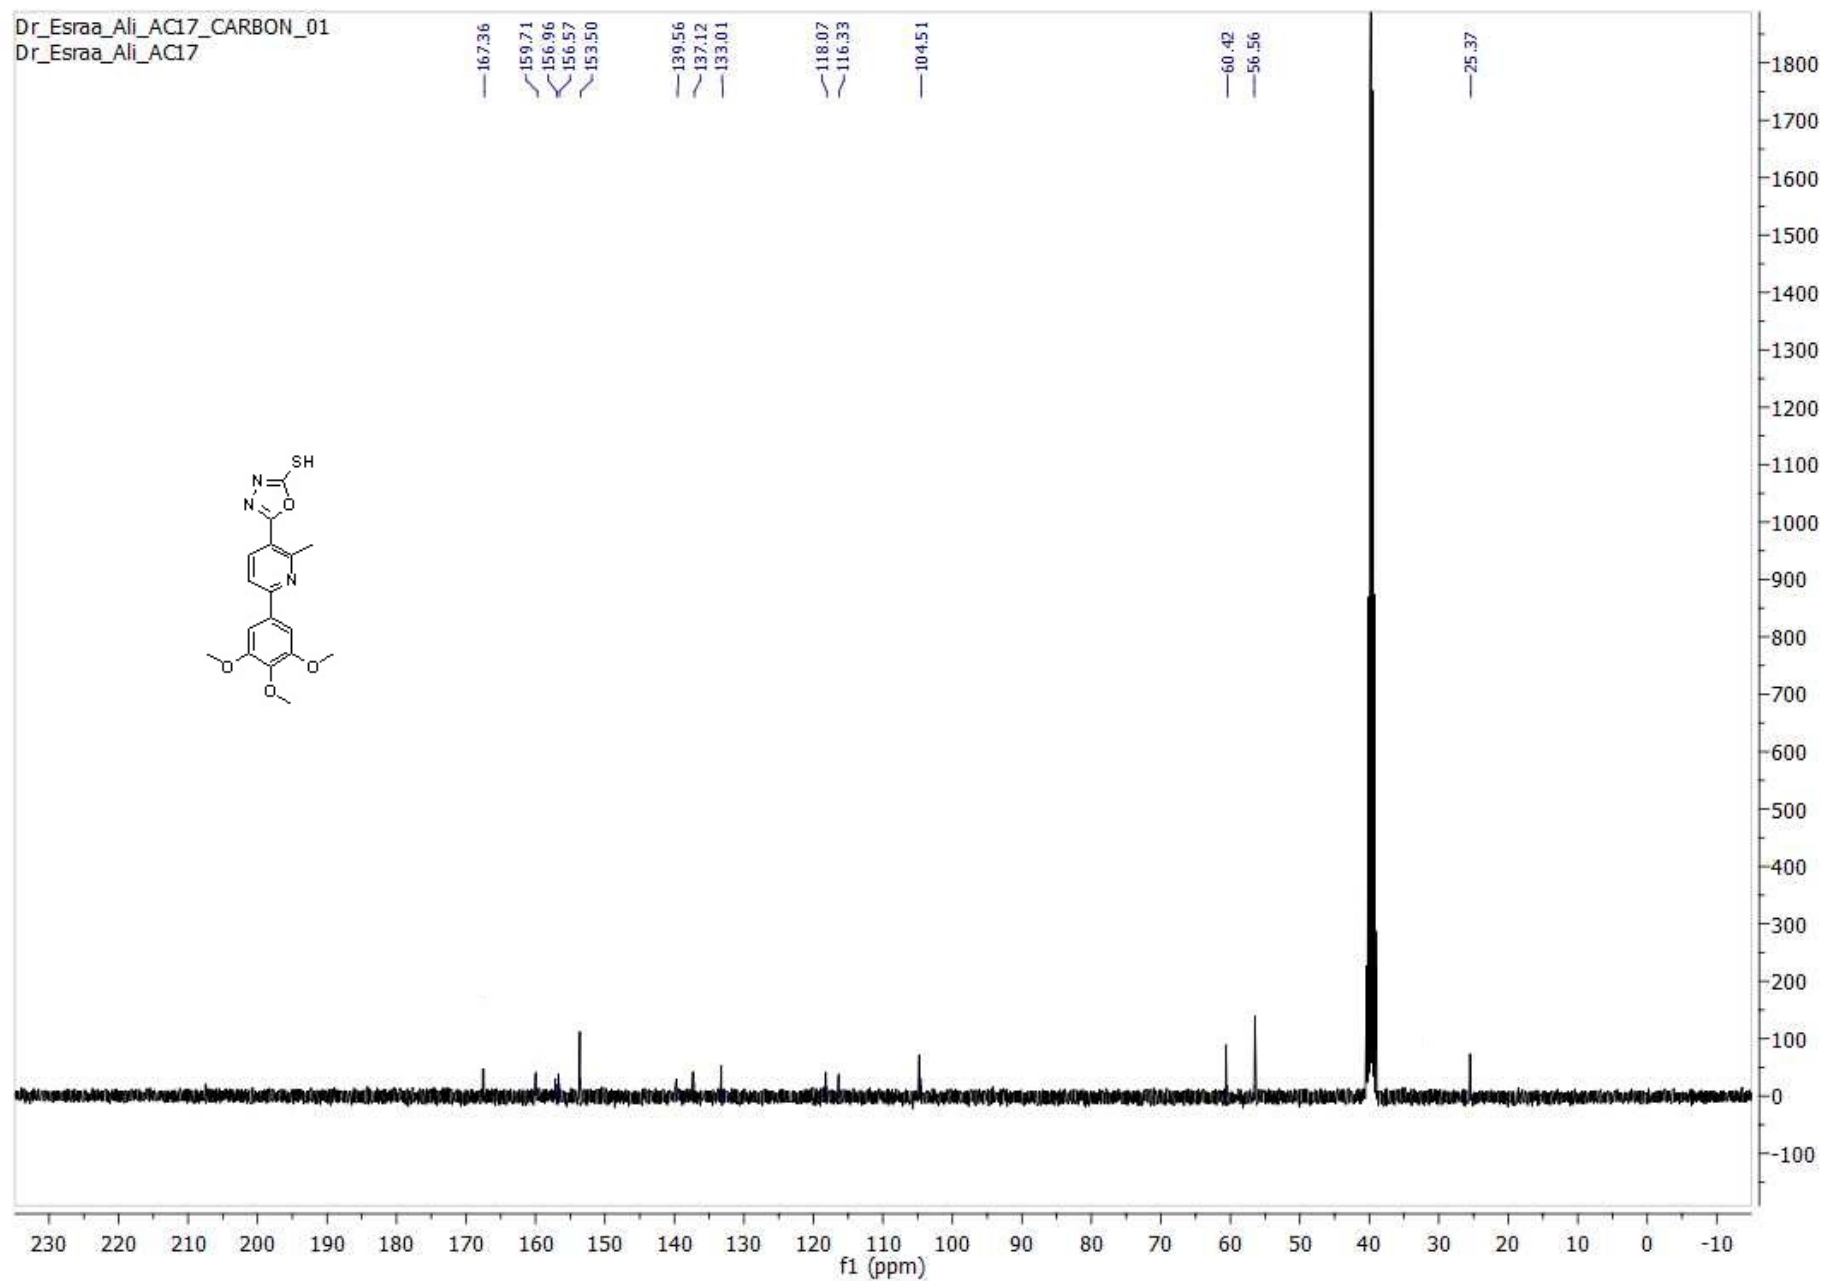

Dr\_Esraa\_Ali\_Ac20

Sample Name **Dr\_Esraa\_Ali\_Ac20**  
Date collected **2021-01-31**

Pulse sequence **PROTON**  
Solvent **DMF-D**

Temperature **26**  
Spectrometer **nmr400-mercury400**

Laboratory **MODCL**  
NMR User

Dr\_Esraa\_Ali\_Ac20

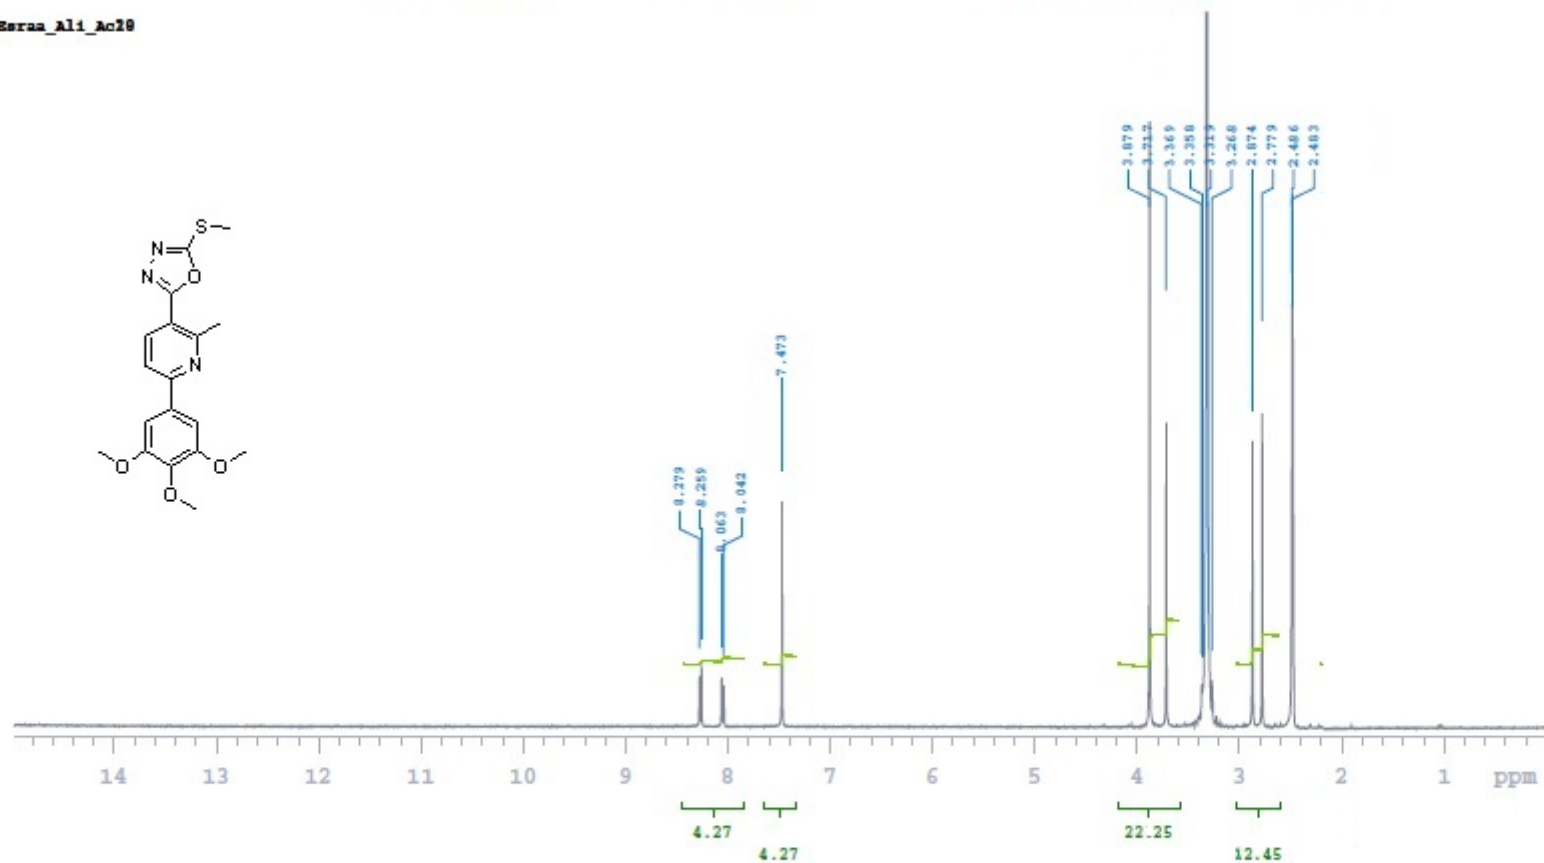

Plotname: Dr\_Esraa\_Ali\_Ac20\_PROTON\_01\_plot01

Data file: /home/data/NMRlab/2021/Jan/Dr\_Esraa\_Ali\_Ac20\_20210131\_01/Dr\_Esraa\_Ali\_Ac20\_PROTON\_01

Plot date: 2021-03-29



Dr\_Esraa\_Ali\_Ac20\_CARBO\_01  
Dr\_Esraa\_Ali\_Ac20

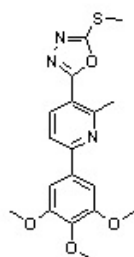

165.94  
164.59

156.96  
156.25  
153.50

139.24  
137.50  
133.33

118.77  
116.63

104.52

60.42  
56.24

25.69

14.90

3200  
3000  
2800  
2600  
2400  
2200  
2000  
1800  
1600  
1400  
1200  
1000  
800  
600  
400  
200  
0  
-200

230 220 210 200 190 180 170 160 150 140 130 120 110 100 90 80 70 60 50 40 30 20 10 0 -10  
f1 (ppm)

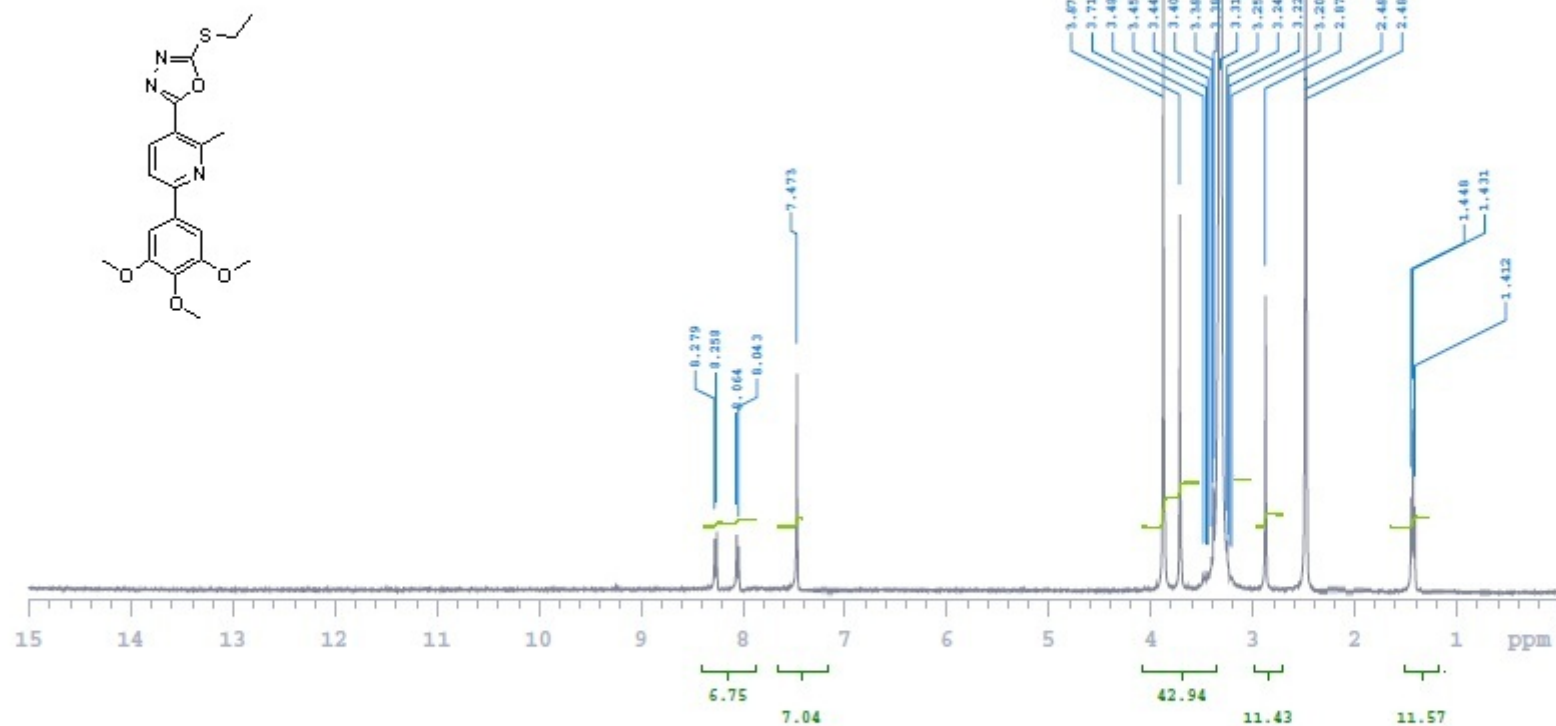

Plotname: Dr\_Esraa\_Ali\_Ac18\_PROTON\_01\_plot01

Data file /home/data/NMRlab2021/Jan/Dr\_Esraa\_Ali\_Ac18\_20210130\_01/Dr\_Esraa\_Ali\_Ac18\_PROTON\_01

Plot date 2021-03-29

18

Dr\_Esraa\_Ali\_Ac18

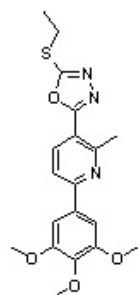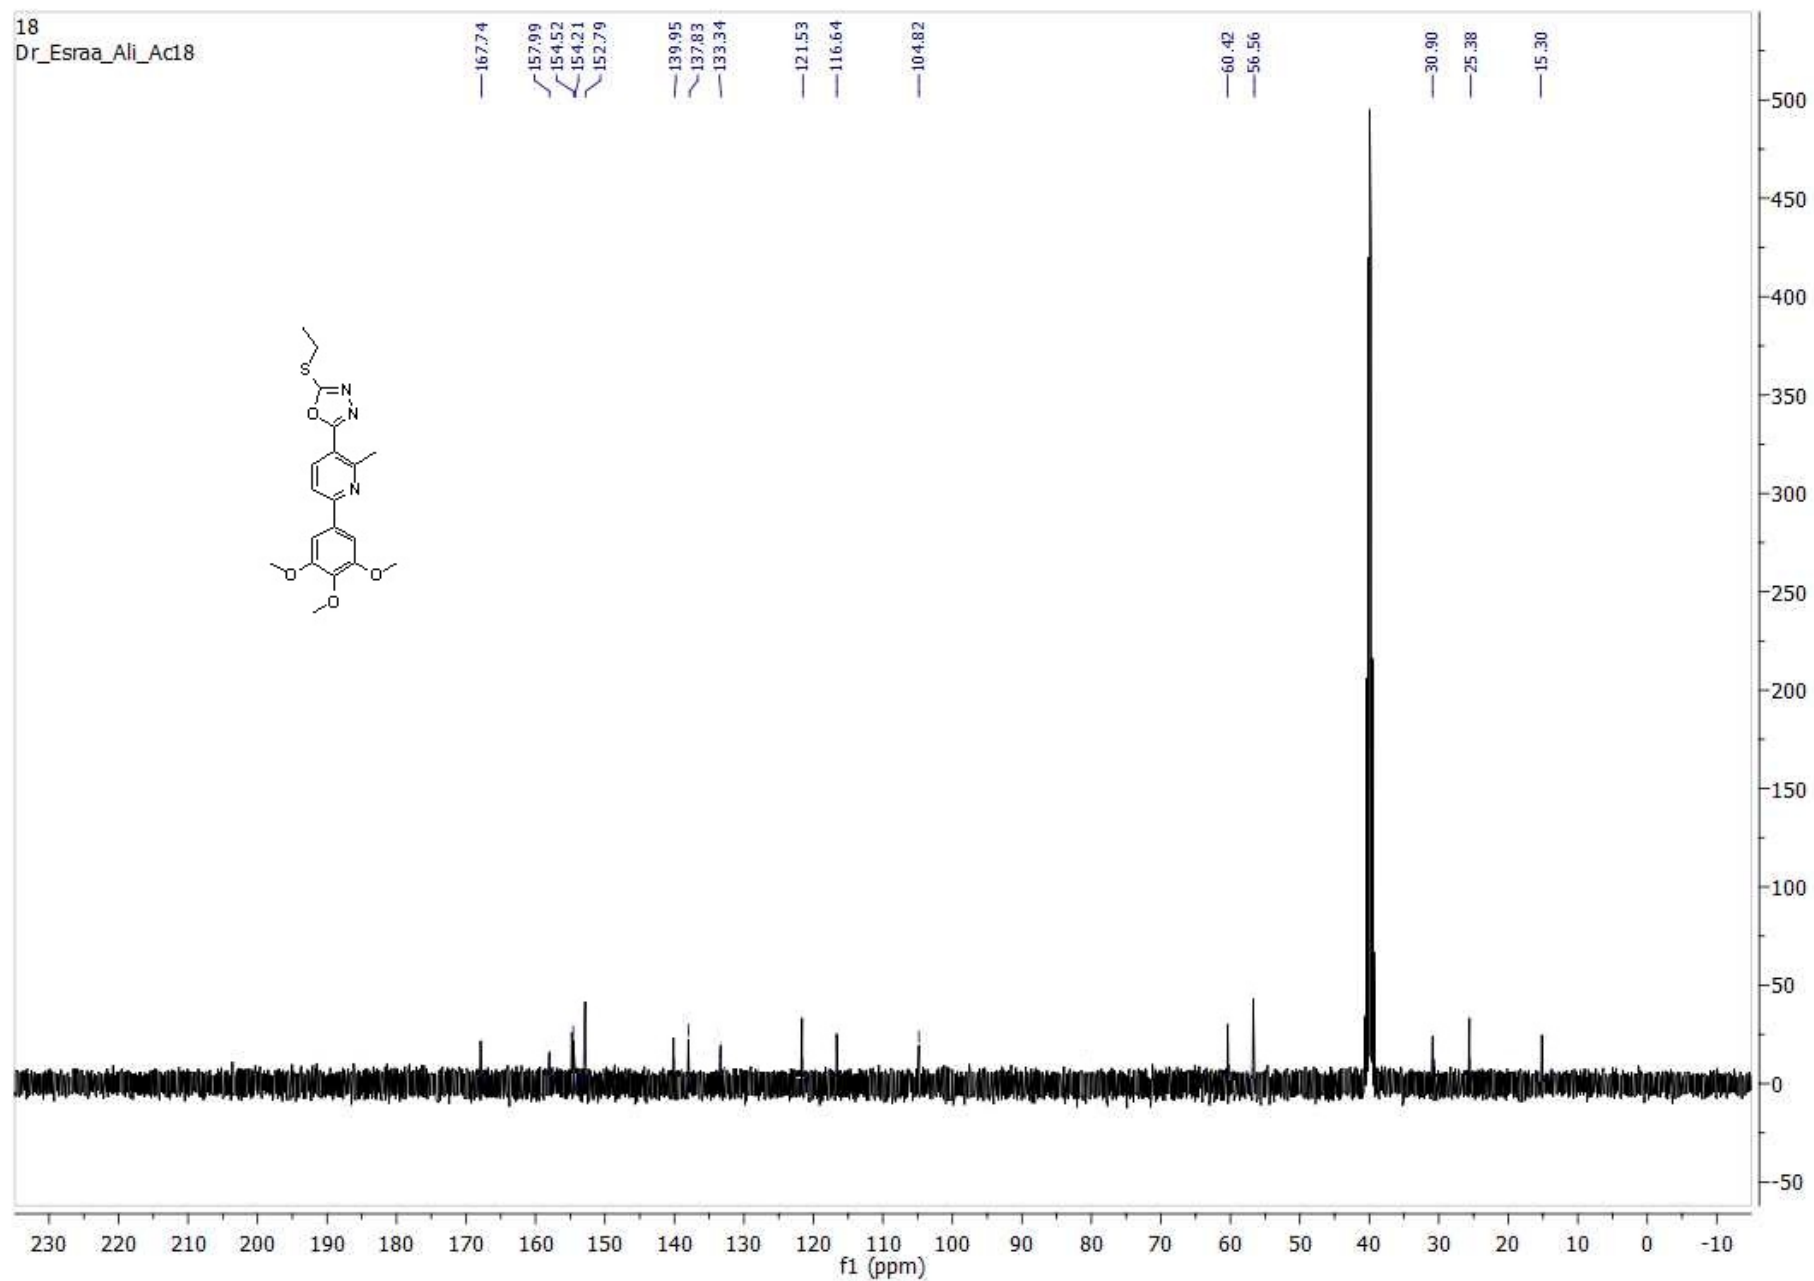

Dr\_Esraa\_Ali\_Ac21\_PROTON\_01  
Dr\_Esraa\_Ali\_Ac21

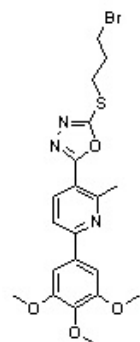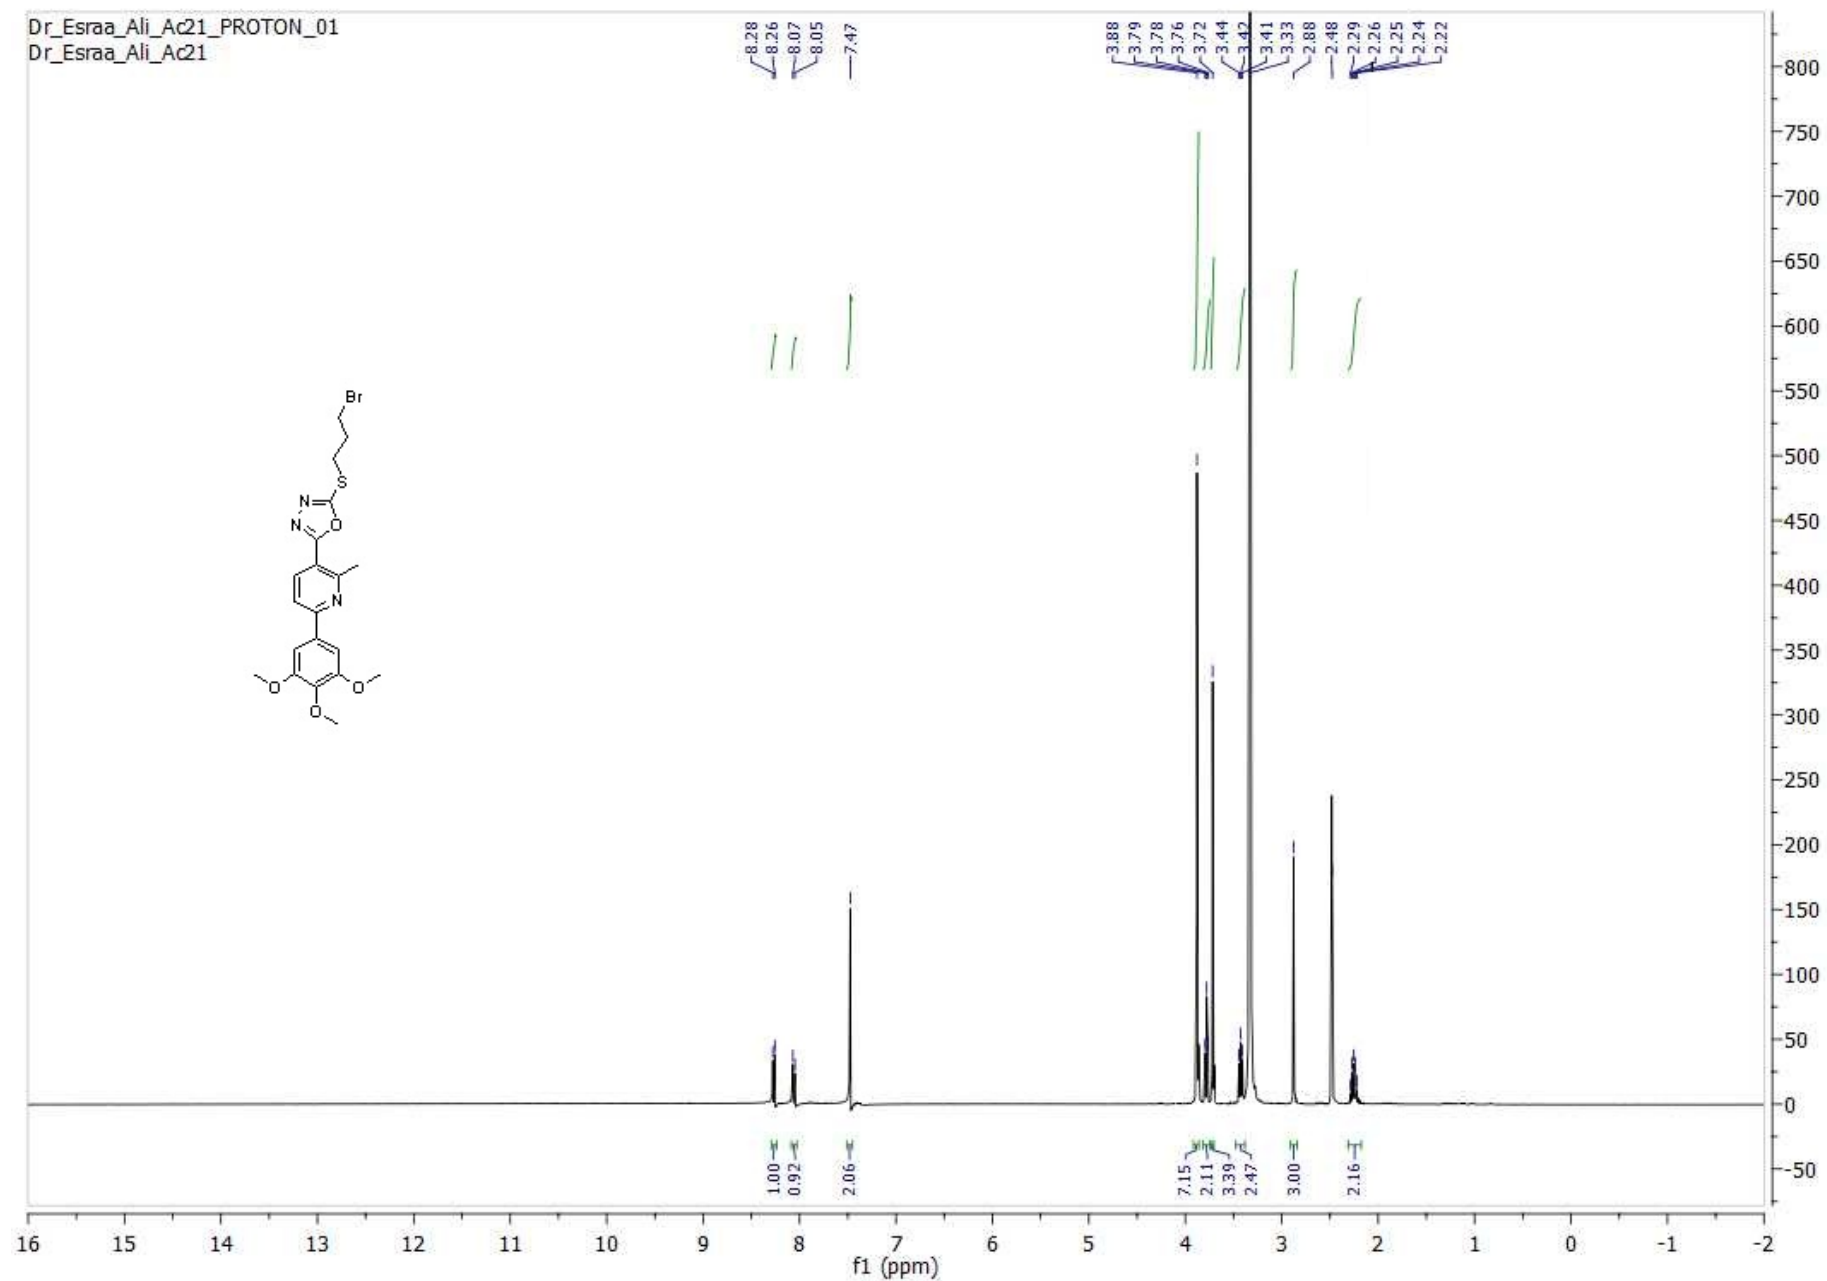

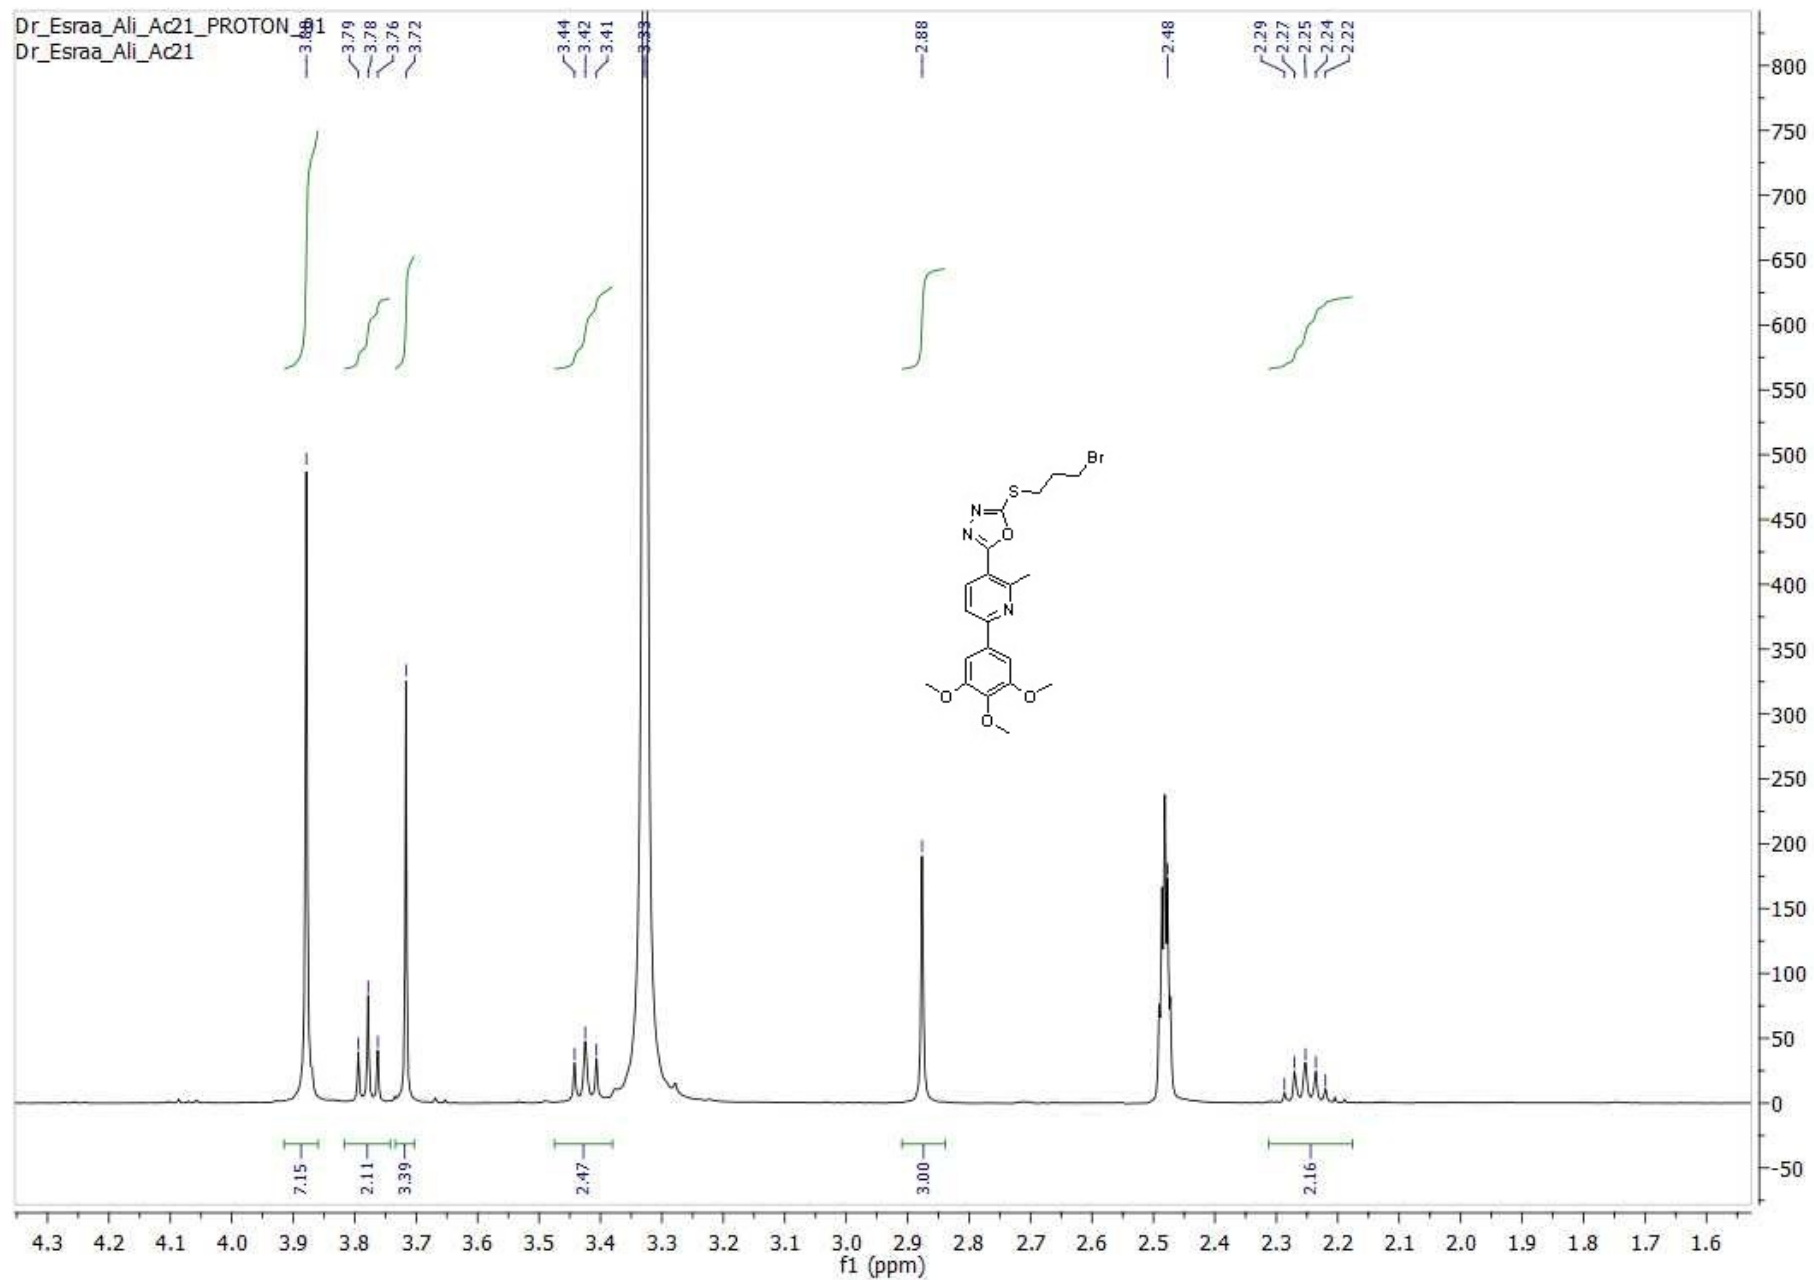

Dr\_Esraa\_Ali\_Ac21\_CARBON\_01  
Dr\_Esraa\_Ali\_Ac21

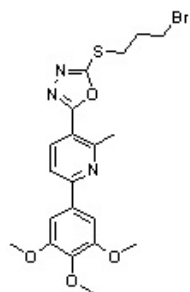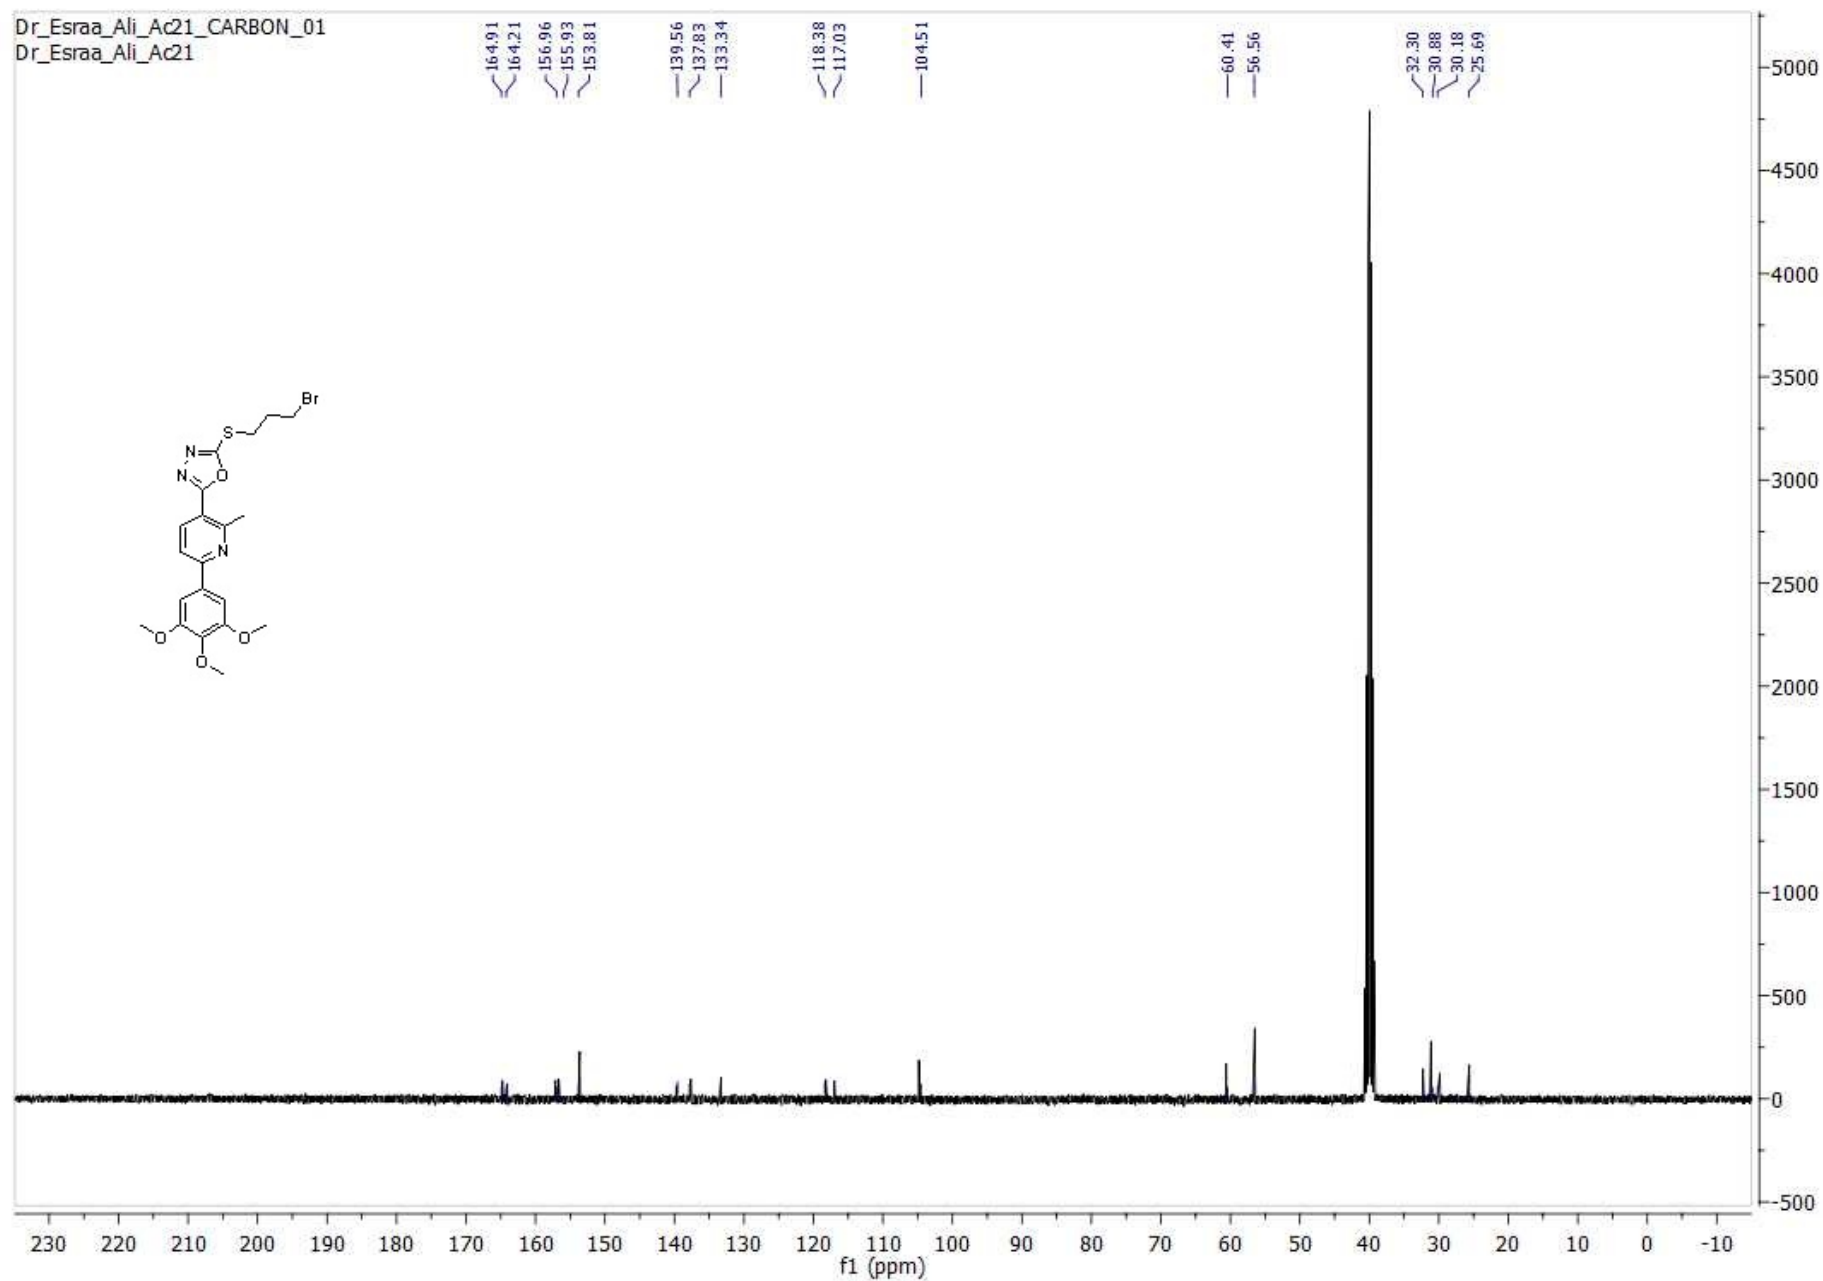

Dr\_Esraa\_Ali\_AC29\_PROTON\_01  
Dr\_Esraa\_Ali\_AC29

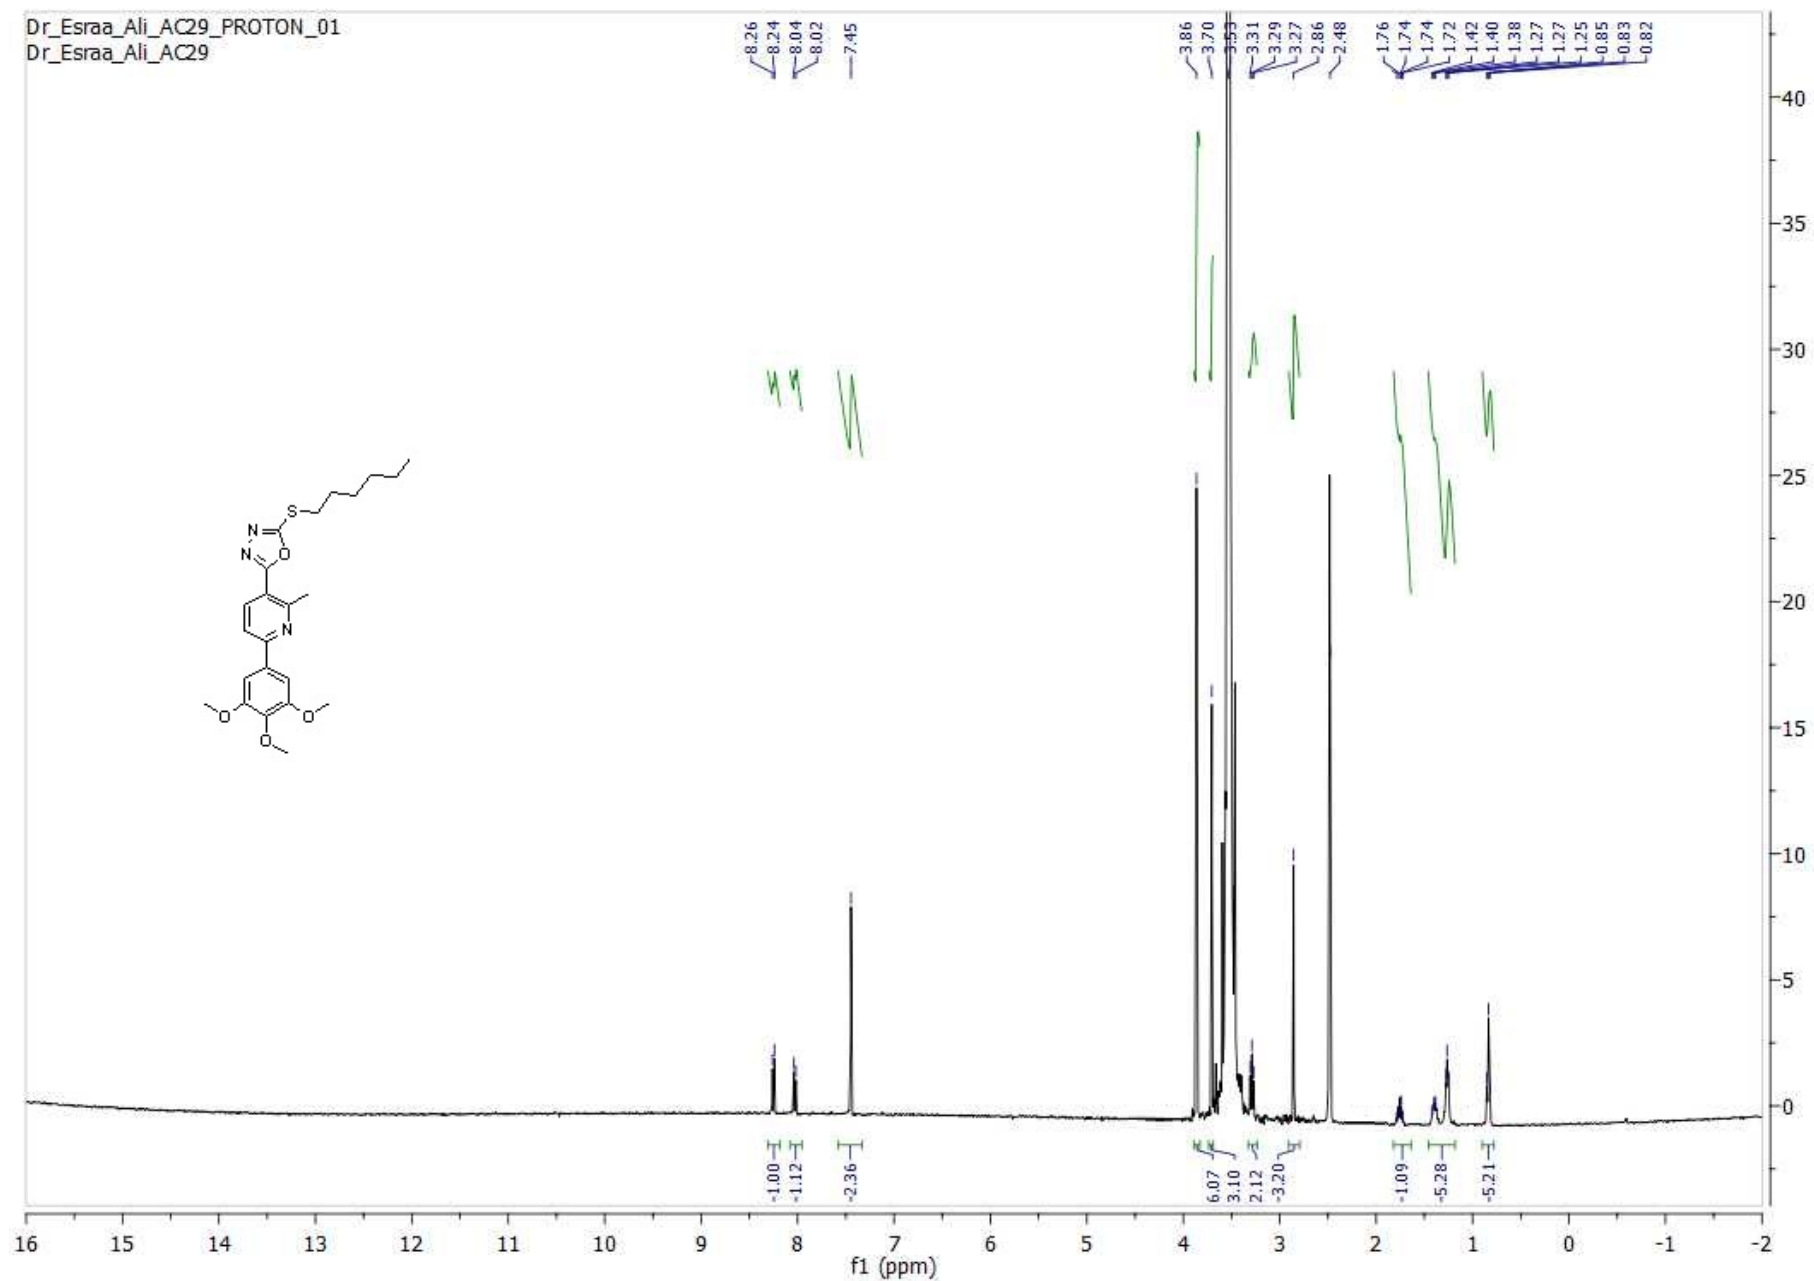

Dr\_Esraa\_Ali\_AC29\_CARBON\_01  
Dr\_Esraa\_Ali\_AC29

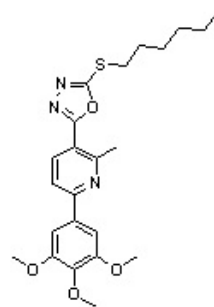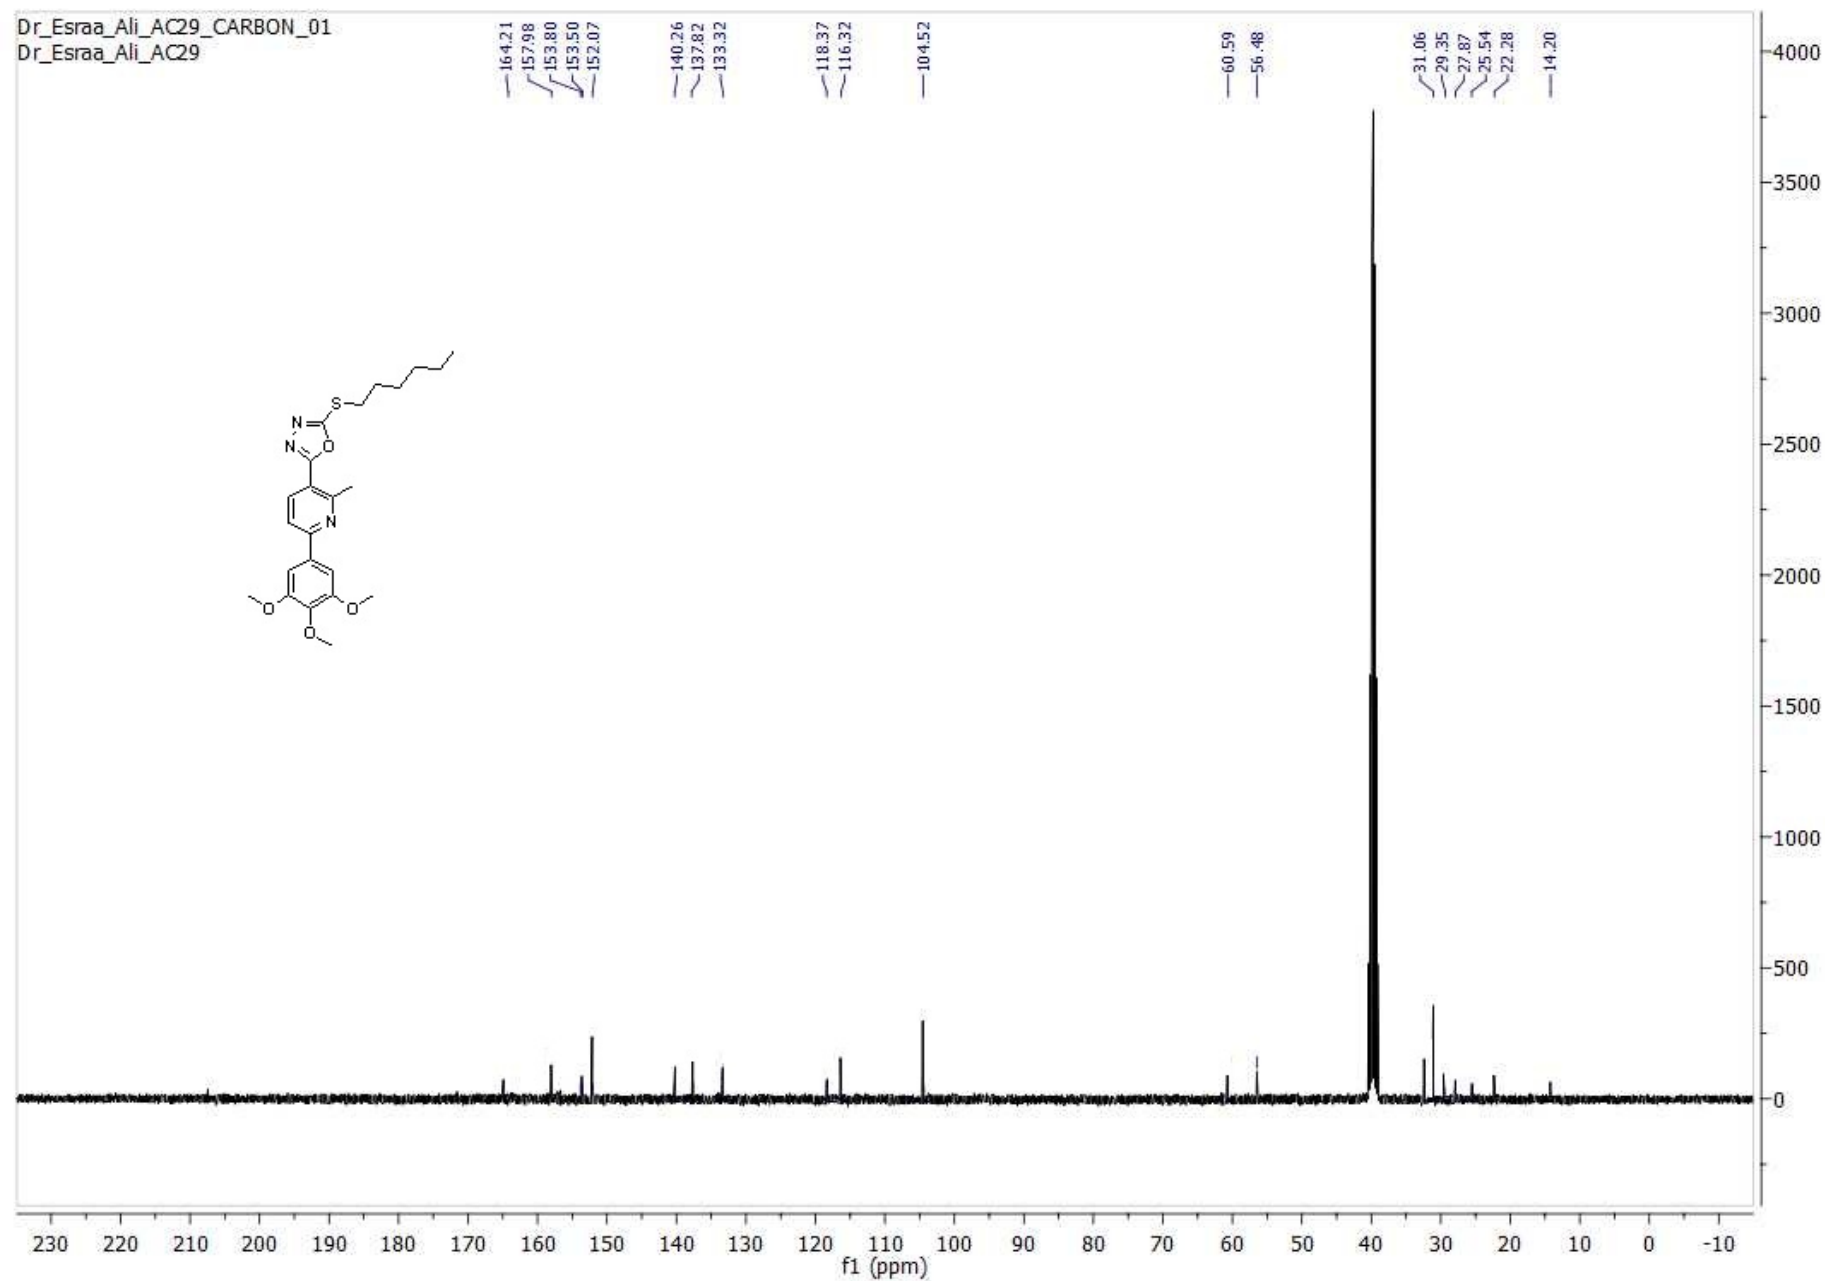



Dr\_Esraa\_Ali\_AC22\_PROTON\_01  
Dr\_Esraa\_Ali\_AC22

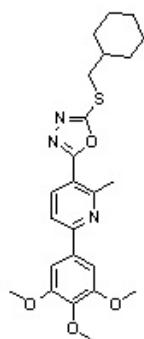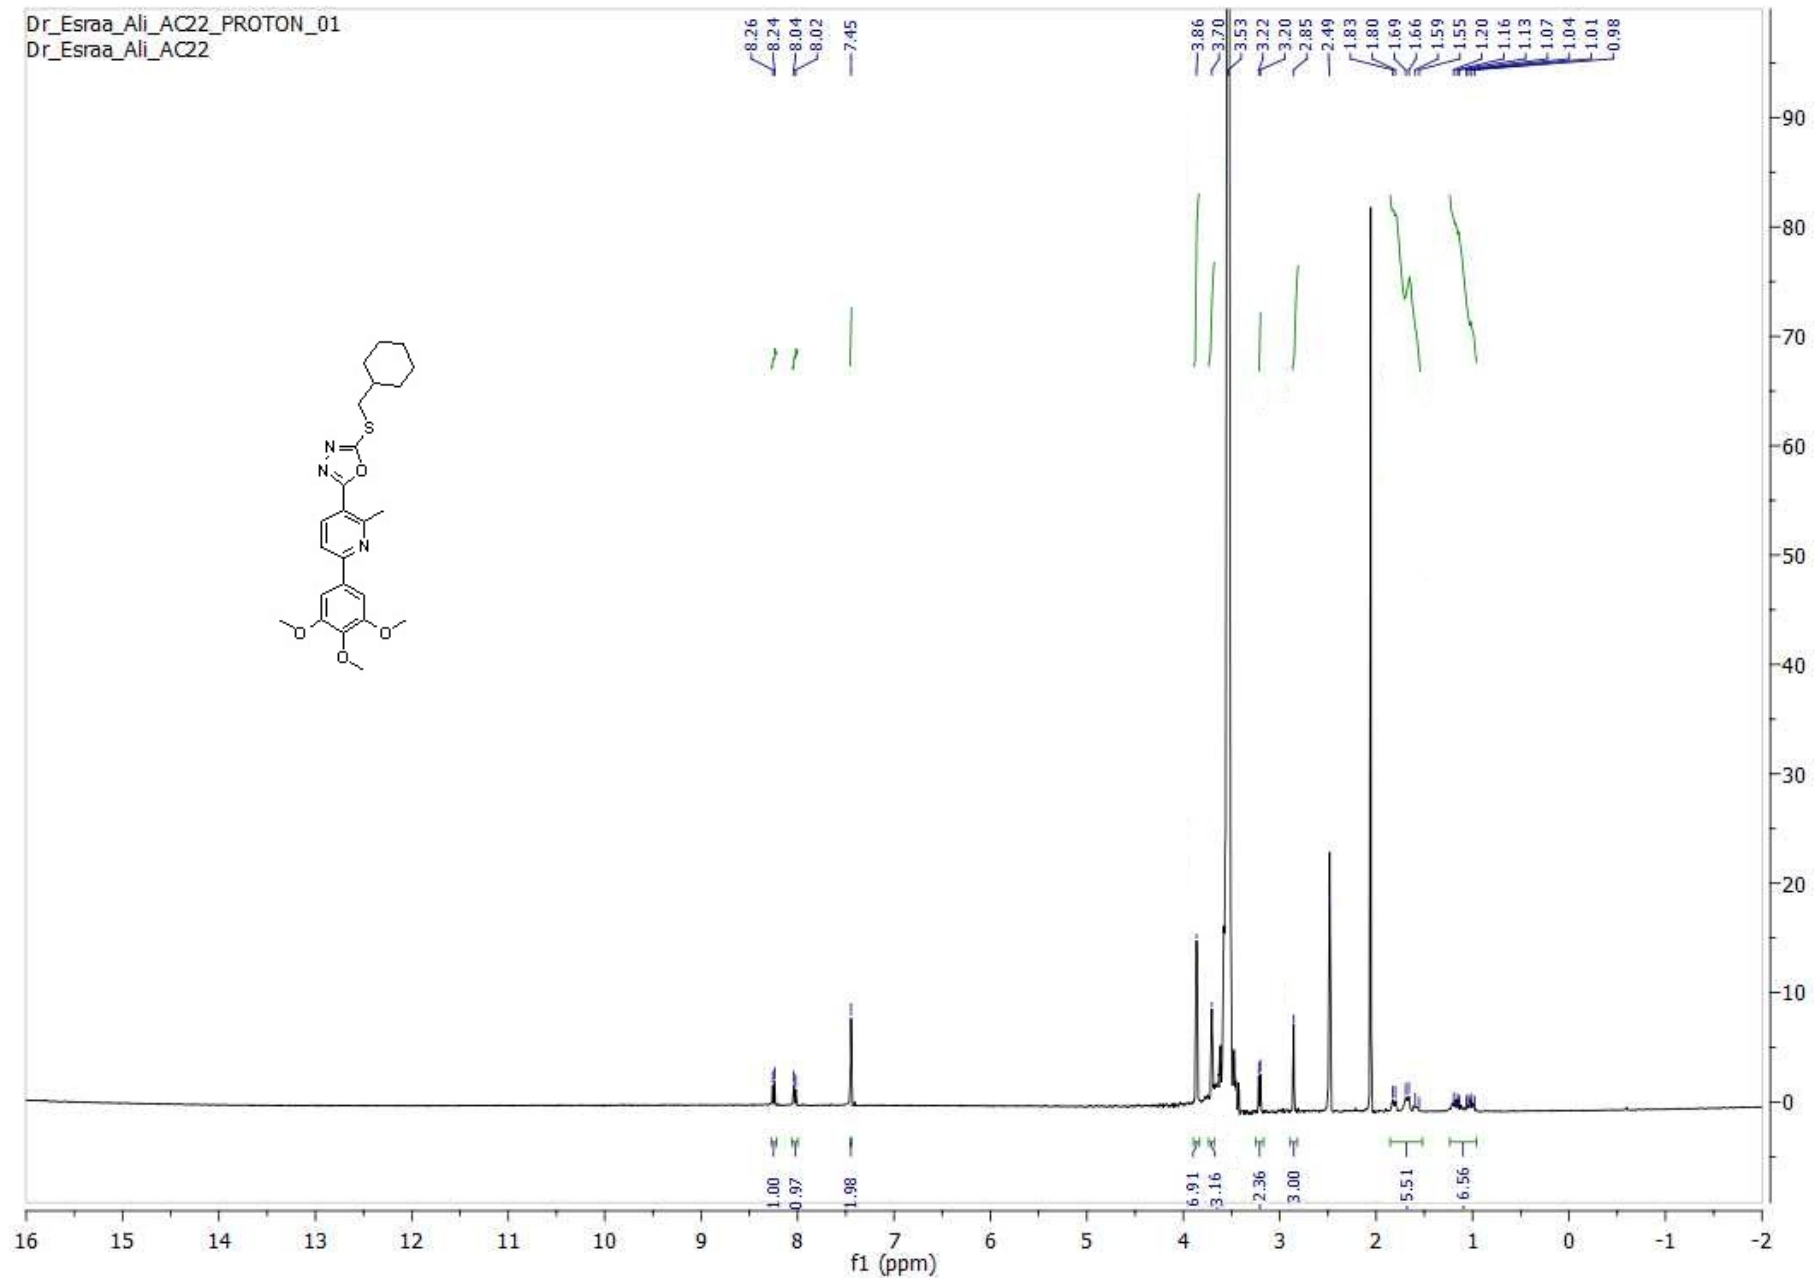

Dr\_Esraa\_Ali\_AC22\_CARBON\_01  
Dr\_Esraa\_Ali\_AC22

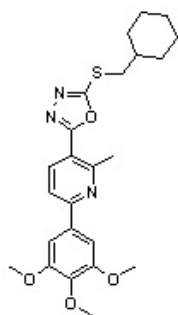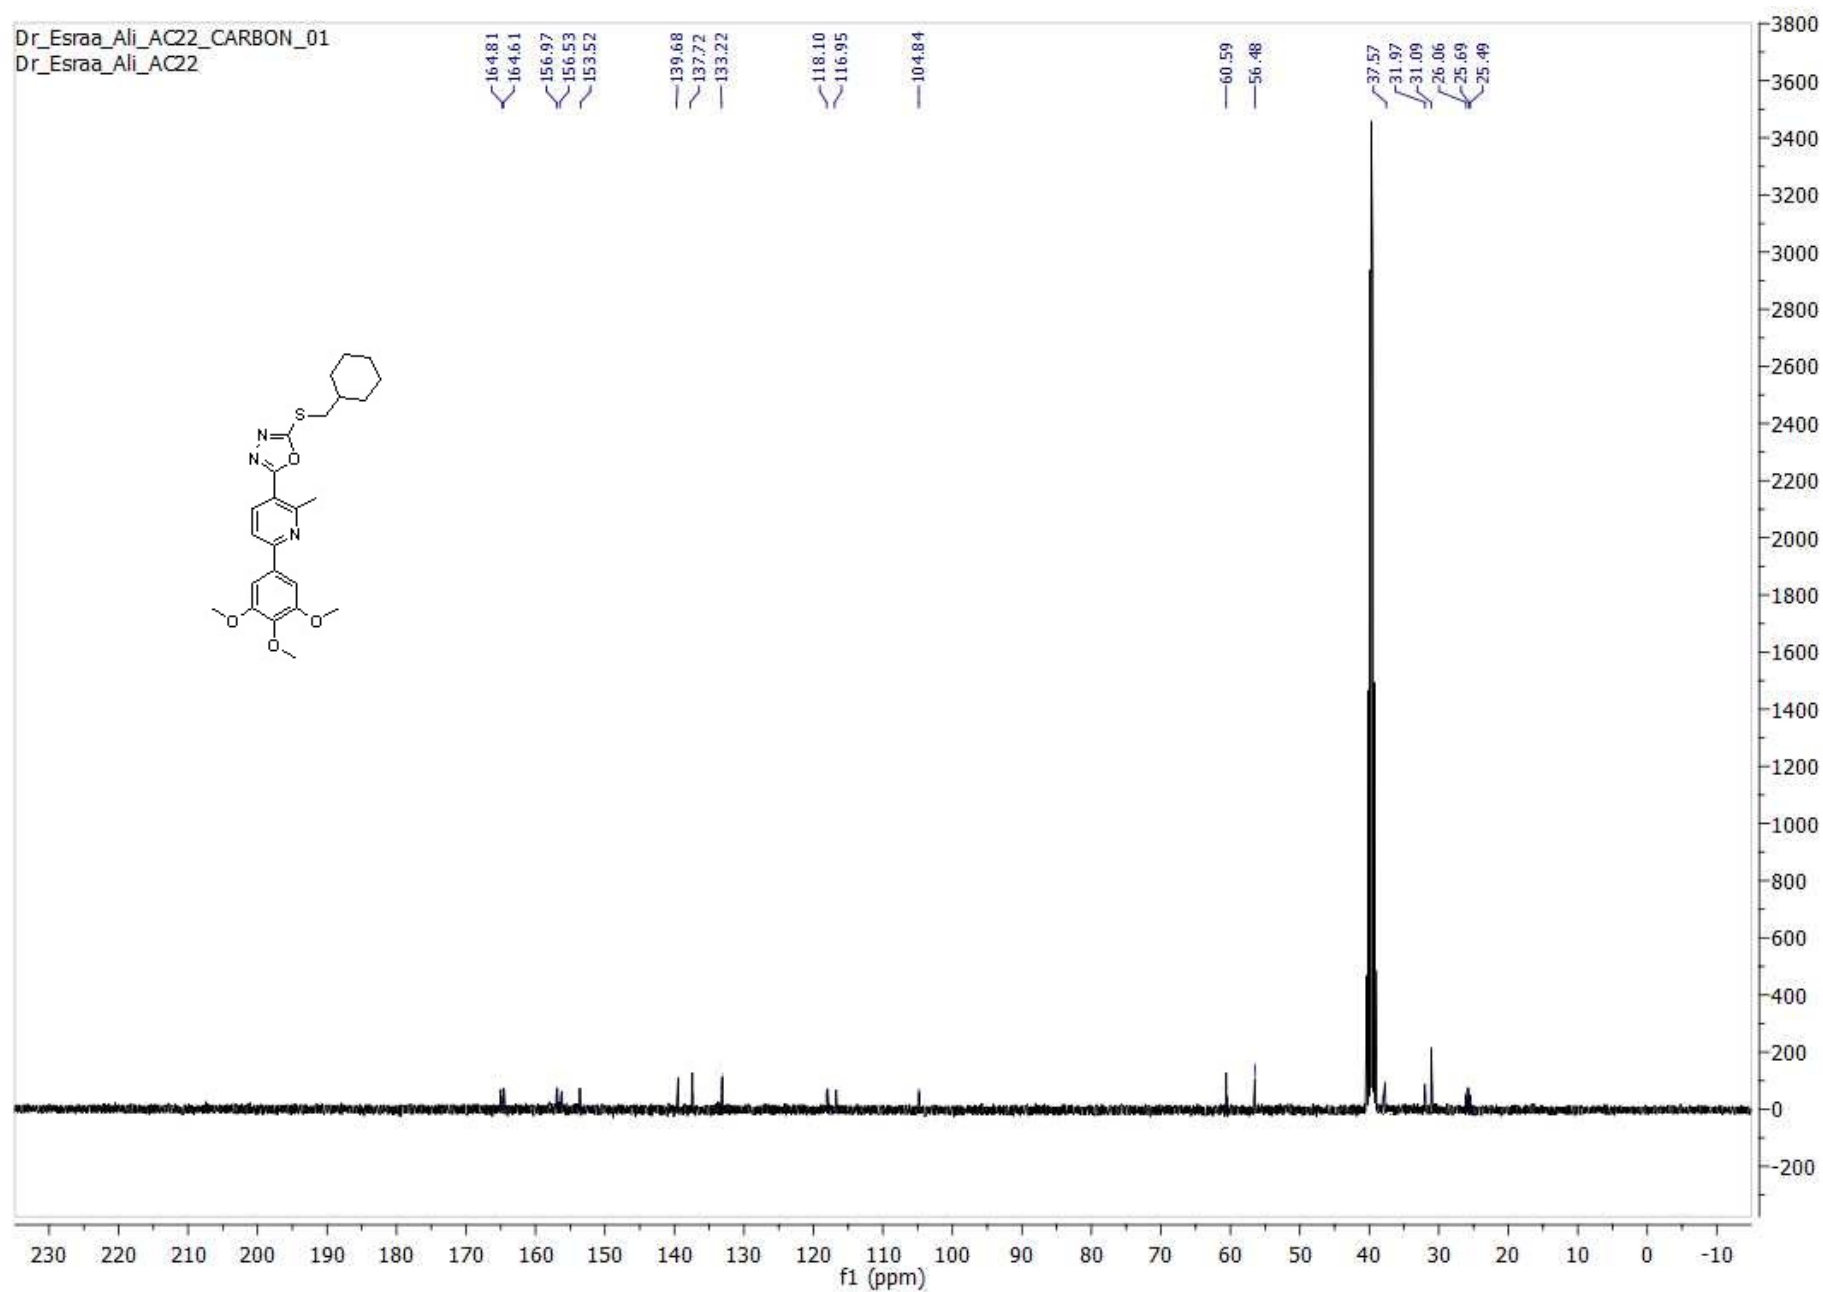

Supplement: d1ra07922k1.pdf [file d1ra07922k1.pdf]
